# Supplementary material for: Three-component solvent-free synthesis of highly substituted tetra-hydroimidazo[1,2-a]pyridines
Source: Royal Society of Chemistry journal article supplement (doi:10.1039/c1ra00242b), 2011-01-01
Supplement: c1ra00242b.pdf [file c1ra00242b.pdf]

# Three-component solvent-free synthesis of highly substituted tetrahydroimidazo[1,2-*a*]pyridines

Fuchao Yu,<sup>1</sup> Shengjiao Yan,<sup>1</sup> Rong Huang, Yajuan Tang, Jun Lin\*

*Key Laboratory of Medicinal Chemistry for Natural Resource (Yunnan University),  
Ministry of Education, School of Chemical Science and Technology, Yunnan  
University, Kunming, 650091, P. R. China*

## Supporting Information

### Table of Contents

|                                                                                                                                                    |    |
|----------------------------------------------------------------------------------------------------------------------------------------------------|----|
| General Information.....                                                                                                                           | 3  |
| General Procedure for the Preparation of Tetrahydroimidazo[1,2- <i>a</i> ]pyridine Derivatives <b>4</b> via One-pot Three-component Reactions..... | 3  |
| Spectroscopic Data of Tetrahydroimidazo[1,2- <i>a</i> ]pyridine Derivatives <b>4</b> .....                                                         | 4  |
| X-ray Structure and Data of <b>4f</b> .....                                                                                                        | 15 |
| <sup>1</sup> H NMR and <sup>13</sup> C NMR Spectra for Tetrahydroimidazo[1,2- <i>a</i> ]pyridine Derivatives <b>4</b> .....                        | 22 |
| <b>Figure 1.</b> <sup>1</sup> H NMR (500 MHz, DMSO- <i>d</i> <sub>6</sub> ) spectra of compound <b>4a</b> .....                                    | 23 |
| <b>Figure 2.</b> <sup>13</sup> C NMR (125 MHz, DMSO- <i>d</i> <sub>6</sub> ) spectra of compound <b>4a</b> .....                                   | 24 |
| <b>Figure 3.</b> <sup>1</sup> H NMR (500 MHz, DMSO- <i>d</i> <sub>6</sub> ) spectra of compound <b>4b</b> .....                                    | 25 |
| <b>Figure 4.</b> <sup>13</sup> C NMR (125 MHz, DMSO- <i>d</i> <sub>6</sub> ) spectra of compound <b>4b</b> .....                                   | 26 |
| <b>Figure 5.</b> <sup>1</sup> H NMR (500 MHz, DMSO- <i>d</i> <sub>6</sub> ) spectra of compound <b>4c</b> .....                                    | 27 |
| <b>Figure 6.</b> <sup>13</sup> C NMR (125 MHz, DMSO- <i>d</i> <sub>6</sub> ) spectra of compound <b>4c</b> .....                                   | 28 |
| <b>Figure 7.</b> <sup>1</sup> H NMR (500 MHz, DMSO- <i>d</i> <sub>6</sub> ) spectra of compound <b>4d</b> .....                                    | 29 |
| <b>Figure 8.</b> <sup>13</sup> C NMR (125 MHz, DMSO- <i>d</i> <sub>6</sub> ) spectra of compound <b>4d</b> .....                                   | 30 |
| <b>Figure 9.</b> <sup>1</sup> H NMR (500 MHz, CDCl <sub>3</sub> +DMSO- <i>d</i> <sub>6</sub> ) spectra of compound <b>4e</b> .....                 | 31 |
| <b>Figure 10.</b> <sup>13</sup> C NMR (125 MHz, CDCl <sub>3</sub> +DMSO- <i>d</i> <sub>6</sub> ) spectra of compound <b>4e</b> .....               | 32 |
| <b>Figure 11.</b> <sup>1</sup> H NMR (500 MHz, DMSO- <i>d</i> <sub>6</sub> ) spectra of compound <b>4f</b> .....                                   | 33 |
| <b>Figure 12.</b> <sup>13</sup> C NMR (125 MHz, DMSO- <i>d</i> <sub>6</sub> ) spectra of compound <b>4f</b> .....                                  | 34 |
| <b>Figure 13.</b> <sup>1</sup> H NMR (500 MHz, DMSO- <i>d</i> <sub>6</sub> ) spectra of compound <b>4g</b> .....                                   | 35 |
| <b>Figure 14.</b> <sup>13</sup> C NMR (125 MHz, DMSO- <i>d</i> <sub>6</sub> ) spectra of compound <b>4g</b> .....                                  | 36 |
| <b>Figure 15.</b> <sup>1</sup> H NMR (500 MHz, DMSO- <i>d</i> <sub>6</sub> ) spectra of compound <b>4h</b> .....                                   | 37 |
| <b>Figure 16.</b> <sup>13</sup> C NMR (125 MHz, DMSO- <i>d</i> <sub>6</sub> ) spectra of compound <b>4h</b> .....                                  | 38 |
| <b>Figure 17.</b> <sup>1</sup> H NMR (500 MHz, DMSO- <i>d</i> <sub>6</sub> ) spectra of compound <b>4i</b> .....                                   | 39 |
| <b>Figure 18.</b> <sup>13</sup> C NMR (125 MHz, DMSO- <i>d</i> <sub>6</sub> ) spectra of compound <b>4i</b> .....                                  | 40 |
| <b>Figure 19.</b> <sup>1</sup> H NMR (500 MHz, DMSO- <i>d</i> <sub>6</sub> ) spectra of compound <b>4j</b> .....                                   | 41 |
| <b>Figure 20.</b> <sup>13</sup> C NMR (125 MHz, DMSO- <i>d</i> <sub>6</sub> ) spectra of compound <b>4j</b> .....                                  | 42 |
| <b>Figure 21.</b> <sup>1</sup> H NMR (500 MHz, DMSO- <i>d</i> <sub>6</sub> ) spectra of compound <b>4k</b> .....                                   | 43 |

|                                                                                                         |    |
|---------------------------------------------------------------------------------------------------------|----|
| <b>Figure 22.</b> $^{13}\text{C}$ NMR (125 MHz, $\text{DMSO-}d_6$ ) spectra of compound <b>4k</b> ..... | 44 |
| <b>Figure 23.</b> $^1\text{H}$ NMR (500 MHz, $\text{CDCl}_3$ ) spectra of compound <b>4l</b> .....      | 45 |
| <b>Figure 24.</b> $^{13}\text{C}$ NMR (125 MHz, $\text{CDCl}_3$ ) spectra of compound <b>4l</b> .....   | 46 |
| <b>Figure 25.</b> $^1\text{H}$ NMR (500 MHz, $\text{DMSO-}d_6$ ) spectra of compound <b>4m</b> .....    | 47 |
| <b>Figure 26.</b> $^{13}\text{C}$ NMR (125 MHz, $\text{DMSO-}d_6$ ) spectra of compound <b>4m</b> ..... | 48 |
| <b>Figure 27.</b> $^1\text{H}$ NMR (500 MHz, $\text{DMSO-}d_6$ ) spectra of compound <b>4n</b> .....    | 49 |
| <b>Figure 28.</b> $^{13}\text{C}$ NMR (125 MHz, $\text{DMSO-}d_6$ ) spectra of compound <b>4n</b> ..... | 50 |
| <b>Figure 29.</b> $^1\text{H}$ NMR (500 MHz, $\text{DMSO-}d_6$ ) spectra of compound <b>4o</b> .....    | 51 |
| <b>Figure 30.</b> $^{13}\text{C}$ NMR (125 MHz, $\text{DMSO-}d_6$ ) spectra of compound <b>4o</b> ..... | 52 |
| <b>Figure 31.</b> $^1\text{H}$ NMR (500 MHz, $\text{DMSO-}d_6$ ) spectra of compound <b>4p</b> .....    | 53 |
| <b>Figure 32.</b> $^{13}\text{C}$ NMR (125 MHz, $\text{DMSO-}d_6$ ) spectra of compound <b>4p</b> ..... | 54 |
| <b>Figure 33.</b> $^1\text{H}$ NMR (500 MHz, $\text{DMSO-}d_6$ ) spectra of compound <b>4q</b> .....    | 55 |
| <b>Figure 34.</b> $^{13}\text{C}$ NMR (125 MHz, $\text{DMSO-}d_6$ ) spectra of compound <b>4q</b> ..... | 56 |
| <b>Figure 35.</b> $^1\text{H}$ NMR (500 MHz, $\text{DMSO-}d_6$ ) spectra of compound <b>4r</b> .....    | 57 |
| <b>Figure 36.</b> $^{13}\text{C}$ NMR (125 MHz, $\text{DMSO-}d_6$ ) spectra of compound <b>4r</b> ..... | 58 |
| <b>Figure 37.</b> $^1\text{H}$ NMR (500 MHz, $\text{DMSO-}d_6$ ) spectra of compound <b>4s</b> .....    | 59 |
| <b>Figure 38.</b> $^{13}\text{C}$ NMR (125 MHz, $\text{DMSO-}d_6$ ) spectra of compound <b>4s</b> ..... | 60 |
| <b>Figure 39.</b> $^1\text{H}$ NMR (500 MHz, $\text{DMSO-}d_6$ ) spectra of compound <b>4t</b> .....    | 61 |
| <b>Figure 40.</b> $^{13}\text{C}$ NMR (125 MHz, $\text{DMSO-}d_6$ ) spectra of compound <b>4t</b> ..... | 62 |
| <b>Figure 41.</b> $^1\text{H}$ NMR (500 MHz, $\text{DMSO-}d_6$ ) spectra of compound <b>4u</b> .....    | 63 |
| <b>Figure 42.</b> $^{13}\text{C}$ NMR (125 MHz, $\text{DMSO-}d_6$ ) spectra of compound <b>4u</b> ..... | 64 |
| <b>Figure 43.</b> $^1\text{H}$ NMR (500 MHz, $\text{DMSO-}d_6$ ) spectra of compound <b>4v</b> .....    | 65 |
| <b>Figure 44.</b> $^{13}\text{C}$ NMR (125 MHz, $\text{DMSO-}d_6$ ) spectra of compound <b>4v</b> ..... | 66 |
| <b>Figure 45.</b> $^1\text{H}$ NMR (500 MHz, $\text{DMSO-}d_6$ ) spectra of compound <b>4w</b> .....    | 67 |
| <b>Figure 46.</b> $^{13}\text{C}$ NMR (125 MHz, $\text{DMSO-}d_6$ ) spectra of compound <b>4w</b> ..... | 68 |
| <b>Figure 47.</b> $^1\text{H}$ NMR (500 MHz, $\text{DMSO-}d_6$ ) spectra of compound <b>4x</b> .....    | 69 |
| <b>Figure 48.</b> $^{13}\text{C}$ NMR (125 MHz, $\text{DMSO-}d_6$ ) spectra of compound <b>4x</b> ..... | 70 |
| <b>Figure 49.</b> $^1\text{H}$ NMR (500 MHz, $\text{DMSO-}d_6$ ) spectra of compound <b>4y</b> .....    | 71 |
| <b>Figure 50.</b> $^{13}\text{C}$ NMR (125 MHz, $\text{DMSO-}d_6$ ) spectra of compound <b>4y</b> ..... | 72 |
| <b>References and Notes</b> .....                                                                       | 73 |

## General Information

All compounds were fully characterized by spectroscopic data. The NMR spectra were recorded on a Bruker DRX500 ( $^1\text{H}$ : 500 MHz,  $^{13}\text{C}$ : 125 MHz), chemical shifts ( $\delta$ ) are expressed in ppm, and  $J$  values are given in Hz, and deuterated  $\text{CDCl}_3$  and  $\text{DMSO}-d_6$  were used as solvent. IR spectra were recorded on a FT-IR Thermo Nicolet Avatar 360 using KBr pellet. The reactions were monitored by thin layer chromatography (TLC) using silica gel GF<sub>254</sub>. The melting points were determined on XT-4A melting point apparatus and are uncorrected. HRMs were performed on a Agilent LC/Msd TOF instrument.

All chemicals and solvents were used as received without further purification unless otherwise stated. Column chromatography was performed on silica gel (200–300 mesh).

The substrates **1a~1d** were synthesized according to the literature.<sup>1</sup> Compound **1e** was prepared according to the literature.<sup>2</sup> The substrates **3a~3h** were synthesized according to the literature.<sup>3</sup>

## General Procedure for the Preparation of Tetrahydroimidazo[1,2-*a*]pyridine Derivatives **4** via One-pot Three-component Reactions

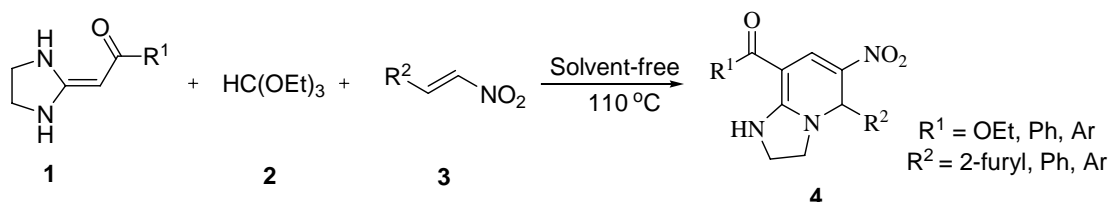

HKA derivatives **1** (2.5 mmol), triethoxy-methane **2** (3 mmol) and nitroalkene derivatives **3** (3 mmol) were charged into a 25 mL round-bottom flask and the mixture was heated to 110°C. The resulting solution was stirred for 20–38 min until the HKA derivatives **1** were completely consumed. The mixture was diluted with EtOAc (50 mL x 2) and quenched with water (50 mL). The organic layer was dried by  $\text{Na}_2\text{SO}_4$ , concentrated, and purified by flash column chromatography (Petro/AcOEt = 1/1) to afford product **4** with 73–93% yield. The products were further identified by FTIR, NMR and HRMS, being in good agreement with the assigned structures (See Supplementary Information).

### Spectroscopic Data of Tetrahydroimidazo[1,2-a]pyridine Derivatives 4

#### **(4-Chlorophenyl)(5-(furan-2-yl)-1,2,3,5-tetrahydro-6-nitroimidazo[1,2-a]pyridin-8-yl)methanone (4a)**

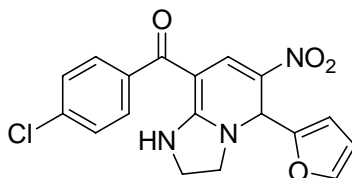

Yellow solid; Mp 257–258 °C; IR (KBr): 3288, 2900, 1594, 1408, 1292, 1228, 1163, 1075, 769  $\text{cm}^{-1}$ ;  $^1\text{H}$  NMR (500 MHz,  $\text{DMSO-}d_6$ ):  $\delta$  = 3.18–3.23 (m, 1H,  $\text{NCH}_2$ ), 3.75–3.80 (m, 3H,  $\text{NCH}_2\text{CH}_2\text{N}$ ), 6.02 (s, 1H, NCH), 6.48 (s, 1H, ArH), 6.54 (s, 1H, ArH), 7.55 (d,  $J$  = 8.1 Hz, 2H, ArH), 7.60 (d,  $J$  = 8.1 Hz, 2H, ArH), 7.67 (s, 1H, ArH), 7.99 (s, 1H, CH=), 9.37 (br, 1H, NH);  $^{13}\text{C}$  NMR (125 MHz,  $\text{DMSO-}d_6$ ):  $\delta$  = 43.7, 45.9, 51.6, 91.4, 109.7, 111.1, 123.1, 128.9, 130.2, 135.6, 137.3, 138.4, 143.8, 150.2, 159.4, 188.3; HRMS (TOF  $\text{ES}^+$ ):  $m/z$  calcd for  $\text{C}_{18}\text{H}_{15}\text{ClN}_3\text{O}_4$   $[(\text{M}+\text{H})^+]$ , 372.0746; found, 372.0753.

#### **(4-Chlorophenyl)(5-(4-fluorophenyl)-1,2,3,5-tetrahydro-6-nitroimidazo[1,2-a]pyridin-8-yl)methanone (4b)**

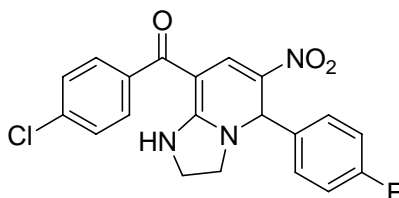

Yellow solid; Mp 267.0–269.5 °C; IR (KBr): 3312, 2889, 1588, 1408, 1224, 1072, 835  $\text{cm}^{-1}$ ;  $^1\text{H}$  NMR (500 MHz,  $\text{DMSO-}d_6$ ):  $\delta$  = 3.10–3.15 (m, 1H,  $\text{NCH}_2$ ), 3.69–3.77 (m, 3H,  $\text{NCH}_2\text{CH}_2\text{N}$ ), 5.85 (s, 1H, NCH), 7.24 (t,  $J$  = 8.8 Hz, 2H, ArH), 7.47–7.50 (m, 2H ArH), 7.59–7.63 (m, 4H, ArH), 8.03 (s, 1H, CH=), 9.35 (br, 1H, NH);  $^{13}\text{C}$  NMR (125 MHz,  $\text{DMSO-}d_6$ ):  $\delta$  = 43.6, 45.5, 57.6, 91.1, 116.0, 116.1, 125.9, 128.9, 130.1, 130.2, 134.9, 135.5, 137.1, 138.4, 158.7, 188.3; HRMS (TOF  $\text{ES}^+$ ):  $m/z$  calcd for  $\text{C}_{20}\text{H}_{16}\text{ClFN}_3\text{O}_3$   $[(\text{M}+\text{H})^+]$ , 400.0859; found, 400.0867.

#### **(4-Chlorophenyl)(5-(4-chlorophenyl)-1,2,3,5-tetrahydro-6-nitroimidazo[1,2-a]pyridin-8-yl)methanone (4c)**

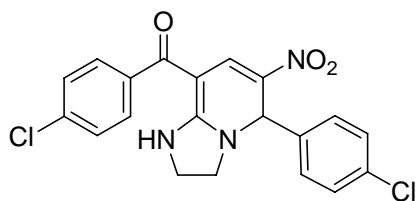

Yellow solid; Mp 167–171 °C; IR (KBr): 3281, 3073, 1589, 1409, 1217, 1080, 830  $\text{cm}^{-1}$ ;  $^1\text{H}$  NMR (500 MHz,  $\text{DMSO-}d_6$ ):  $\delta$  = 3.10–3.17 (m, 1H,  $\text{NCH}_2$ ), 3.66–3.77 (m, 3H,  $\text{NCH}_2\text{CH}_2\text{N}$ ), 5.85 (s, 1H, NCH), 7.41–7.47 (m, 4H, ArH), 7.58–7.61 (m, 4H, ArH), 8.03 (s, 1H, CH=), 9.36 (br, 1H, NH);  $^{13}\text{C}$  NMR (125 MHz,  $\text{DMSO-}d_6$ ):  $\delta$  = 43.6, 45.6, 57.7, 91.1, 125.7, 128.9, 129.2, 129.9, 130.2, 133.6, 135.6, 137.2, 137.6, 138.4, 158.7, 188.3; HRMS (TOF  $\text{ES}^+$ ):  $m/z$  calcd for  $\text{C}_{20}\text{H}_{16}\text{Cl}_2\text{N}_3\text{O}_3$  [(M+H) $^+$ ], 416.0563; found, 416.0560.

**(4-Chlorophenyl)(5-(2-chlorophenyl)-1,2,3,5-tetrahydro-6-nitroimidazo[1,2-a]pyridin-8-yl)methanone (4d)**

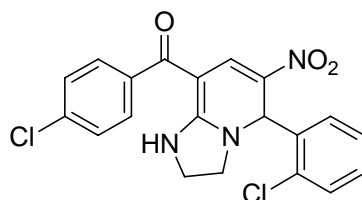

Yellow solid; Mp 279–281 °C; IR (KBr): 3298, 3052, 1588, 1409, 1293, 1221, 1076, 760  $\text{cm}^{-1}$ ;  $^1\text{H}$  NMR (500 MHz,  $\text{DMSO-}d_6$ ):  $\delta$  = 3.10–3.15 (m, 1H,  $\text{NCH}_2$ ), 3.69–3.77 (m, 3H,  $\text{NCH}_2\text{CH}_2\text{N}$ ), 6.25 (s, 1H, NCH), 7.39–7.43 (m, 2H, ArH), 7.48–7.52 (m, 1H, ArH), 7.52–7.55 (m, 1H, ArH), 7.59–7.63 (m, 4H, ArH), 8.08 (s, 1H, CH=), 9.36 (br, 1H, NH);  $^{13}\text{C}$  NMR (125 MHz,  $\text{DMSO-}d_6$ ):  $\delta$  = 43.7, 45.6, 55.3, 91.2, 125.0, 128.9, 128.9, 129.8, 130.2, 130.2, 130.8, 130.8, 133.1, 135.6, 137.8, 138.4, 158.5, 188.3; HRMS (TOF  $\text{ES}^+$ ):  $m/z$  calcd for  $\text{C}_{20}\text{H}_{16}\text{Cl}_2\text{N}_3\text{O}_3$  [(M+H) $^+$ ], 416.0563; found, 416.0562.

**(4-Chlorophenyl)(1,2,3,5-tetrahydro-6-nitro-5-phenylimidazo[1,2-a]pyridin-8-yl)methanone (4e)**

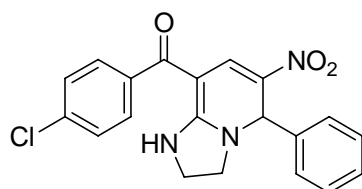

Yellow solid; Mp 260.0–265 °C; IR (KBr): 3355, 2966, 1595, 1404, 1227, 1080, 756  $\text{cm}^{-1}$ ;  $^1\text{H}$  NMR (500MHz,  $\text{CDCl}_3+\text{DMSO-}d_6$ ):  $\delta$  = 2.50–2.54 (m, 1H,  $\text{NCH}_2$ ), 2.94–2.98 (m, 1H,  $\text{NCH}_2$ ), 3.04–3.11 (m, 2H,  $\text{NCH}_2$ ), 5.04 (s, 1H, NCH), 6.63–6.71 (m, 5H, ArH), 6.75–6.78 (m, 2H, ArH), 6.80–6.84 (m, 2H, ArH), 7.38 (s, 1H, CH=),

8.59 (br, 1H, NH);  $^{13}\text{C}$  NMR (125 MHz,  $\text{CDCl}_3+\text{DMSO}-d_6$ ):  $\delta = 43.2, 45.4, 58.6, 90.5, 126.2, 127.5, 128.4, 128.7, 128.7, 128.8, 129.6, 135.8, 136.3, 137.9, 159.2, 188.2$ ; HRMS (TOF  $\text{ES}^+$ ):  $m/z$  calcd for  $\text{C}_{20}\text{H}_{17}\text{ClN}_3\text{O}_3$   $[(\text{M}+\text{H})^+]$ , 382.0953; found, 382.0950.

**(4-Chlorophenyl)(1,2,3,5-tetrahydro-5-(4-methoxyphenyl)-6-nitroimidazo[1,2-*a*]pyridin-8-yl)methanone (4f)**

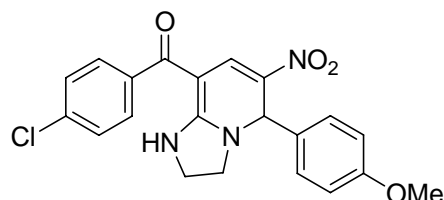

Yellow solid; Mp 233.5–235.5 °C; IR (KBr): 3332, 2964, 1590, 1506, 1404, 1233, 1077, 828  $\text{cm}^{-1}$ ;  $^1\text{H}$  NMR (500 MHz,  $\text{DMSO}-d_6$ ):  $\delta = 3.13\text{--}3.18$  (m, 1H,  $\text{NCH}_2$ ), 3.64–3.70 (m, 3H,  $\text{NCH}_2\text{CH}_2\text{N}$ ), 3.74 (s, 3H,  $\text{OCH}_3$ ), 5.74 (s, 1H, NCH), 6.95 (d,  $J = 8.6$  Hz, 2H, ArH), 7.33 (d,  $J = 8.6$  Hz, 2H, ArH), 7.57–7.60 (m, 4H, ArH), 8.00 (s, 1H, CH=), 9.27 (br, 1H, NH);  $^{13}\text{C}$  NMR (125 MHz,  $\text{DMSO}-d_6$ ):  $\delta = 43.5, 45.4, 55.5, 57.7, 91.1, 114.5, 126.4, 128.5, 128.9, 129.2, 130.2, 135.5, 136.8, 138.5, 158.8, 159.8, 188.3$ ; HRMS (TOF  $\text{ES}^+$ ):  $m/z$  calcd for  $\text{C}_{21}\text{H}_{19}\text{ClN}_3\text{O}_4$   $[(\text{M}+\text{H})^+]$ , 412.1059; found, 412.1063.

**(4-Chlorophenyl)(1,2,3,5-tetrahydro-5-(3,4-dimethoxyphenyl)-6-nitroimidazo[1,2-*a*]pyridin-8-yl)methanone (4g)**

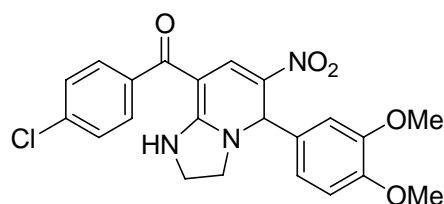

Yellow solid; Mp 178–179 °C; IR (KBr): 3372, 2971, 1597, 1514, 1399, 1213, 1168, 1079, 1025, 765  $\text{cm}^{-1}$ ;  $^1\text{H}$  NMR (500 MHz,  $\text{DMSO}-d_6$ ):  $\delta = 3.16\text{--}3.21$  (m, 1H,  $\text{NCH}_2$ ), 3.68–3.76 (m, 3H,  $\text{NCH}_2\text{CH}_2\text{N}$ ), 3.73 (s, 3H,  $\text{OCH}_3$ ), 3.77 (s, 3H,  $\text{OCH}_3$ ), 5.75 (s, 1H, NCH), 6.91–6.99 (m, 3H, ArH), 7.58–7.60 (m, 4H, ArH), 8.02 (s, 1H, CH=), 9.27 (br, 1H, NH);  $^{13}\text{C}$  NMR (125 MHz,  $\text{DMSO}-d_6$ ):  $\delta = 43.6, 45.5, 55.9, 55.9, 58.0, 91.0, 111.7, 112.4, 119.9, 126.3, 128.9, 130.2, 130.9, 135.5, 136.8, 138.5, 149.1, 149.4, 158.8, 188.1$ ; HRMS (TOF  $\text{ES}^+$ ):  $m/z$  calcd for  $\text{C}_{22}\text{H}_{21}\text{ClN}_3\text{O}_5$   $[(\text{M}+\text{H})^+]$ , 442.1164; found, 442.1167.

**(5-(Furan-2-yl)-1,2,3,5-tetrahydro-6-nitroimidazo[1,2-*a*]pyridin-8-yl)(phenyl)methanone (4h)**

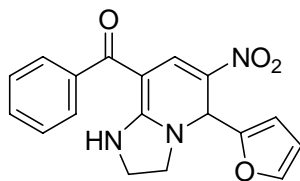

Orange-red solid; Mp 199–200 °C; IR (KBr): 3287, 3089, 1590, 1360, 1199, 1077, 1017, 745  $\text{cm}^{-1}$ ;  $^1\text{H}$  NMR (500 MHz,  $\text{DMSO-}d_6$ ):  $\delta$  = 3.22–3.26 (m, 1H,  $\text{NCH}_2$ ), 3.71–3.80 (m, 3H,  $\text{NCH}_2\text{CH}_2\text{N}$ ), 6.02 (s, 1H, NCH), 6.46–6.48 (m, 1H, ArH), 6.52–6.55 (m, 1H, ArH), 7.51–7.55 (m, 5H, ArH), 7.67–7.69 (m, 1H, ArH), 8.03 (s, 1H, CH=), 9.40 (br, 1H, NH);  $^{13}\text{C}$  NMR (125 MHz,  $\text{DMSO-}d_6$ ):  $\delta$  = 44.2, 46.4, 52.2, 92.1, 110.2, 111.6, 123.3, 128.7, 129.3, 131.3, 138.2, 140.2, 144.3, 150.8, 160.0, 190.3; HRMS (TOF  $\text{ES}^+$ ):  $m/z$  calcd for  $\text{C}_{18}\text{H}_{16}\text{N}_3\text{O}_4$   $[(\text{M}+\text{H})^+]$ , 338.1135; found, 338.1140.

**(5-(4-Fluorophenyl)-1,2,3,5-tetrahydro-6-nitroimidazo[1,2-a]pyridin-8-yl)(phenyl)methanone (4i)**

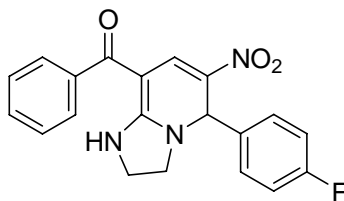

Yellow solid; Mp 222–224 °C; IR (KBr): 3328, 3060, 1592, 1295, 1223, 1168, 1074, 836, 742  $\text{cm}^{-1}$ ;  $^1\text{H}$  NMR (500 MHz,  $\text{DMSO-}d_6$ ):  $\delta$  = 3.10–3.16 (m, 1H,  $\text{NCH}_2$ ), 3.69–3.75 (m, 3H,  $\text{NCH}_2\text{CH}_2\text{N}$ ), 5.84 (s, 1H, NCH), 7.20–7.26 (m, 2H, ArH), 7.45–7.50 (m, 2H, ArH), 7.50–7.58 (m, 5H, ArH), 8.06 (s, 1H, CH=), 9.36 (br, 1H, NH);  $^{13}\text{C}$  NMR (125 MHz,  $\text{DMSO-}d_6$ ):  $\delta$  = 43.6, 45.5, 57.6, 91.3, 116.0 (d,  $J$  = 21.3 Hz), 125.6, 128.3, 128.8, 130.1, 130.8, 134.9, 137.5, 139.7, 158.8, 162.4 (d,  $J$  = 243.8 Hz), 189.7; HRMS (TOF  $\text{ES}^+$ ):  $m/z$  calcd for  $\text{C}_{20}\text{H}_{17}\text{FN}_3\text{O}_3$   $[(\text{M}+\text{H})^+]$ , 366.1248; found, 366.1252.

**(5-(4-Chlorophenyl)-1,2,3,5-tetrahydro-6-nitroimidazo[1,2-a]pyridin-8-yl)(phenyl)methanone (4j)**

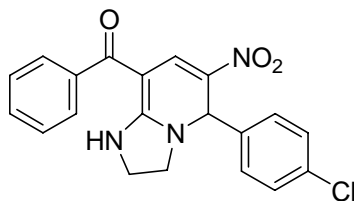

Orange-red solid; Mp 253–256 °C; IR (KBr): 3376, 2890, 1588, 1393, 1209, 1077, 821, 741  $\text{cm}^{-1}$ ;  $^1\text{H}$  NMR (500 MHz,  $\text{DMSO-}d_6$ ):  $\delta$  = 3.07–3.15 (m, 1H,  $\text{NCH}_2$ ), 3.71–3.75 (m, 3H,  $\text{NCH}_2\text{CH}_2\text{N}$ ), 5.85 (s, 1H, NCH), 7.45–7.57 (m, 9H, ArH), 8.06 (s,

1H, CH=), 9.37 (br, 1H, NH);  $^{13}\text{C}$  NMR (125 MHz, DMSO- $d_6$ ):  $\delta$  = 43.6, 45.6, 57.7, 91.3, 125.4, 128.3, 128.8, 129.2, 129.9, 130.8, 133.6, 137.6, 139.7, 139.7, 158.8, 189.7; HRMS (TOF ES $^+$ ):  $m/z$  calcd for  $\text{C}_{20}\text{H}_{17}\text{ClN}_3\text{O}_3$  [(M+H) $^+$ ], 382.0953; found, 382.0960.

**(5-(2-Chlorophenyl)-1,2,3,5-tetrahydro-6-nitroimidazo[1,2-*a*]pyridin-8-yl)(phenyl)methanone (4k)**

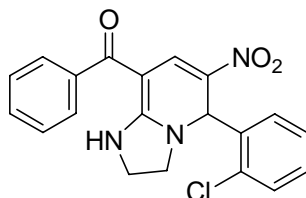

Orange-red solid; Mp 262–265 °C; IR (KBr): 3210, 2970, 1591, 1294, 1205, 1075, 748  $\text{cm}^{-1}$ ;  $^1\text{H}$  NMR (500 MHz, DMSO- $d_6$ ):  $\delta$  = 3.10–3.15 (m, 1H, NCH $_2$ ), 3.65–3.75 (m, 3H, NCH $_2$ CH $_2$ N), 6.26 (s, 1H, NCH), 7.37–7.43 (m, 2H, ArH), 7.47–7.60 (m, 7H, ArH), 8.14 (s, 1H, CH=), 9.38 (br, 1H, NH);  $^{13}\text{C}$  NMR (125 MHz, DMSO- $d_6$ ):  $\delta$  = 43.7, 45.6, 55.4, 91.4, 124.7, 128.3, 128.8, 129.8, 129.8, 130.8, 130.8, 130.8, 133.1, 135.7, 138.2, 139.7, 158.6, 189.8; HRMS (TOF ES $^+$ ):  $m/z$  calcd for  $\text{C}_{20}\text{H}_{17}\text{ClN}_3\text{O}_3$  [(M+H) $^+$ ], 382.0953; found, 382.0955.

**(1,2,3,5-Tetrahydro-6-nitro-5-phenylimidazo[1,2-*a*]pyridin-8-yl)(phenyl)methanone (4l)**

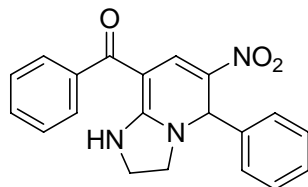

Orange-red solid; Mp 229–231 °C; IR (KBr): 3322, 3064, 1589, 1447, 1395, 1291, 1217, 1072, 743  $\text{cm}^{-1}$ ;  $^1\text{H}$  NMR (500 MHz,  $\text{CDCl}_3$ ):  $\delta$  = 3.30–3.35 (m, 1H, NCH $_2$ ), 3.54–3.3.59 (m, 1H, NCH $_2$ ), 3.75–3.81 (m, 2H, NCH $_2$ ), 5.74 (s, 1H, NCH), 7.33–7.41 (m, 5H, ArH), 7.41–7.50 (m, 3H, ArH), 7.56–7.58 (m, 2H, ArH), 8.29 (s, 1H, CH=), 9.24 (br, 1H, NH);  $^{13}\text{C}$  NMR (125 MHz,  $\text{CDCl}_3$ ):  $\delta$  = 43.4, 46.1, 59.6, 90.8, 127.5, 128.0, 128.8, 128.9, 129.7, 131.2, 132.2, 137.0, 138.0, 139.4, 161.0, 191.51; HRMS (TOF ES $^+$ ):  $m/z$  calcd for  $\text{C}_{20}\text{H}_{18}\text{N}_3\text{O}_3$  [(M+H) $^+$ ], 348.1343; found, 348.1344.

**(1,2,3,5-Tetrahydro-5-(4-methoxyphenyl)-6-nitroimidazo[1,2-*a*]pyridin-8-yl)(phenyl)methanone (4m)**



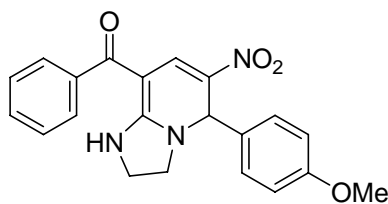

Yellow solid; Mp 253–255 °C; IR (KBr): 3368, 2958, 1592, 1508, 1395, 1210, 1026, 829, 739  $\text{cm}^{-1}$ ;  $^1\text{H}$  NMR (500 MHz,  $\text{DMSO-}d_6$ ):  $\delta$  = 3.14–3.18 (m, 1H,  $\text{NCH}_2$ ), 3.72–3.76 (m, 3H,  $\text{NCH}_2\text{CH}_2\text{N}$ ), 3.77 (s, 3H,  $\text{OCH}_3$ ), 5.77 (s, 1H, NCH), 6.97 (d,  $J$  = 7.1 Hz, 2H, ArH), 7.34 (d,  $J$  = 7.1 Hz, 2H, ArH), 7.52–7.57 (m, 5H, ArH), 8.06 (s, 1H, CH=), 9.28 (br, 1H, NH);  $^{13}\text{C}$  NMR (125 MHz,  $\text{DMSO-}d_6$ ):  $\delta$  = 43.5, 45.4, 55.5, 57.8, 91.2, 114.6, 126.1, 128.2, 128.8, 129.2, 130.6, 130.7, 137.1, 139.8, 158.9, 159.8, 189.7; HRMS (TOF  $\text{ES}^+$ ):  $m/z$  calcd for  $\text{C}_{21}\text{H}_{20}\text{N}_3\text{O}_4$   $[(\text{M}+\text{H})^+]$ , 378.1448; found, 378.1456.

**(1,2,3,5-Tetrahydro-5-(3,4-dimethoxyphenyl)-6-nitroimidazo[1,2-*a*]pyridin-8-yl)(phenyl)methanone (4n)**

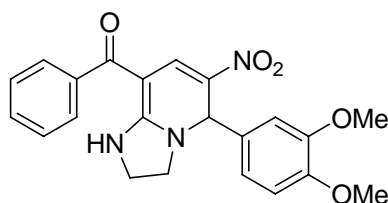

Orange-red solid; Mp 219–220.5 °C; IR (KBr): 3324, 2958, 1596, 1510, 1405, 1290, 1223, 1072, 747  $\text{cm}^{-1}$ ;  $^1\text{H}$  NMR (500 MHz,  $\text{DMSO-}d_6$ ):  $\delta$  = 3.16–3.19 (m, 1H,  $\text{NCH}_2$ ), 3.65–3.71 (m, 3H,  $\text{NCH}_2\text{CH}_2\text{N}$ ), 3.74 (s, 3H,  $\text{OCH}_3$ ), 3.76 (s, 3H,  $\text{OCH}_3$ ), 5.74 (s, 1H, NCH), 6.92–6.98 (m, 3H, ArH), 7.53–7.56 (m, 5H, ArH), 8.07 (s, 1H, CH=), 9.30 (br, 1H, NH);  $^{13}\text{C}$  NMR (125 MHz,  $\text{DMSO-}d_6$ ):  $\delta$  = 43.5, 45.5, 55.8, 55.8, 58.0, 91.3, 111.6, 112.3, 119.8, 125.9, 128.2, 128.8, 130.8, 130.9, 137.3, 139.8, 149.0, 149.3, 158.9, 189.7; HRMS (TOF  $\text{ES}^+$ ):  $m/z$  calcd for  $\text{C}_{22}\text{H}_{22}\text{N}_3\text{O}_5$   $[(\text{M}+\text{H})^+]$ , 408.1554; found, 408.1558.

**(5-(Furan-2-yl)-1,2,3,5-tetrahydro-6-nitroimidazo[1,2-*a*]pyridin-8-yl)(*p*-tolyl)methanone (4o)**

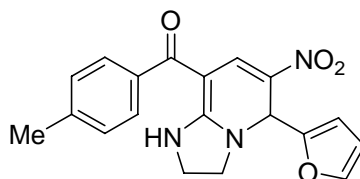

Orange-red solid; Mp 229–230 °C; IR (KBr): 3271, 2895, 1594, 1408, 1294, 1229, 1164, 1071, 747  $\text{cm}^{-1}$ ;  $^1\text{H}$  NMR (500 MHz,  $\text{DMSO-}d_6$ ):  $\delta$  = 2.40 (s, 3H,  $\text{CH}_3$ ), 3.25–3.27 (m, 1H,  $\text{NCH}_2$ ), 3.76–3.80 (m, 3H,  $\text{NCH}_2\text{CH}_2\text{N}$ ), 6.02 (s, 1H, NCH),

6.45–6.48 (m, 1H, ArH), 6.51–6.55 (m, 1H, ArH), 7.33–7.43 (m, 4H, ArH), 7.66–7.68 (m, 1H, ArH), 8.07 (s, 1H, CH=), 9.36 (br, 1H, NH);  $^{13}\text{C}$  NMR (125 MHz, DMSO- $d_6$ ):  $\delta$  = 21.4, 43.7, 45.9, 51.6, 91.7, 109.6, 111.1, 122.6, 128.4, 129.3, 136.9, 137.9, 140.8, 143.8, 150.3, 159.6, 189.7; HRMS (TOF ES $^+$ ):  $m/z$  calcd for C $_{19}$ H $_{18}$ N $_3$ O $_4$  [(M+H) $^+$ ], 352.1292; found, 352.1299.

**(5-(4-Fluorophenyl)-1,2,3,5-tetrahydro-6-nitroimidazo[1,2-*a*]pyridin-8-yl)(*p*-tolyl)methanone (4p)**

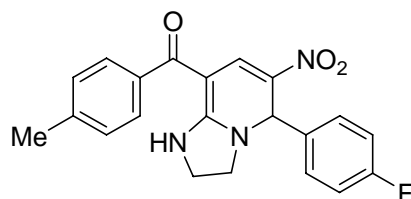

Orange-red solid; Mp 242–245°C; IR (KBr): 3314, 3064, 2888, 1598, 1405, 1292, 1231, 1072, 838, 767 cm $^{-1}$ ;  $^1\text{H}$  NMR (500 MHz, DMSO- $d_6$ ):  $\delta$  = 2.39 (s, 3H, CH $_3$ ), 3.13–3.17 (m, 1H, NCH $_2$ ), 3.70–3.75 (m, 3H, NCH $_2$ CH $_2$ N), 5.84 (s, 1H, NCH), 7.24–7.26 (m, 2H, ArH), 7.33 (d,  $J$  = 7.8 Hz, 2H, ArH), 7.47–7.49 (d,  $J$  = 7.8 Hz, 4H, ArH), 8.10 (s, 1H, CH=), 9.35 (br, 1H, NH);  $^{13}\text{C}$  NMR (125 MHz, DMSO- $d_6$ ):  $\delta$  = 21.4, 43.6, 45.5, 57.6, 91.4, 116.0 (d,  $J$  = 21.3 Hz), 125.4, 128.4, 128.9, 129.3, 130.0 (d,  $J$  = 7.5 Hz), 134.9, 136.9, 137.6, 140.8, 158.9, 162.4 (d,  $J$  = 242.5 Hz), 189.7; HRMS (TOF ES $^+$ ):  $m/z$  calcd for C $_{21}$ H $_{19}$ FN $_3$ O $_3$  [(M+H) $^+$ ], 380.1405; found, 380.1407.

**(5-(4-Chlorophenyl)-1,2,3,5-tetrahydro-6-nitroimidazo[1,2-*a*]pyridin-8-yl)(*p*-tolyl)methanone (4q)**

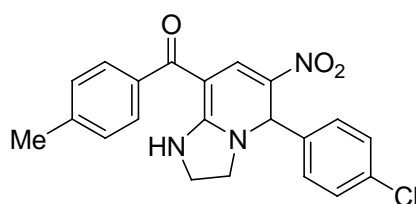

Orange-red solid; Mp 225–226 °C; IR (KBr): 3350, 2888, 1581, 1394, 1289, 1220, 1172, 1078, 828 cm $^{-1}$ ;  $^1\text{H}$  NMR (500 MHz, DMSO- $d_6$ ):  $\delta$  = 2.39 (s, 3H, CH $_3$ ), 3.12–3.16 (m, 1H, NCH $_2$ ), 3.67–3.76 (m, 3H, NCH $_2$ CH $_2$ N), 5.84 (s, 1H, NCH), 7.30 (d,  $J$  = 7.8 Hz, 2H, ArH), 7.42–7.49 (m, 6H, ArH), 8.10 (s, 1H, CH=), 9.35 (br, 1H, NH);  $^{13}\text{C}$  NMR (125 MHz, DMSO- $d_6$ ):  $\delta$  = 21.4, 43.6, 45.6, 57.7, 91.4, 125.2, 128.4, 128.9, 129.3, 129.3, 129.8, 133.6, 136.9, 137.7, 140.8, 158.9, 189.6; HRMS (TOF ES $^+$ ):  $m/z$  calcd for C $_{21}$ H $_{19}$ ClN $_3$ O $_3$  [(M+H) $^+$ ], 396.1109; found, 396.1117.

**(5-(2-Chlorophenyl)-1,2,3,5-tetrahydro-6-nitroimidazo[1,2-a]pyridin-8-yl)(*p*-tolyl)methanone (4r)**

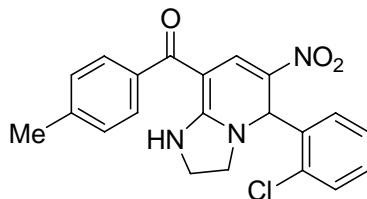

Orange-red solid; Mp 219–220.5 °C; IR (KBr): 3309, 2897, 1596, 1404, 1293, 1228, 1076, 763  $\text{cm}^{-1}$ ;  $^1\text{H}$  NMR (500 MHz,  $\text{DMSO-}d_6$ ):  $\delta$  = 2.40 (s, 3H,  $\text{CH}_3$ ), 3.10–3.15 (m, 1H,  $\text{NCH}_2$ ), 3.72–3.76 (m, 3H,  $\text{NCH}_2\text{CH}_2\text{N}$ ), 6.25 (s, 1H,  $\text{NCH}$ ), 7.33–7.43 (m, 4H,  $\text{ArH}$ ), 7.47–7.52 (m, 4H,  $\text{ArH}$ ), 8.17 (s, 1H,  $\text{CH}=\text{N}$ ), 9.37 (br, 1H,  $\text{NH}$ );  $^{13}\text{C}$  NMR (125 MHz,  $\text{DMSO-}d_6$ ):  $\delta$  = 21.4, 43.6, 45.6, 55.4, 91.4, 124.5, 128.4, 128.9, 129.3, 129.8, 129.8, 130.7, 133.1, 135.7, 136.9, 138.3, 140.8, 158.7, 189.7; HRMS (TOF  $\text{ES}^+$ ):  $m/z$  calcd for  $\text{C}_{21}\text{H}_{19}\text{ClN}_3\text{O}_3$   $[(\text{M}+\text{H})^+]$ , 396.1109; found, 396.1109.

**(1,2,3,5-Tetrahydro-6-nitro-5-phenylimidazo[1,2-a]pyridin-8-yl)(*p*-tolyl)methanone (4s)**

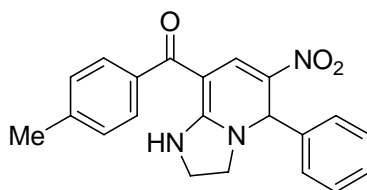

Yellow solid; Mp 257–261 °C; IR (KBr): 3372, 2884, 1591, 1396, 1215, 1073, 762  $\text{cm}^{-1}$ ;  $^1\text{H}$  NMR (500 MHz,  $\text{DMSO-}d_6$ ):  $\delta$  = 2.39 (s, 3H,  $\text{CH}_3$ ), 3.09–3.15 (m, 1H,  $\text{NCH}_2$ ), 3.69–3.73 (m, 3H,  $\text{NCH}_2\text{CH}_2\text{N}$ ), 5.81 (s, 1H,  $\text{NCH}$ ), 7.32–7.48 (m, 9H,  $\text{ArH}$ ), 8.11 (s, 1H,  $\text{CH}=\text{N}$ ), 9.34 (br, 1H,  $\text{NH}$ );  $^{13}\text{C}$  NMR (125 MHz,  $\text{DMSO-}d_6$ ):  $\delta$  = 21.9, 44.1, 46.1, 58.9, 91.9, 126.1, 128.4, 128.9, 129.5, 129.8, 129.8, 137.5, 138.0, 139.1, 141.2, 159.5, 190.1; HRMS (TOF  $\text{ES}^+$ ):  $m/z$  calcd for  $\text{C}_{21}\text{H}_{20}\text{N}_3\text{O}_3$   $[(\text{M}+\text{H})^+]$ , 362.1499; found, 362.1506.

**(1,2,3,5-Tetrahydro-5-(4-methoxyphenyl)-6-nitroimidazo[1,2-a]pyridin-8-yl)(*p*-tolyl)methanone (4t)**

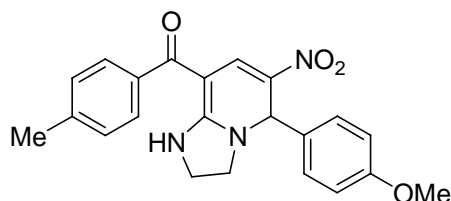

Yellow solid; Mp 246–247 °C; IR (KBr): 3328, 2889, 1591, 1506, 1395, 1209, 1168, 1028, 832, 768  $\text{cm}^{-1}$ ;  $^1\text{H}$  NMR (500 MHz,  $\text{DMSO-}d_6$ ):  $\delta$  = 2.40 (s, 3H,  $\text{CH}_3$ ),

3.12–3.16 (m, 1H, NCH<sub>2</sub>), 3.70–3.74 (m, 3H, NCH<sub>2</sub>CH<sub>2</sub>N), 3.76 (s, 3H, OCH<sub>3</sub>), 5.76 (s, 1H, NCH), 6.96 (d, *J* = 7.4 Hz, 2H, ArH), 7.30–7.36 (m, 4H, ArH), 7.47 (d, *J* = 7.4 Hz, 2H, ArH), 8.09 (s, 1H, CH=), 9.28 (br, 1H, NH); <sup>13</sup>C NMR (125 MHz, DMSO-*d*<sub>6</sub>):  $\delta$  = 21.4, 43.5, 45.4, 55.5, 57.8, 91.3, 114.6, 125.9, 128.4, 129.1, 129.3, 130.6, 137.0, 137.2, 140.7, 159.0, 159.8, 189.6; HRMS (TOF ES<sup>+</sup>): *m/z* calcd for C<sub>22</sub>H<sub>22</sub>N<sub>3</sub>O<sub>4</sub> [(M+H)<sup>+</sup>], 392.1605; found, 392.1605.

**(1,2,3,5-Tetrahydro-5-(3,4-dimethoxyphenyl)-6-nitroimidazo[1,2-*a*]pyridin-8-yl)(*p*-tolyl)methanone (4u)**

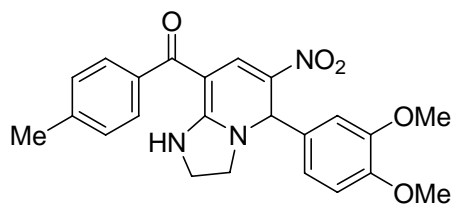

Yellow solid; Mp 172–174.5 °C; IR (KBr): 3313, 2947, 1595, 1512, 1406, 1289, 1223, 1073, 1024, 833, 765 cm<sup>-1</sup>; <sup>1</sup>H NMR (500 MHz, DMSO-*d*<sub>6</sub>):  $\delta$  = 2.38 (s, 3H, CH<sub>3</sub>), 3.16–3.20 (m, 1H, NCH<sub>2</sub>), 3.65–3.73 (m, 3H, NCH<sub>2</sub>CH<sub>2</sub>N), 3.75 (s, 3H, OCH<sub>3</sub>), 3.76 (s, 3H, OCH<sub>3</sub>), 5.74 (s, 1H, NCH), 6.92–7.00 (m, 3H, ArH), 7.33 (d, *J* = 7.8 Hz, 2H, ArH), 7.47 (d, *J* = 7.8 Hz, 2H, ArH), 8.12 (s, 1H, CH=), 9.29 (br, 1H, NH); <sup>13</sup>C NMR (125 MHz, DMSO-*d*<sub>6</sub>):  $\delta$  = 21.3, 43.5, 45.5, 55.9, 58.1, 91.3, 111.7, 112.4, 119.9, 125.8, 128.4, 129.3, 131.0, 137.0, 137.3, 140.8, 149.1, 149.4, 159.0, 159.3, 189.6; HRMS (TOF ES<sup>+</sup>): *m/z* calcd for C<sub>23</sub>H<sub>24</sub>N<sub>3</sub>O<sub>5</sub> [(M+H)<sup>+</sup>], 422.1710; found, 422.1709.

**(5-(Furan-2-yl)-1,2,3,5-tetrahydro-6-nitroimidazo[1,2-*a*]pyridin-8-yl)(4-methoxyphenyl)methanone (4v)**

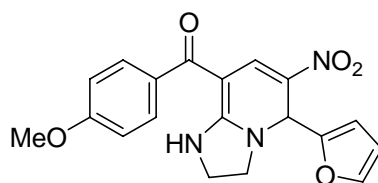

Orange-red solid; Mp 218–220.5 °C; IR (KBr): 3321, 2991, 1595, 1298, 1235, 1167, 1019, 770, 610 cm<sup>-1</sup>; <sup>1</sup>H NMR (500 MHz, DMSO-*d*<sub>6</sub>):  $\delta$  = 3.23–3.27 (m, 1H, NCH<sub>2</sub>), 3.71–3.81 (m, 3H, NCH<sub>2</sub>CH<sub>2</sub>N), 3.84 (s, 3H, OCH<sub>3</sub>), 6.02 (s, 1H, NCH), 6.47 (d, *J* = 2.6 Hz, 1H, ArH), 6.52–6.55 (m, 1H, ArH), 7.08 (d, *J* = 8.6 Hz, 2H, ArH), 7.53 (d, *J* = 8.6 Hz, 2H, ArH), 7.67–7.69 (m, 1H, ArH), 8.11 (s, 1H, CH=), 9.37 (br, 1H, NH); <sup>13</sup>C NMR (125 MHz, DMSO-*d*<sub>6</sub>):  $\delta$  = 43.7, 45.9, 51.6, 55.7, 91.8, 109.6, 111.1, 114.1, 122.3, 130.4, 131.9, 143.8, 143.8, 150.3, 159.6, 161.6, 189.0. HRMS (TOF ES<sup>+</sup>): *m/z* calcd for C<sub>19</sub>H<sub>18</sub>N<sub>3</sub>O<sub>5</sub> [(M+H)<sup>+</sup>], 368.1241; found, 368.1245.

**(5-(4-Fluorophenyl)-1,2,3,5-tetrahydro-6-nitroimidazo[1,2-*a*]pyridin-8-yl)(4-methoxyphenyl)methanone (4w)**

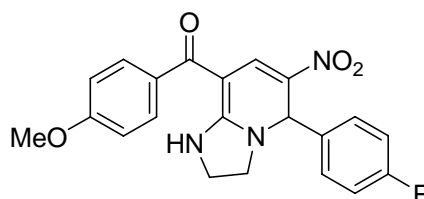

Orange-red solid; Mp 201–204 °C; IR (KBr): 3316, 2897, 1593, 1507, 1403, 1222, 1165, 1076, 839  $\text{cm}^{-1}$ ;  $^1\text{H}$  NMR (500 MHz,  $\text{DMSO-}d_6$ ):  $\delta$  = 3.12–3.16 (m, 1H,  $\text{NCH}_2$ ), 3.70–3.75 (m, 3H,  $\text{NCH}_2\text{CH}_2\text{N}$ ), 3.85 (s, 3H,  $\text{OCH}_3$ ), 5.85 (s, 1H,  $\text{NCH}$ ), 7.06–7.09 (m, 2H, ArH), 7.22–7.26 (m, 2H, ArH), 7.46–7.50 (m, 2H, ArH), 7.54–7.59 (m, 2H, ArH), 8.15 (s, 1H,  $\text{CH}=\text{)$ , 9.31 (br, 1H,  $\text{NH}$ );  $^{13}\text{C}$  NMR (125 MHz,  $\text{DMSO-}d_6$ ):  $\delta$  = 43.6, 45.5, 55.7, 57.6, 91.4, 114.0, 116.0 (d,  $J$  = 21.3 Hz), 125.2, 130.0 (d,  $J$  = 7.5 Hz), 130.4, 131.9, 135.9, 137.6, 159.0, 161.6, 163.4, 188.9; HRMS (TOF  $\text{ES}^+$ ):  $m/z$  calcd for  $\text{C}_{21}\text{H}_{19}\text{FN}_3\text{O}_4$  [ $(\text{M}+\text{H})^+$ ], 396.1354; found, 396.1363.

**(1,2,3,5-Tetrahydro-6-nitro-5-phenylimidazo[1,2-*a*]pyridin-8-yl)(4-methoxyphenyl)methanone (4x)**

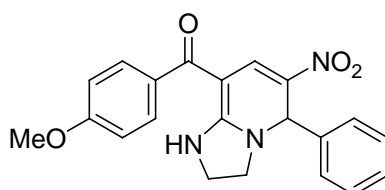

Orange-red solid; Mp 237–239 °C; IR (KBr): 3360, 2890, 1591, 1399, 1214, 1072, 836  $\text{cm}^{-1}$ ;  $^1\text{H}$  NMR (500 MHz,  $\text{DMSO-}d_6$ ):  $\delta$  = 3.10–3.14 (m, 1H,  $\text{NCH}_2$ ), 3.69–3.73 (m, 3H,  $\text{NCH}_2\text{CH}_2\text{N}$ ), 3.85 (s, 3H,  $\text{OCH}_3$ ), 5.82 (s, 1H,  $\text{NCH}$ ), 7.08 (d,  $J$  = 7.5 Hz, 2H, ArH), 7.36–7.43 (m, 5H, ArH), 7.56 (d,  $J$  = 7.5 Hz, 2H, ArH), 8.15 (s, 1H,  $\text{CH}=\text{)$ , 9.31 (br, 1H,  $\text{NH}$ );  $^{13}\text{C}$  NMR (125 MHz,  $\text{DMSO-}d_6$ ):  $\delta$  = 43.6, 45.6, 55.7, 58.4, 91.4, 114.1, 125.4, 127.9, 129.0, 129.2, 130.4, 132.0, 137.6, 138.6, 159.1, 161.5, 188.9; HRMS (TOF  $\text{ES}^+$ ):  $m/z$  calcd for  $\text{C}_{21}\text{H}_{20}\text{N}_3\text{O}_4$  [ $(\text{M}+\text{H})^+$ ], 378.1448; found, 378.1453.

**Ethyl 1,2,3,5-tetrahydro-6-nitro-5-phenylimidazo[1,2-*a*]pyridine-8-carboxylate (4y)**

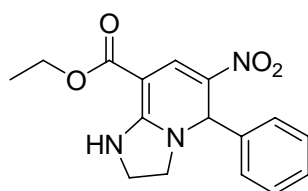

Orange-red solid; Mp 182–185 °C; IR (KBr): 3360, 2897, 1668, 1564, 1404, 1334, 1215, 1147, 770  $\text{cm}^{-1}$ ;  $^1\text{H}$  NMR (500 MHz,  $\text{DMSO-}d_6$ ):  $\delta$  = 1.29 (t,  $J$  = 6.6 Hz,  $\text{CH}_3$ ), 3.05–3.09 (m, 1H,  $\text{NCH}_2$ ), 3.63–3.67 (m, 3H,  $\text{NCH}_2\text{CH}_2\text{N}$ ), 4.19 (t,  $J$  = 6.6 Hz, 2H,  $\text{CH}_2$ ), 5.78 (s, 1H,  $\text{NCH}$ ), 7.32–7.39 (m, 5H, ArH), 8.35 (s, 1H,  $\text{CH}=\text{}$ ), 8.51 (br, 1H, NH);  $^{13}\text{C}$  NMR (125 MHz,  $\text{DMSO-}d_6$ ):  $\delta$  = 14.8, 43.3, 45.9, 58.6, 59.7, 80.8, 125.0, 127.7, 128.9, 129.1, 135.7, 138.8, 158.4, 164.7; HRMS (TOF  $\text{ES}^+$ ):  $m/z$  calcd for  $\text{C}_{16}\text{H}_{18}\text{N}_3\text{O}_4$  [(M+H) $^+$ ], 316.1292; found, 316.1302.

### X-ray Structure and Data<sup>4</sup> of 4f

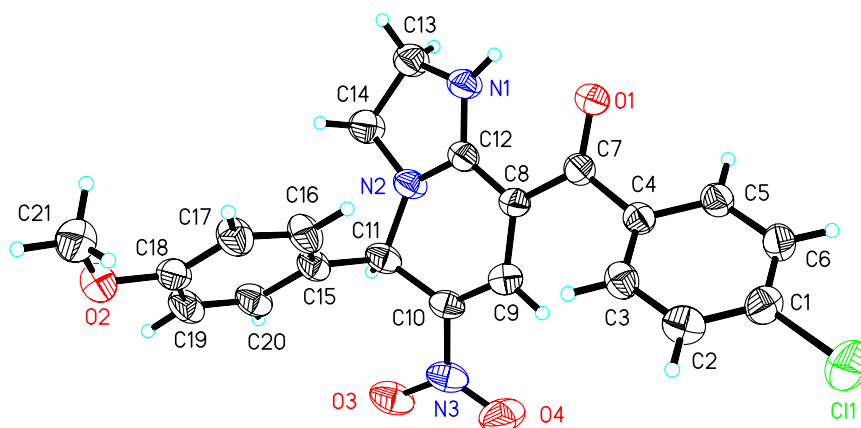

**Figure S1** X-Ray crystal structure of **4f**

**Table S1** Crystal data and structure refinement for **4f**

|                                 |                                                                                                                                   |
|---------------------------------|-----------------------------------------------------------------------------------------------------------------------------------|
| Identification code             | 100112a_0m                                                                                                                        |
| Empirical formula               | C <sub>21</sub> H <sub>18</sub> Cl N <sub>3</sub> O <sub>4</sub>                                                                  |
| Formula weight                  | 411.83                                                                                                                            |
| Temperature                     | 293(2) K                                                                                                                          |
| Wavelength                      | 0.71073 Å                                                                                                                         |
| Crystal system, space group     | Monoclinic, P2(1)/c                                                                                                               |
| Unit cell dimensions            | a = 8.587(5) Å    alpha = 90.000(5) deg.<br>b = 18.369(5) Å    beta = 92.329(5) deg.<br>c = 12.335(5) Å    gamma = 90.000(5) deg. |
| Volume                          | 1944.0(15) Å <sup>3</sup>                                                                                                         |
| Z, Calculated density           | 4, 1.407 Mg/m <sup>3</sup>                                                                                                        |
| Absorption coefficient          | 0.230 mm <sup>-1</sup>                                                                                                            |
| F(000)                          | 856                                                                                                                               |
| Crystal size                    | 0.34 x 0.29 x 0.18 mm                                                                                                             |
| Theta range for data collection | 1.99 to 28.40 deg.                                                                                                                |
| Limiting indices                | -9 ≤ h ≤ 11, -23 ≤ k ≤ 23, -15 ≤ l ≤ 16                                                                                           |
| Reflection collected/unique     | 13201 / 4601 [R(int) = 0.0509]                                                                                                    |
| Completeness to theta = 28.40   | 96.2 %                                                                                                                            |

|                                   |                                             |
|-----------------------------------|---------------------------------------------|
| Absorption correction             | Semi-empirical from equivalents             |
| Max. and min. transmission        | 0.9785 and 0.9456                           |
| Refinement method                 | Full-matrix least-squares on F <sup>2</sup> |
| Data/restraints/parameters        | 4601 / 0 / 264                              |
| Goodness-of-fit on F <sup>2</sup> | 0.937                                       |
| Final R indices [I > 2σ(I)]       | R1 = 0.0479, wR2 = 0.1085                   |
| R indices (all data)              | R1 = 0.1427, wR2 = 0.1450                   |
| Extinction coefficient            | 0.0163(16)                                  |
| Largest diff. peak and hole       | 0.153 and -0.188 e.Å <sup>-3</sup>          |

---

**Table S2** Bond lengths [Å] and angles [deg] for **4f**

---

|            |          |
|------------|----------|
| C(1)-C(6)  | 1.372(3) |
| C(1)-C(2)  | 1.374(4) |
| C(1)-Cl(1) | 1.740(3) |
| N(1)-C(12) | 1.325(3) |
| N(1)-C(13) | 1.460(3) |
| N(1)-H(1)  | 0.8600   |
| O(1)-C(7)  | 1.245(3) |
| C(2)-C(3)  | 1.382(3) |
| C(2)-H(2)  | 0.9300   |
| N(2)-C(12) | 1.337(3) |
| N(2)-C(11) | 1.468(3) |
| N(2)-C(14) | 1.471(3) |
| O(2)-C(18) | 1.372(3) |
| O(2)-C(21) | 1.424(3) |
| C(3)-C(4)  | 1.389(3) |
| C(3)-H(3)  | 0.9300   |
| N(3)-O(4)  | 1.239(3) |
| N(3)-O(3)  | 1.248(3) |
| N(3)-C(10) | 1.425(3) |
| C(4)-C(5)  | 1.387(3) |
| C(4)-C(7)  | 1.495(3) |
| C(5)-C(6)  | 1.372(3) |
| C(5)-H(5)  | 0.9300   |

---



---

|                  |          |
|------------------|----------|
| C(6)-H(6)        | 0.9300   |
| C(7)-C(8)        | 1.432(3) |
| C(8)-C(9)        | 1.410(3) |
| C(8)-C(12)       | 1.424(3) |
| C(9)-C(10)       | 1.355(3) |
| C(9)-H(9)        | 0.9300   |
| C(10)-C(11)      | 1.509(3) |
| C(11)-C(15)      | 1.524(3) |
| C(11)-H(11)      | 0.9800   |
| C(13)-C(14)      | 1.519(3) |
| C(13)-H(13A)     | 0.9700   |
| C(13)-H(13B)     | 0.9700   |
| C(14)-H(14A)     | 0.9700   |
| C(14)-H(14B)     | 0.9700   |
| C(15)-C(16)      | 1.375(3) |
| C(15)-C(20)      | 1.387(3) |
| C(16)-C(17)      | 1.382(3) |
| C(16)-H(16)      | 0.9300   |
| C(17)-C(18)      | 1.377(3) |
| C(17)-H(17)      | 0.9300   |
| C(18)-C(19)      | 1.376(3) |
| C(19)-C(20)      | 1.373(3) |
| C(19)-H(19)      | 0.9300   |
| C(20)-H(20)      | 0.9300   |
| C(21)-H(21A)     | 0.9600   |
| C(21)-H(21B)     | 0.9600   |
| C(21)-H(21C)     | 0.9600   |
| C(6)-C(1)-C(2)   | 121.0(2) |
| C(6)-C(1)-Cl(1)  | 119.3(2) |
| C(2)-C(1)-Cl(1)  | 119.7(2) |
| C(12)-N(1)-C(13) | 111.9(2) |
| C(12)-N(1)-H(1)  | 124.0    |
| C(13)-N(1)-H(1)  | 124.0    |
| C(1)-C(2)-C(3)   | 119.5(3) |

---

---

|                  |            |
|------------------|------------|
| C(1)-C(2)-H(2)   | 120.3      |
| C(3)-C(2)-H(2)   | 120.3      |
| C(12)-N(2)-C(11) | 124.3(2)   |
| C(12)-N(2)-C(14) | 110.50(19) |
| C(11)-N(2)-C(14) | 121.6(2)   |
| C(18)-O(2)-C(21) | 117.9(2)   |
| C(2)-C(3)-C(4)   | 120.5(2)   |
| C(2)-C(3)-H(3)   | 119.8      |
| C(4)-C(3)-H(3)   | 119.8      |
| O(4)-N(3)-O(3)   | 122.5(2)   |
| O(4)-N(3)-C(10)  | 120.3(2)   |
| O(3)-N(3)-C(10)  | 117.2(3)   |
| C(5)-C(4)-C(3)   | 118.5(2)   |
| C(5)-C(4)-C(7)   | 117.7(2)   |
| C(3)-C(4)-C(7)   | 123.6(2)   |
| C(6)-C(5)-C(4)   | 121.2(2)   |
| C(6)-C(5)-H(5)   | 119.4      |
| C(4)-C(5)-H(5)   | 119.4      |
| C(1)-C(6)-C(5)   | 119.3(2)   |
| C(1)-C(6)-H(6)   | 120.4      |
| C(5)-C(6)-H(6)   | 120.4      |
| O(1)-C(7)-C(8)   | 121.9(2)   |
| O(1)-C(7)-C(4)   | 116.9(2)   |
| C(8)-C(7)-C(4)   | 121.2(2)   |
| C(9)-C(8)-C(12)  | 114.3(2)   |
| C(9)-C(8)-C(7)   | 124.8(2)   |
| C(12)-C(8)-C(7)  | 119.9(2)   |
| C(10)-C(9)-C(8)  | 122.5(2)   |
| C(10)-C(9)-H(9)  | 118.7      |
| C(8)-C(9)-H(9)   | 118.7      |
| C(9)-C(10)-N(3)  | 119.6(2)   |
| C(9)-C(10)-C(11) | 123.4(2)   |
| N(3)-C(10)-C(11) | 117.0(2)   |
| N(2)-C(11)-C(10) | 105.8(2)   |

---

---

|                     |          |
|---------------------|----------|
| N(2)-C(11)-C(15)    | 111.8(2) |
| C(10)-C(11)-C(15)   | 116.0(2) |
| N(2)-C(11)-H(11)    | 107.7    |
| C(10)-C(11)-H(11)   | 107.7    |
| C(15)-C(11)-H(11)   | 107.7    |
| N(1)-C(12)-N(2)     | 110.2(2) |
| N(1)-C(12)-C(8)     | 127.4(2) |
| N(2)-C(12)-C(8)     | 122.3(2) |
| N(1)-C(13)-C(14)    | 102.3(2) |
| N(1)-C(13)-H(13A)   | 111.3    |
| C(14)-C(13)-H(13A)  | 111.3    |
| N(1)-C(13)-H(13B)   | 111.3    |
| C(14)-C(13)-H(13B)  | 111.3    |
| H(13A)-C(13)-H(13B) | 109.2    |
| N(2)-C(14)-C(13)    | 102.7(2) |
| N(2)-C(14)-H(14A)   | 111.2    |
| C(13)-C(14)-H(14A)  | 111.2    |
| N(2)-C(14)-H(14B)   | 111.2    |
| C(13)-C(14)-H(14B)  | 111.2    |
| H(14A)-C(14)-H(14B) | 109.1    |
| C(16)-C(15)-C(20)   | 117.3(2) |
| C(16)-C(15)-C(11)   | 122.1(2) |
| C(20)-C(15)-C(11)   | 120.5(2) |
| C(15)-C(16)-C(17)   | 121.9(2) |
| C(15)-C(16)-H(16)   | 119.0    |
| C(17)-C(16)-H(16)   | 119.0    |
| C(18)-C(17)-C(16)   | 119.8(3) |
| C(18)-C(17)-H(17)   | 120.1    |
| C(16)-C(17)-H(17)   | 120.1    |
| O(2)-C(18)-C(19)    | 115.7(2) |
| O(2)-C(18)-C(17)    | 125.1(3) |
| C(19)-C(18)-C(17)   | 119.2(3) |
| C(20)-C(19)-C(18)   | 120.4(2) |
| C(20)-C(19)-H(19)   | 119.8    |

---

---

|                     |          |
|---------------------|----------|
| C(18)-C(19)-H(19)   | 119.8    |
| C(19)-C(20)-C(15)   | 121.4(3) |
| C(19)-C(20)-H(20)   | 119.3    |
| C(15)-C(20)-H(20)   | 119.3    |
| O(2)-C(21)-H(21A)   | 109.5    |
| O(2)-C(21)-H(21B)   | 109.5    |
| H(21A)-C(21)-H(21B) | 109.5    |
| O(2)-C(21)-H(21C)   | 109.5    |
| H(21A)-C(21)-H(21C) | 109.5    |
| H(21B)-C(21)-H(21C) | 109.5    |

---

Symmetry transformations used to generate equivalent atoms:

**Table S3** Torsion angles [deg] for **4f**

---

|                       |             |
|-----------------------|-------------|
| C(6)-C(1)-C(2)-C(3)   | 1.0(4)      |
| Cl(1)-C(1)-C(2)-C(3)  | -177.73(18) |
| C(1)-C(2)-C(3)-C(4)   | -1.0(4)     |
| C(2)-C(3)-C(4)-C(5)   | -0.7(3)     |
| C(2)-C(3)-C(4)-C(7)   | -176.3(2)   |
| C(3)-C(4)-C(5)-C(6)   | 2.4(3)      |
| C(7)-C(4)-C(5)-C(6)   | 178.3(2)    |
| C(2)-C(1)-C(6)-C(5)   | 0.7(4)      |
| Cl(1)-C(1)-C(6)-C(5)  | 179.42(19)  |
| C(4)-C(5)-C(6)-C(1)   | -2.4(4)     |
| C(5)-C(4)-C(7)-O(1)   | -39.3(3)    |
| C(3)-C(4)-C(7)-O(1)   | 136.4(2)    |
| C(5)-C(4)-C(7)-C(8)   | 138.8(2)    |
| C(3)-C(4)-C(7)-C(8)   | -45.5(3)    |
| O(1)-C(7)-C(8)-C(9)   | 165.5(2)    |
| C(4)-C(7)-C(8)-C(9)   | -12.6(4)    |
| O(1)-C(7)-C(8)-C(12)  | -2.1(4)     |
| C(4)-C(7)-C(8)-C(12)  | 179.8(2)    |
| C(12)-C(8)-C(9)-C(10) | -9.8(3)     |
| C(7)-C(8)-C(9)-C(10)  | -178.0(2)   |
| C(8)-C(9)-C(10)-N(3)  | 170.2(2)    |
| C(8)-C(9)-C(10)-C(11) | -7.4(4)     |
| O(4)-N(3)-C(10)-C(9)  | -6.9(4)     |
| O(3)-N(3)-C(10)-C(9)  | 173.1(2)    |

---

---

|                         |           |
|-------------------------|-----------|
| O(4)-N(3)-C(10)-C(11)   | 170.8(2)  |
| O(3)-N(3)-C(10)-C(11)   | -9.2(3)   |
| C(12)-N(2)-C(11)-C(10)  | -30.6(3)  |
| C(14)-N(2)-C(11)-C(10)  | 172.9(2)  |
| C(12)-N(2)-C(11)-C(15)  | 96.5(3)   |
| C(14)-N(2)-C(11)-C(15)  | -60.0(3)  |
| C(9)-C(10)-C(11)-N(2)   | 25.5(3)   |
| N(3)-C(10)-C(11)-N(2)   | -152.1(2) |
| C(9)-C(10)-C(11)-C(15)  | -99.1(3)  |
| N(3)-C(10)-C(11)-C(15)  | 83.3(3)   |
| C(13)-N(1)-C(12)-N(2)   | -3.6(3)   |
| C(13)-N(1)-C(12)-C(8)   | 172.9(2)  |
| C(11)-N(2)-C(12)-N(1)   | -165.7(2) |
| C(14)-N(2)-C(12)-N(1)   | -7.0(3)   |
| C(11)-N(2)-C(12)-C(8)   | 17.5(4)   |
| C(14)-N(2)-C(12)-C(8)   | 176.3(2)  |
| C(9)-C(8)-C(12)-N(1)    | -171.0(2) |
| C(7)-C(8)-C(12)-N(1)    | -2.1(4)   |
| C(9)-C(8)-C(12)-N(2)    | 5.2(3)    |
| C(7)-C(8)-C(12)-N(2)    | 174.0(2)  |
| C(12)-N(1)-C(13)-C(14)  | 11.9(3)   |
| C(12)-N(2)-C(14)-C(13)  | 13.8(3)   |
| C(11)-N(2)-C(14)-C(13)  | 173.3(2)  |
| N(1)-C(13)-C(14)-N(2)   | -14.6(3)  |
| N(2)-C(11)-C(15)-C(16)  | -47.5(3)  |
| C(10)-C(11)-C(15)-C(16) | 73.9(3)   |
| N(2)-C(11)-C(15)-C(20)  | 129.9(2)  |
| C(10)-C(11)-C(15)-C(20) | -108.8(3) |
| C(20)-C(15)-C(16)-C(17) | -0.7(4)   |
| C(11)-C(15)-C(16)-C(17) | 176.7(2)  |
| C(15)-C(16)-C(17)-C(18) | 1.0(4)    |
| C(21)-O(2)-C(18)-C(19)  | -173.5(2) |
| C(21)-O(2)-C(18)-C(17)  | 7.3(4)    |
| C(16)-C(17)-C(18)-O(2)  | 179.4(2)  |
| C(16)-C(17)-C(18)-C(19) | 0.2(4)    |
| O(2)-C(18)-C(19)-C(20)  | 179.1(2)  |
| C(17)-C(18)-C(19)-C(20) | -1.6(4)   |
| C(18)-C(19)-C(20)-C(15) | 2.0(4)    |

---

|                         |           |
|-------------------------|-----------|
| C(16)-C(15)-C(20)-C(19) | -0.8(4)   |
| C(11)-C(15)-C(20)-C(19) | -178.2(2) |

**Table S4** Hydrogen bonds for **4f** [A and deg.]

| D-H...A                        | d(D-H) | d(H...A) | d(D...A) | <(DHA) |
|--------------------------------|--------|----------|----------|--------|
| C(11)-H(11)...O(3)             | 0.98   | 2.45     | 3.342(3) | 151.2  |
| N(1)-H(1)...O(1) <sup>i</sup>  | 0.86   | 2.13     | 2.841(3) | 140.2  |
| N(1)-H(1)...O(1) <sup>ii</sup> | 0.86   | 2.15     | 2.683(3) | 120.0  |

**<sup>1</sup>H NMR and <sup>13</sup>C NMR Spectra for Tetrahydroimidazo[1,2-*a*]pyridine**

**Derivatives 4**

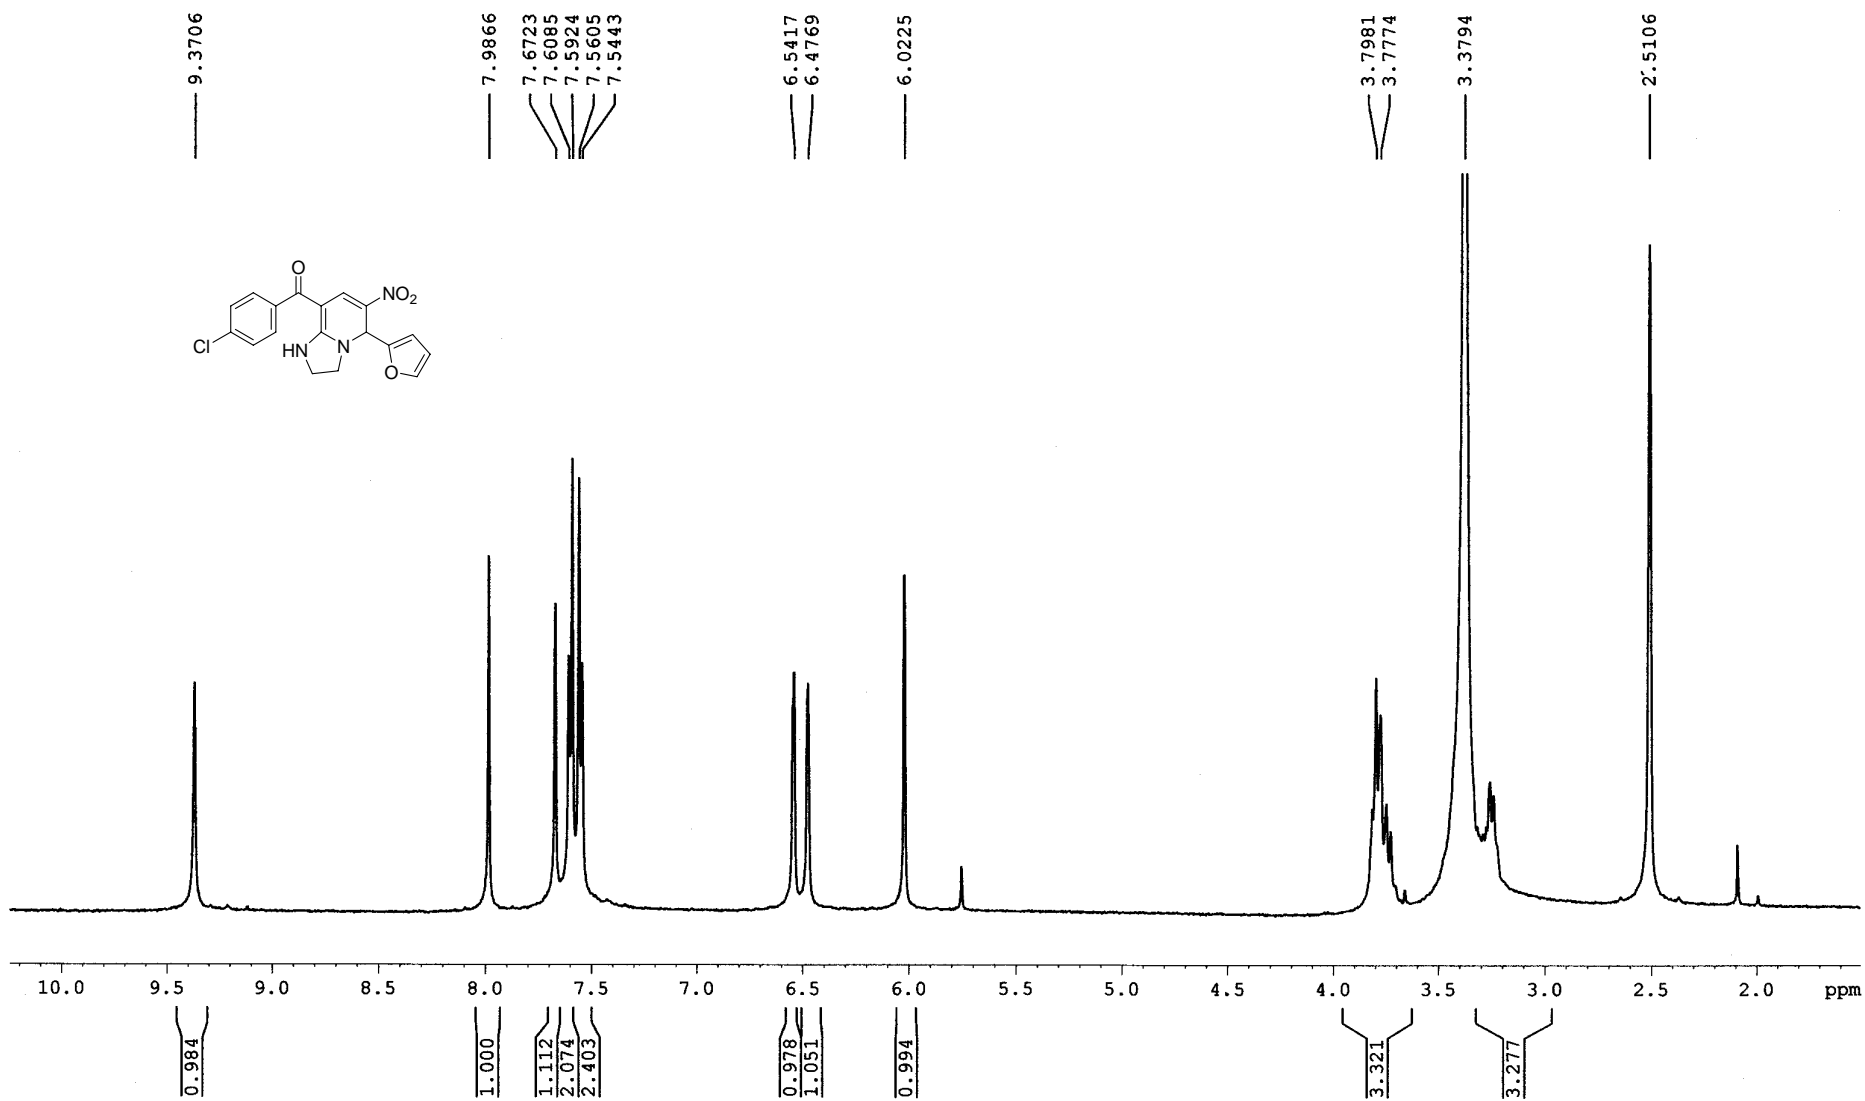

Figure 1. <sup>1</sup>H NMR (500 MHz, DMSO-*d*<sub>6</sub>) spectra of compound 4a

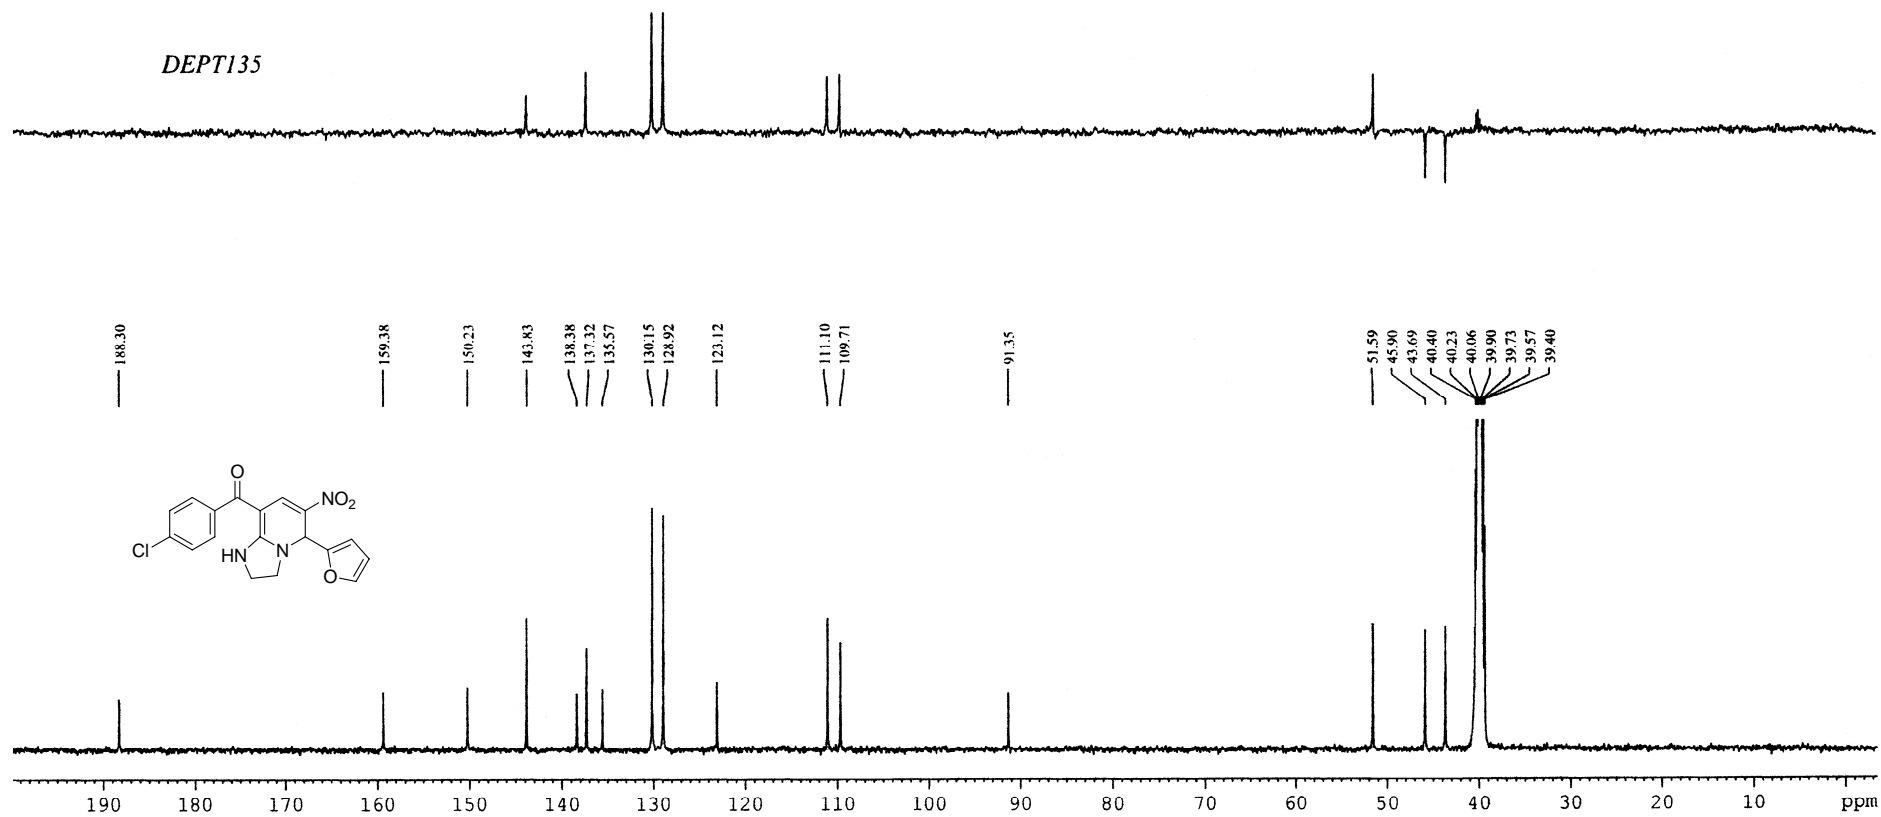

Figure 2.  $^{13}\text{C}$  NMR (125 MHz,  $\text{DMSO-}d_6$ ) spectra of compound 4a



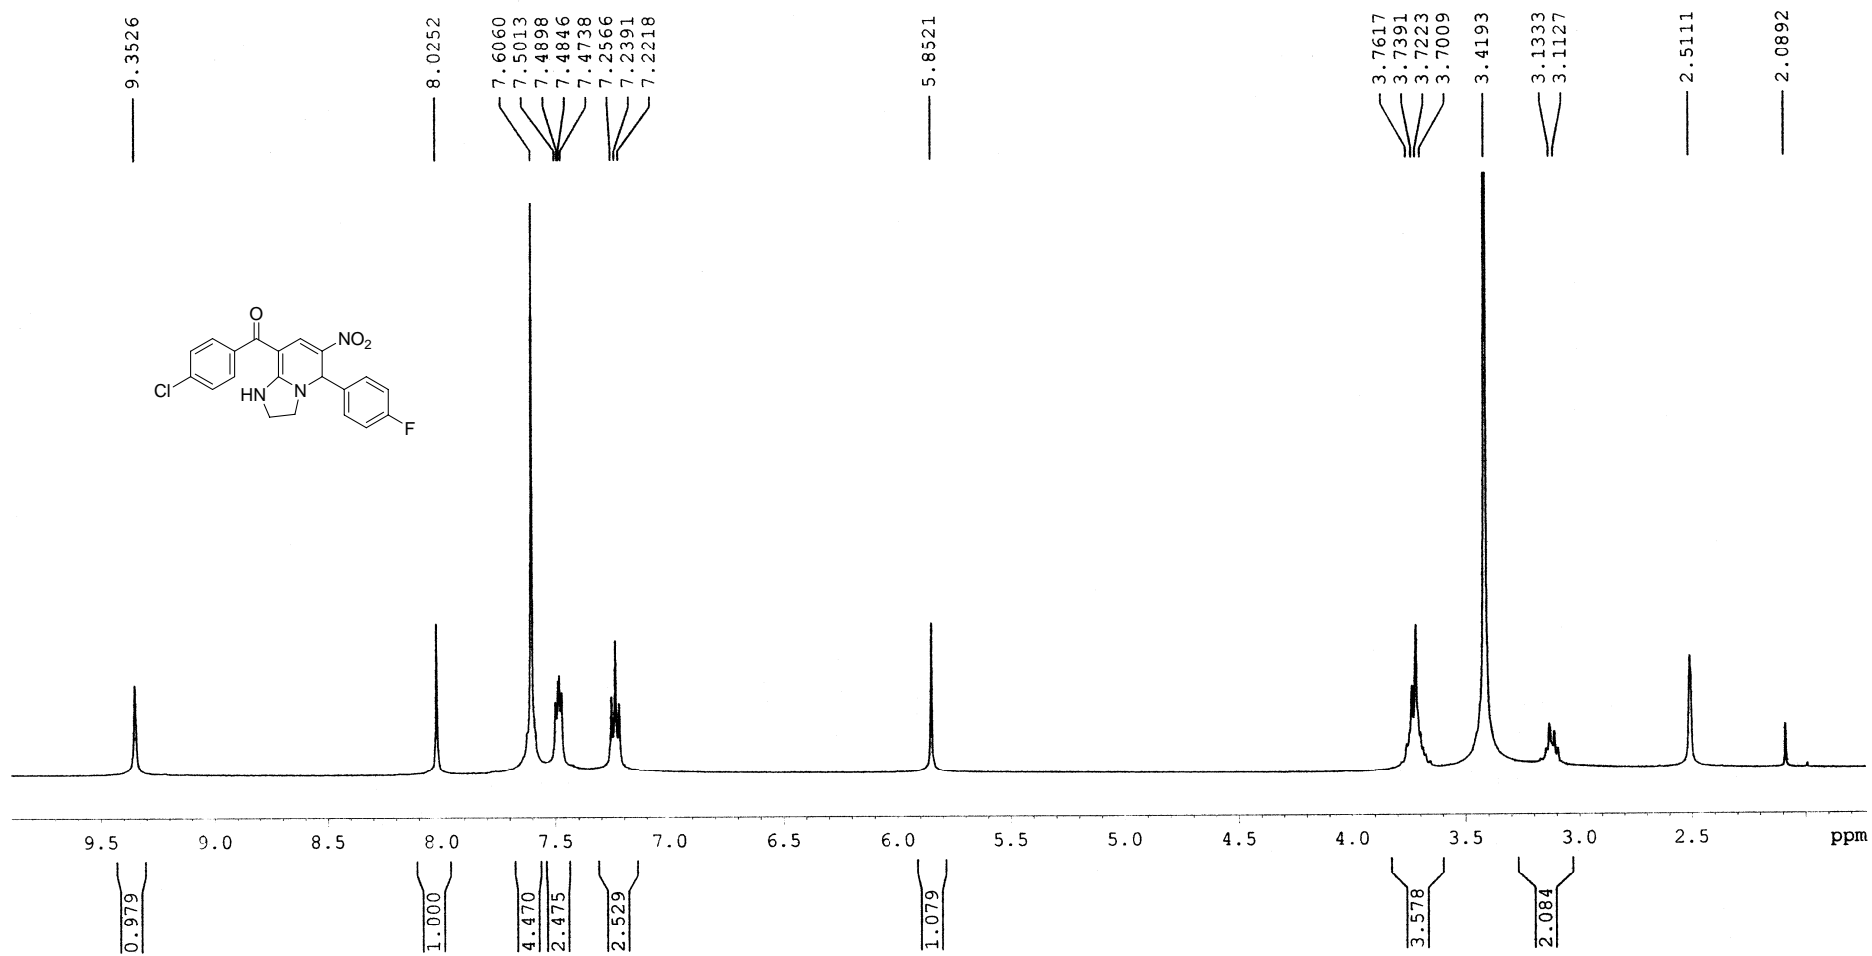

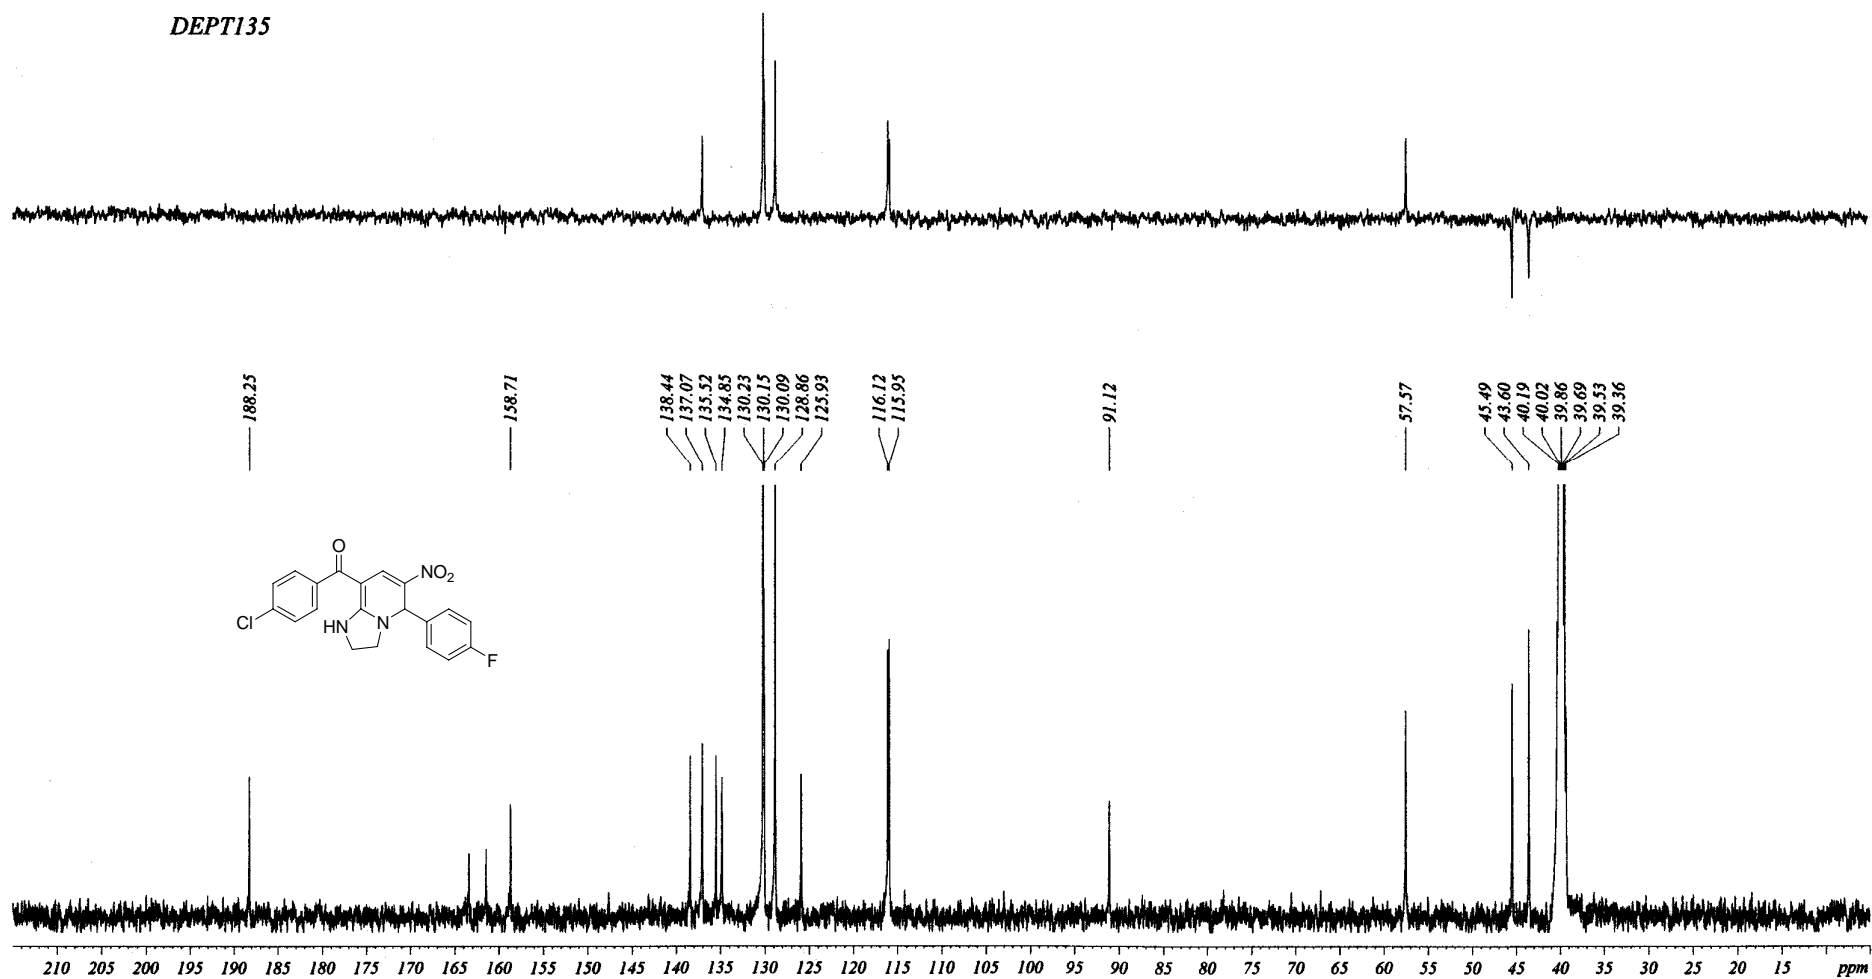

Figure 4.  $^{13}\text{C}$  NMR (125 MHz,  $\text{DMSO-}d_6$ ) spectra of compound 4b

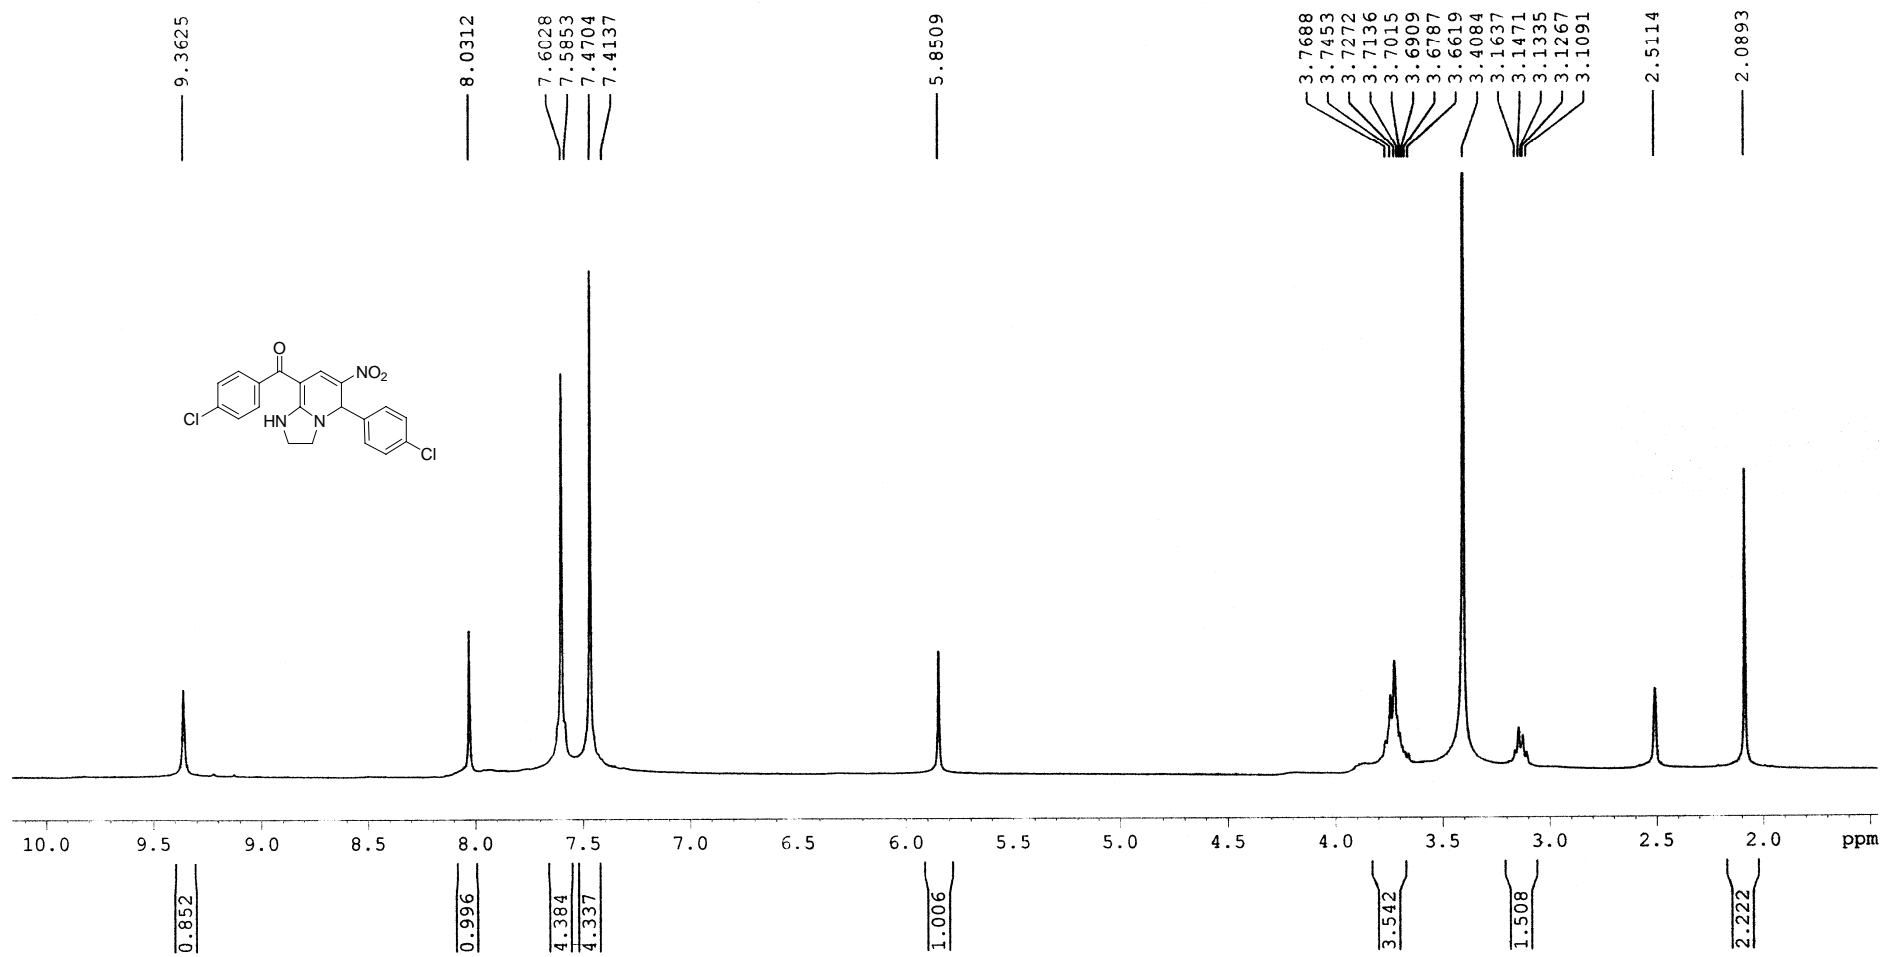

Figure 5. <sup>1</sup>H NMR (500 MHz, DMSO-*d*<sub>6</sub>) spectra of compound 4c

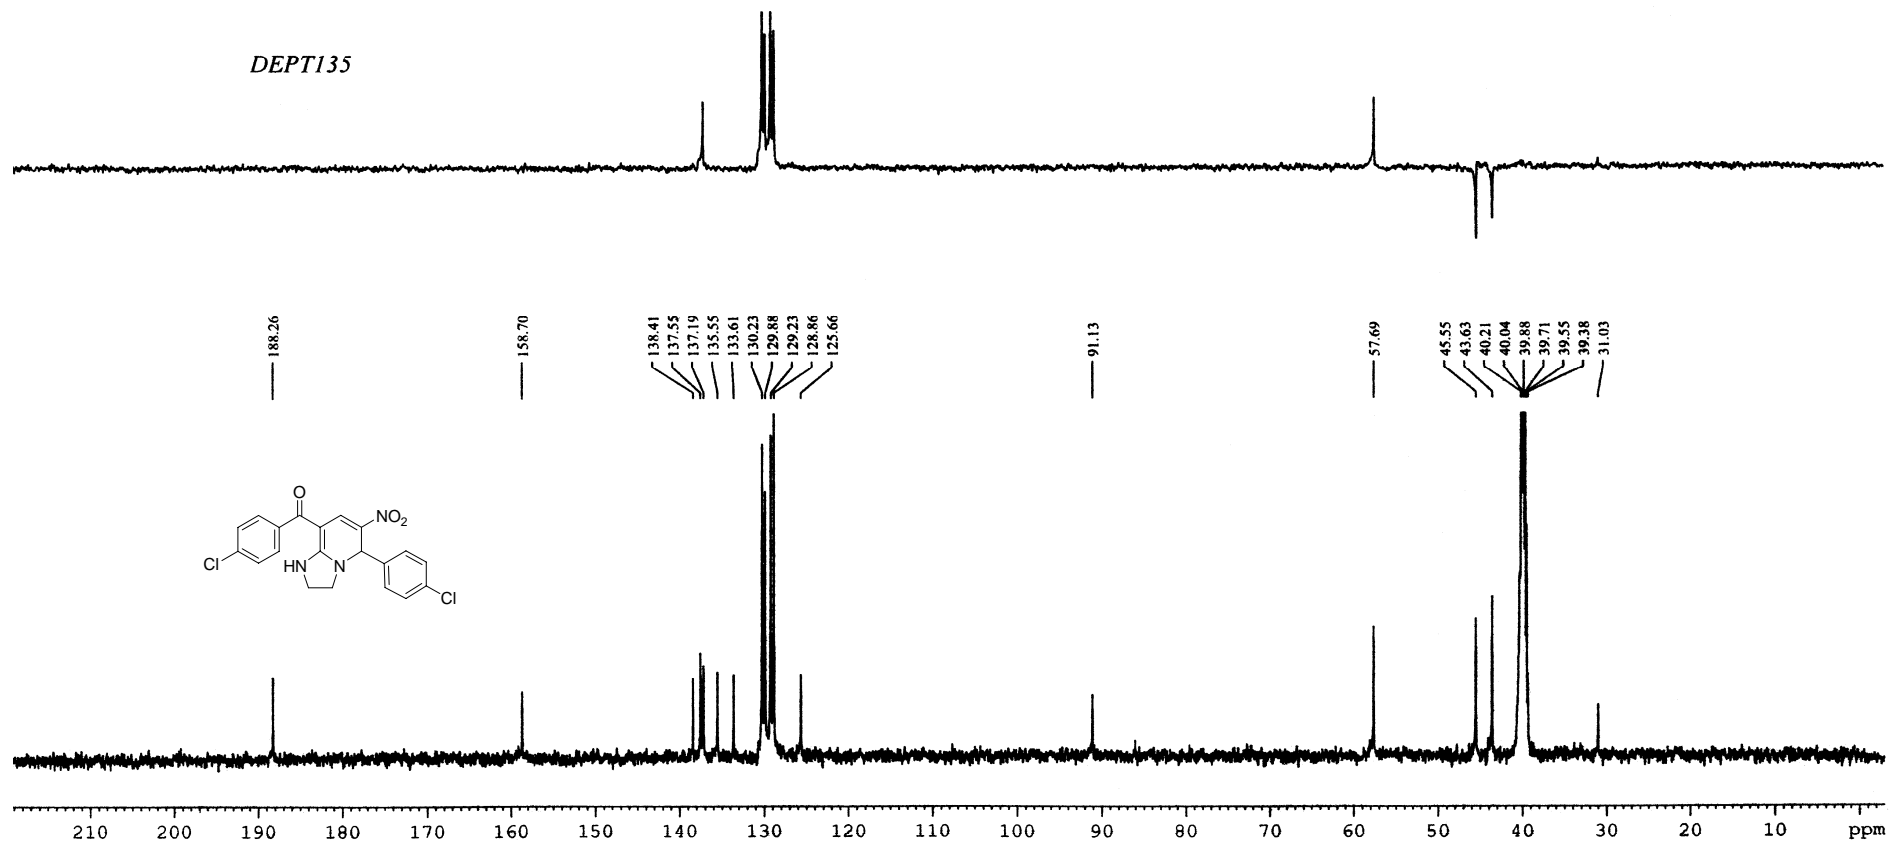

Figure 6.  $^{13}\text{C}$  NMR (125 MHz,  $\text{DMSO-}d_6$ ) spectra of compound **4c**

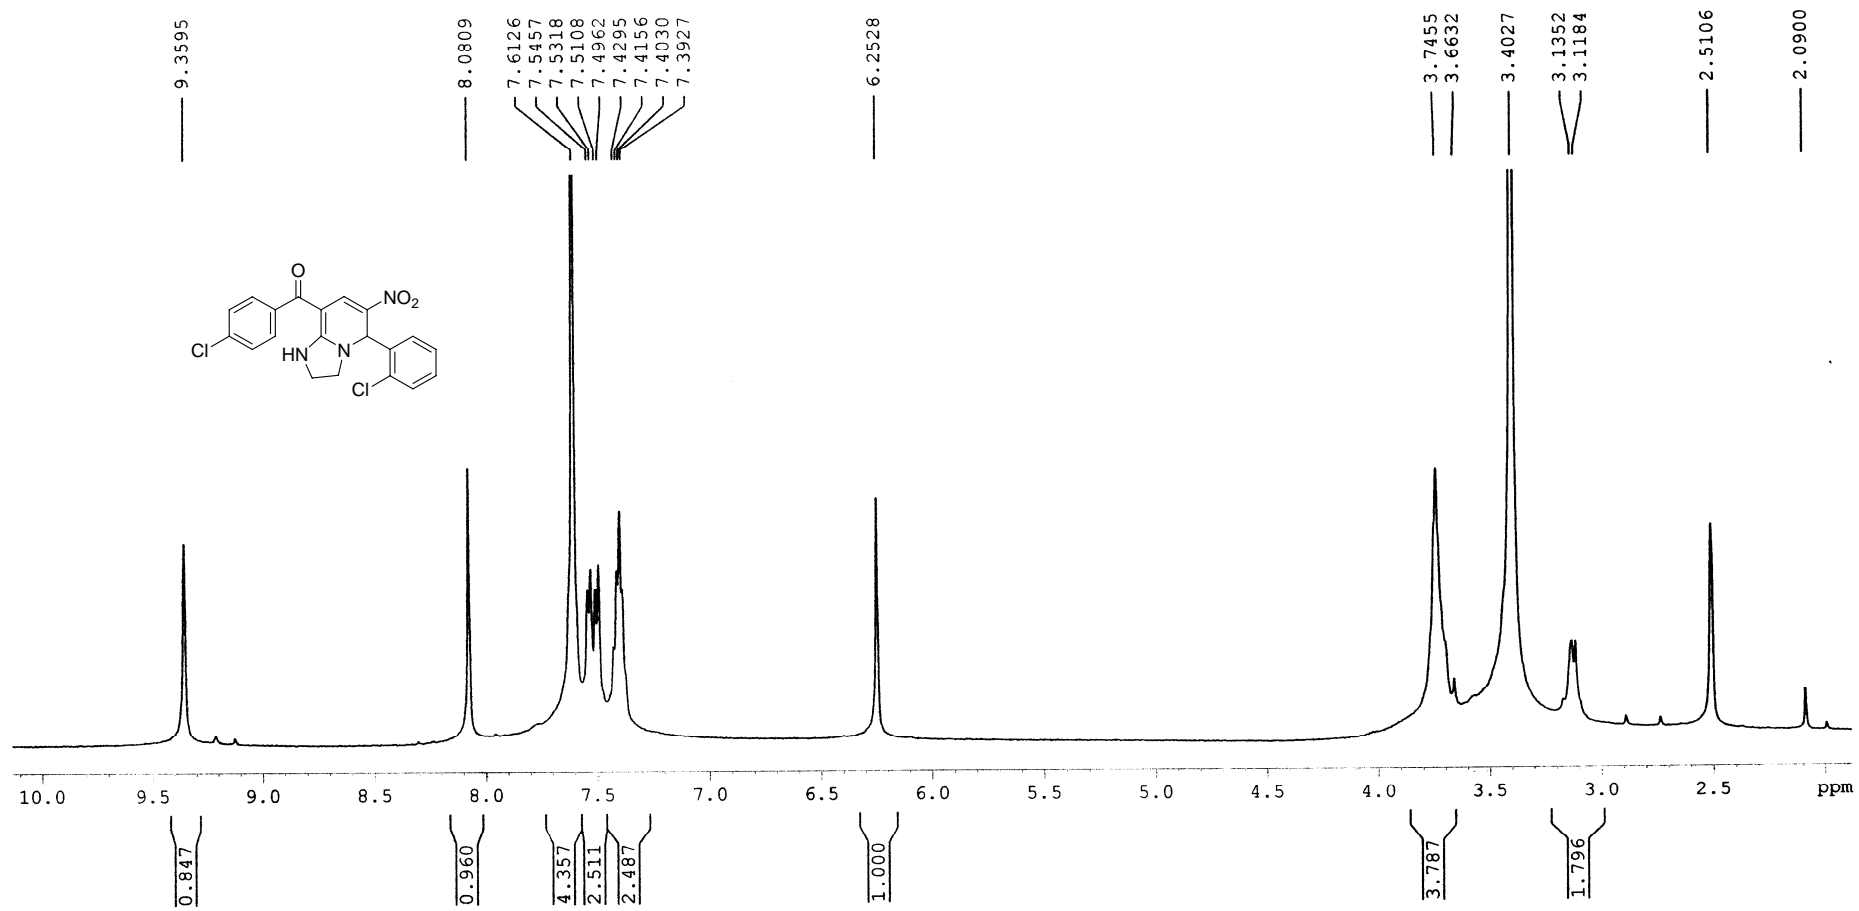

Figure 7. <sup>1</sup>H NMR (500 MHz, DMSO-*d*<sub>6</sub>) spectra of compound 4d

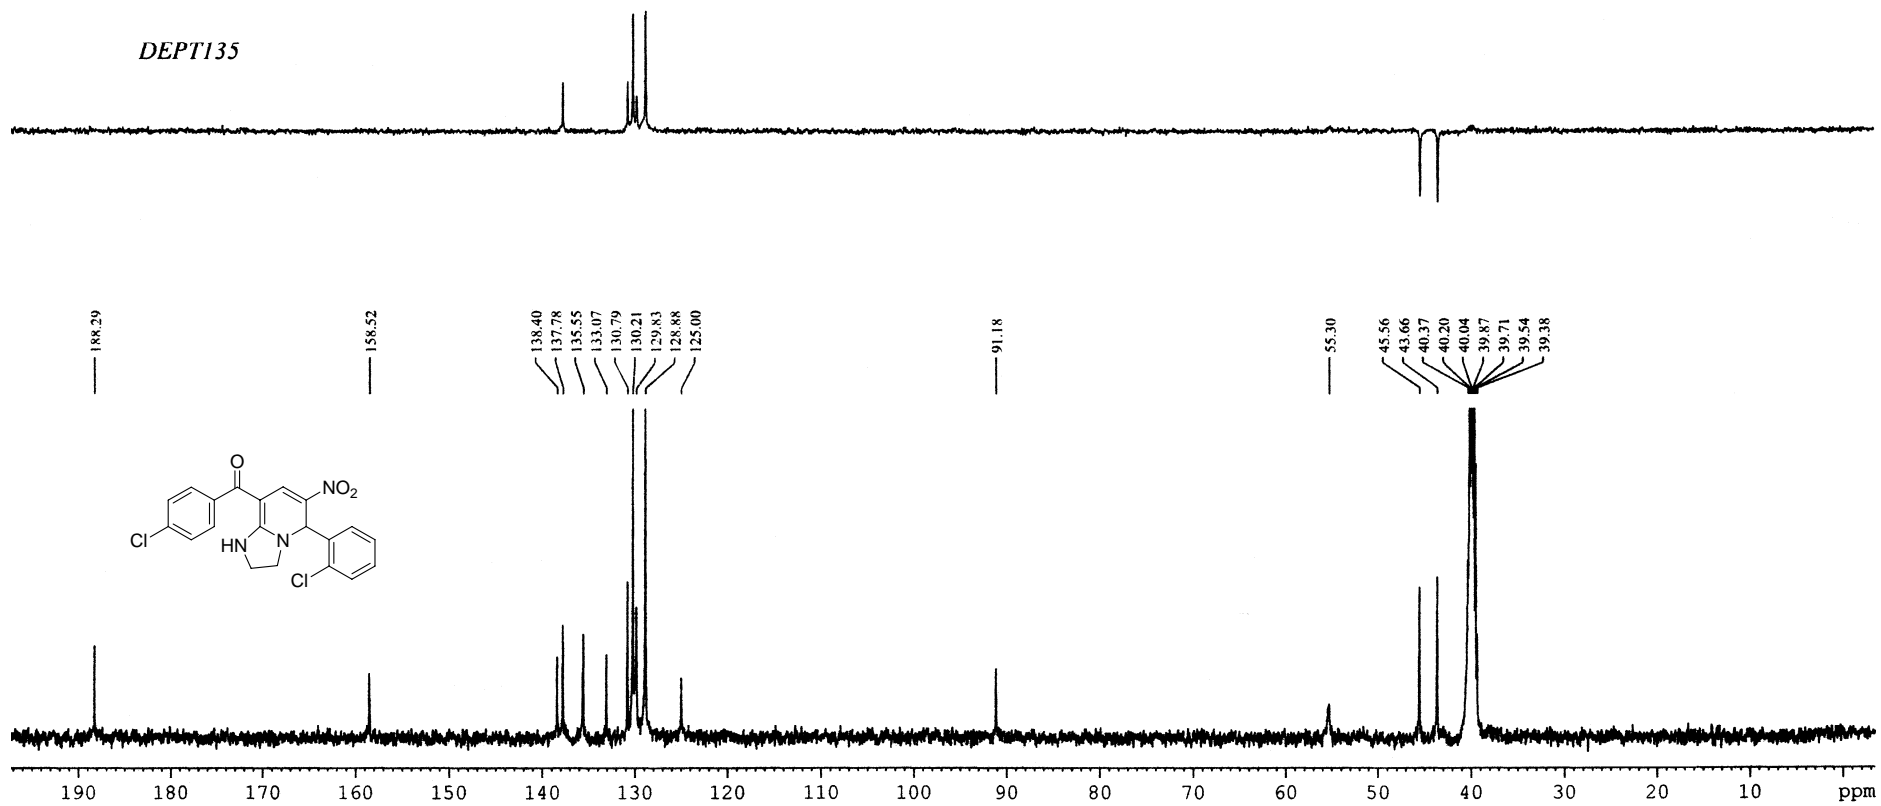

**Figure 8.**  $^{13}\text{C}$  NMR (125 MHz,  $\text{DMSO-}d_6$ ) spectra of compound **4d**

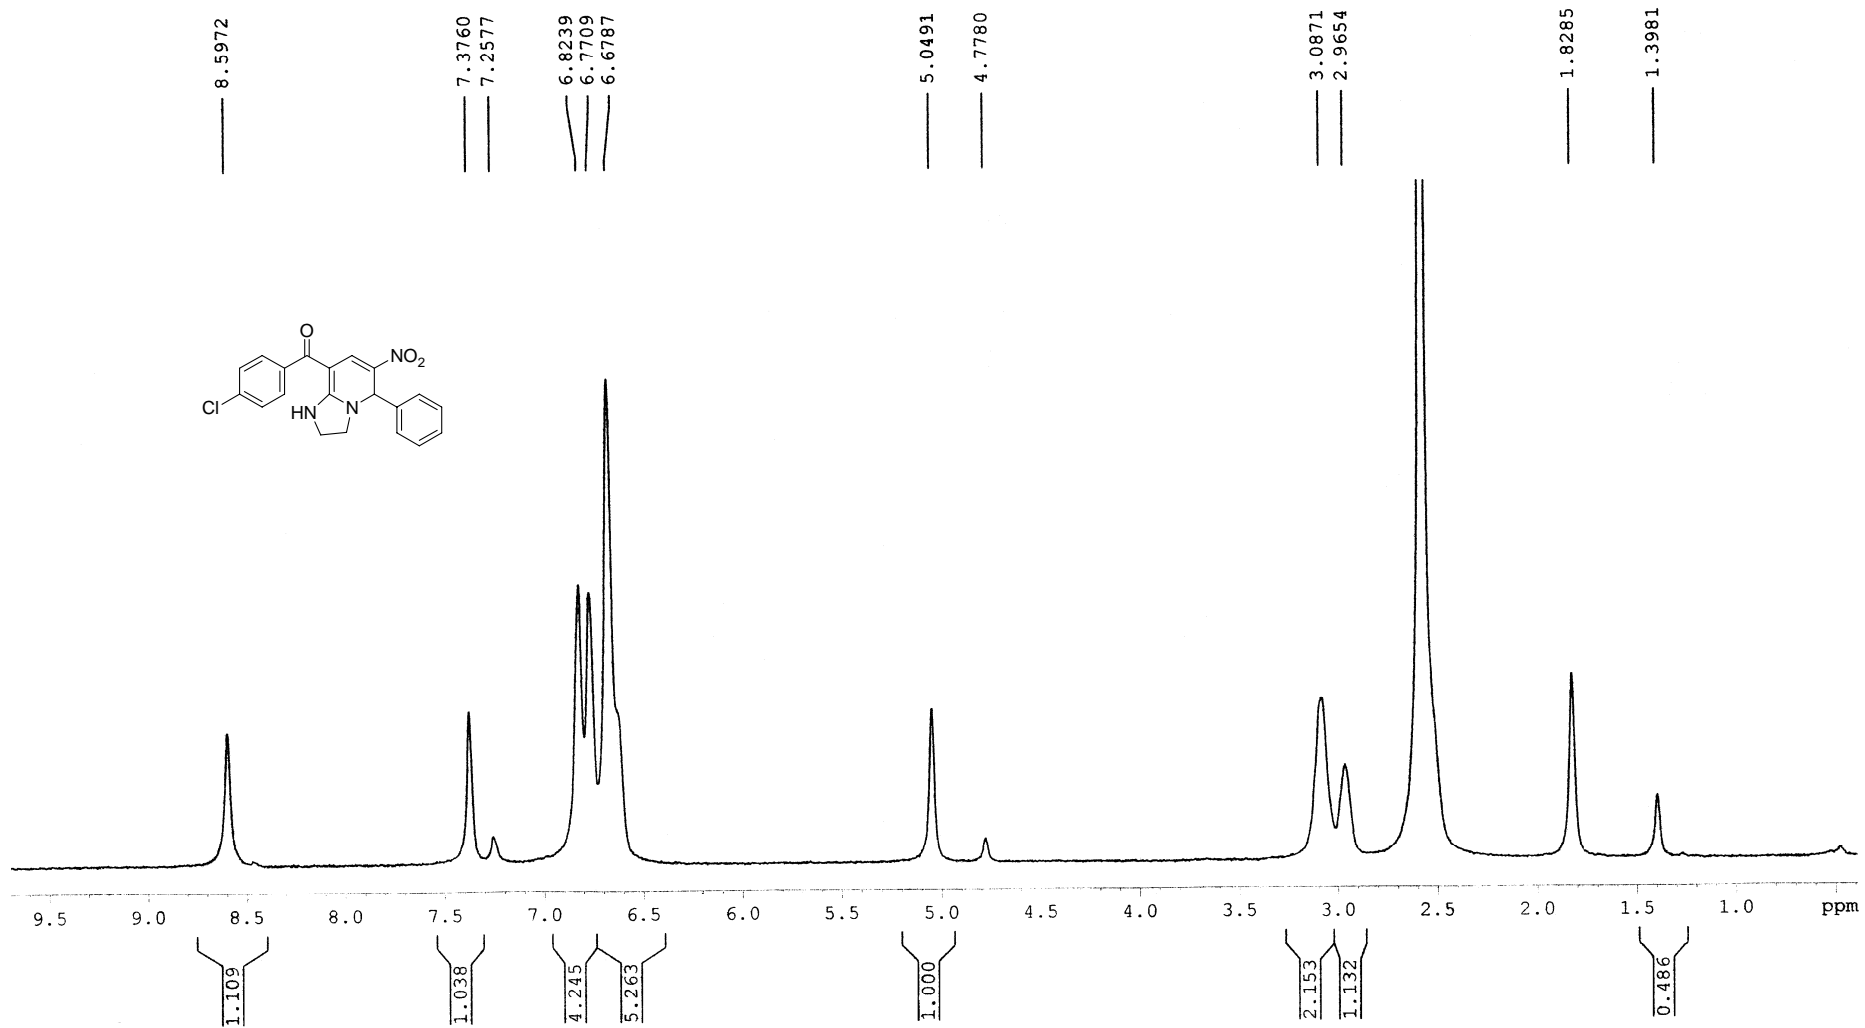

**Figure 9.** <sup>1</sup>H NMR (500 MHz, CDCl<sub>3</sub>+DMSO-*d*<sub>6</sub>) spectra of compound 4e

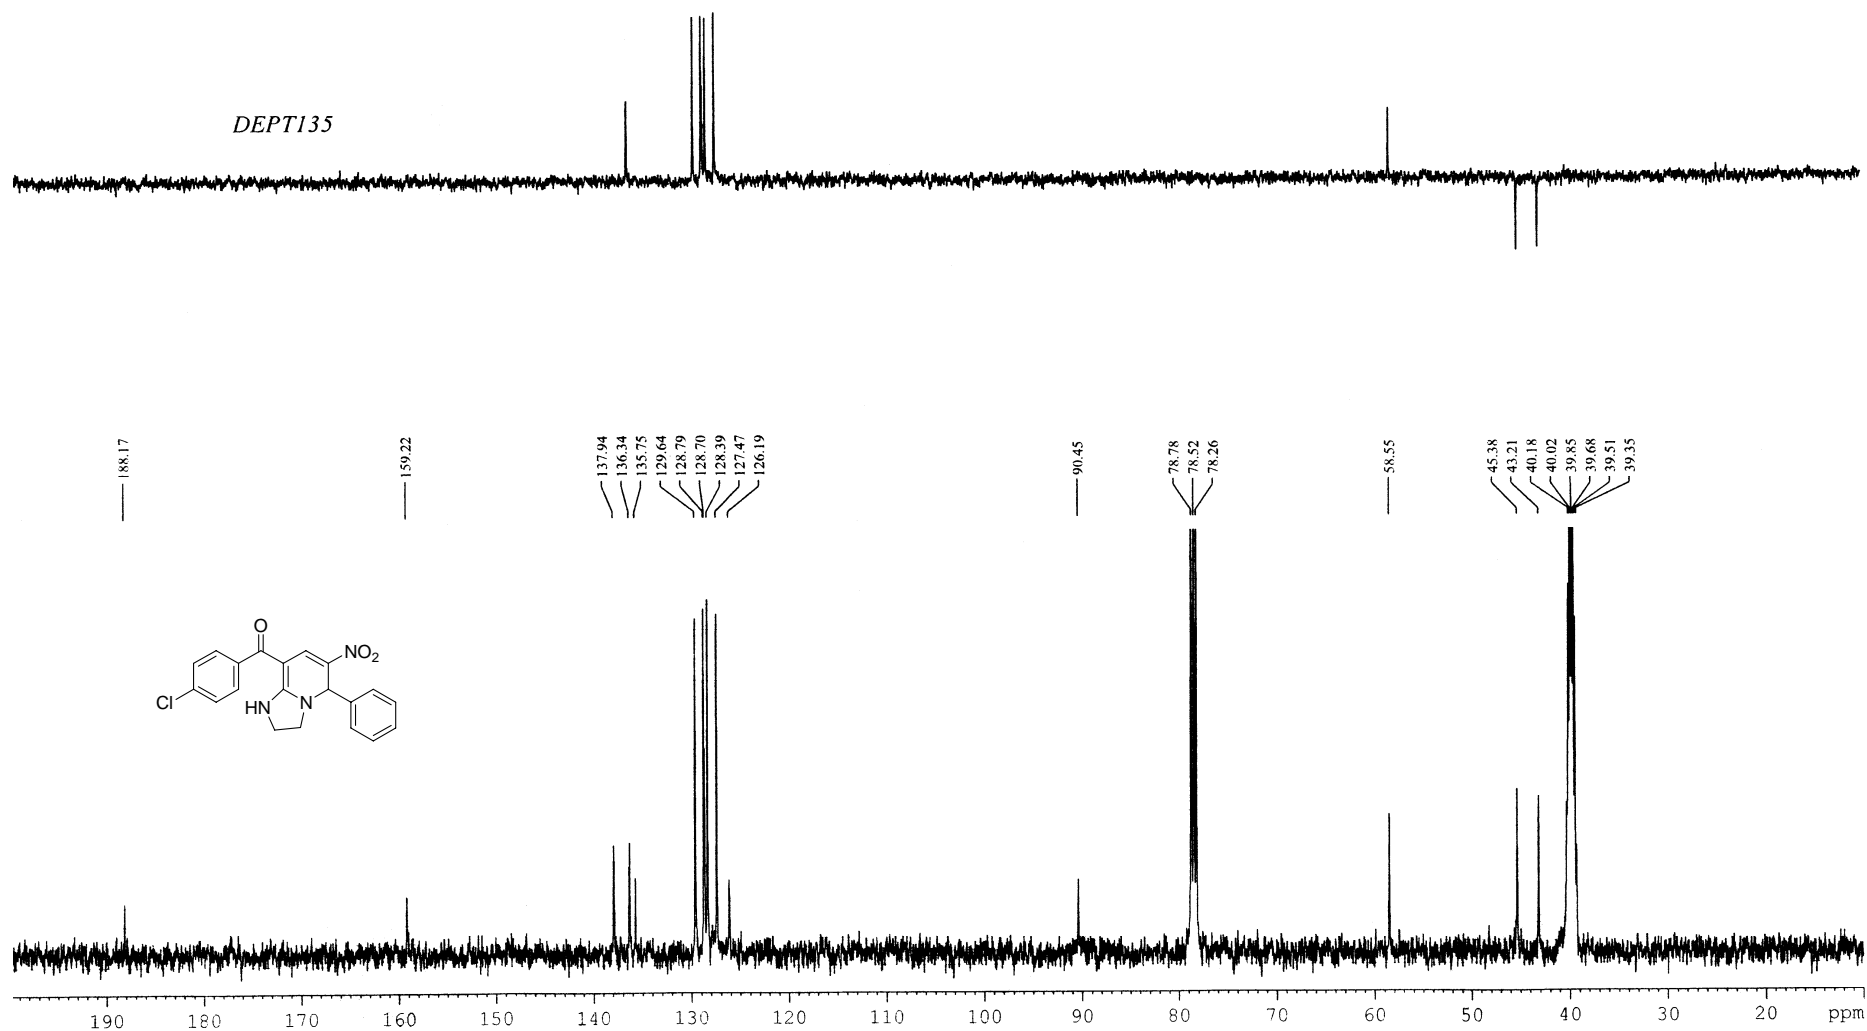

Figure 10. <sup>13</sup>C NMR (125 MHz, CDCl<sub>3</sub>+DMSO-*d*<sub>6</sub>) spectra of compound 4e



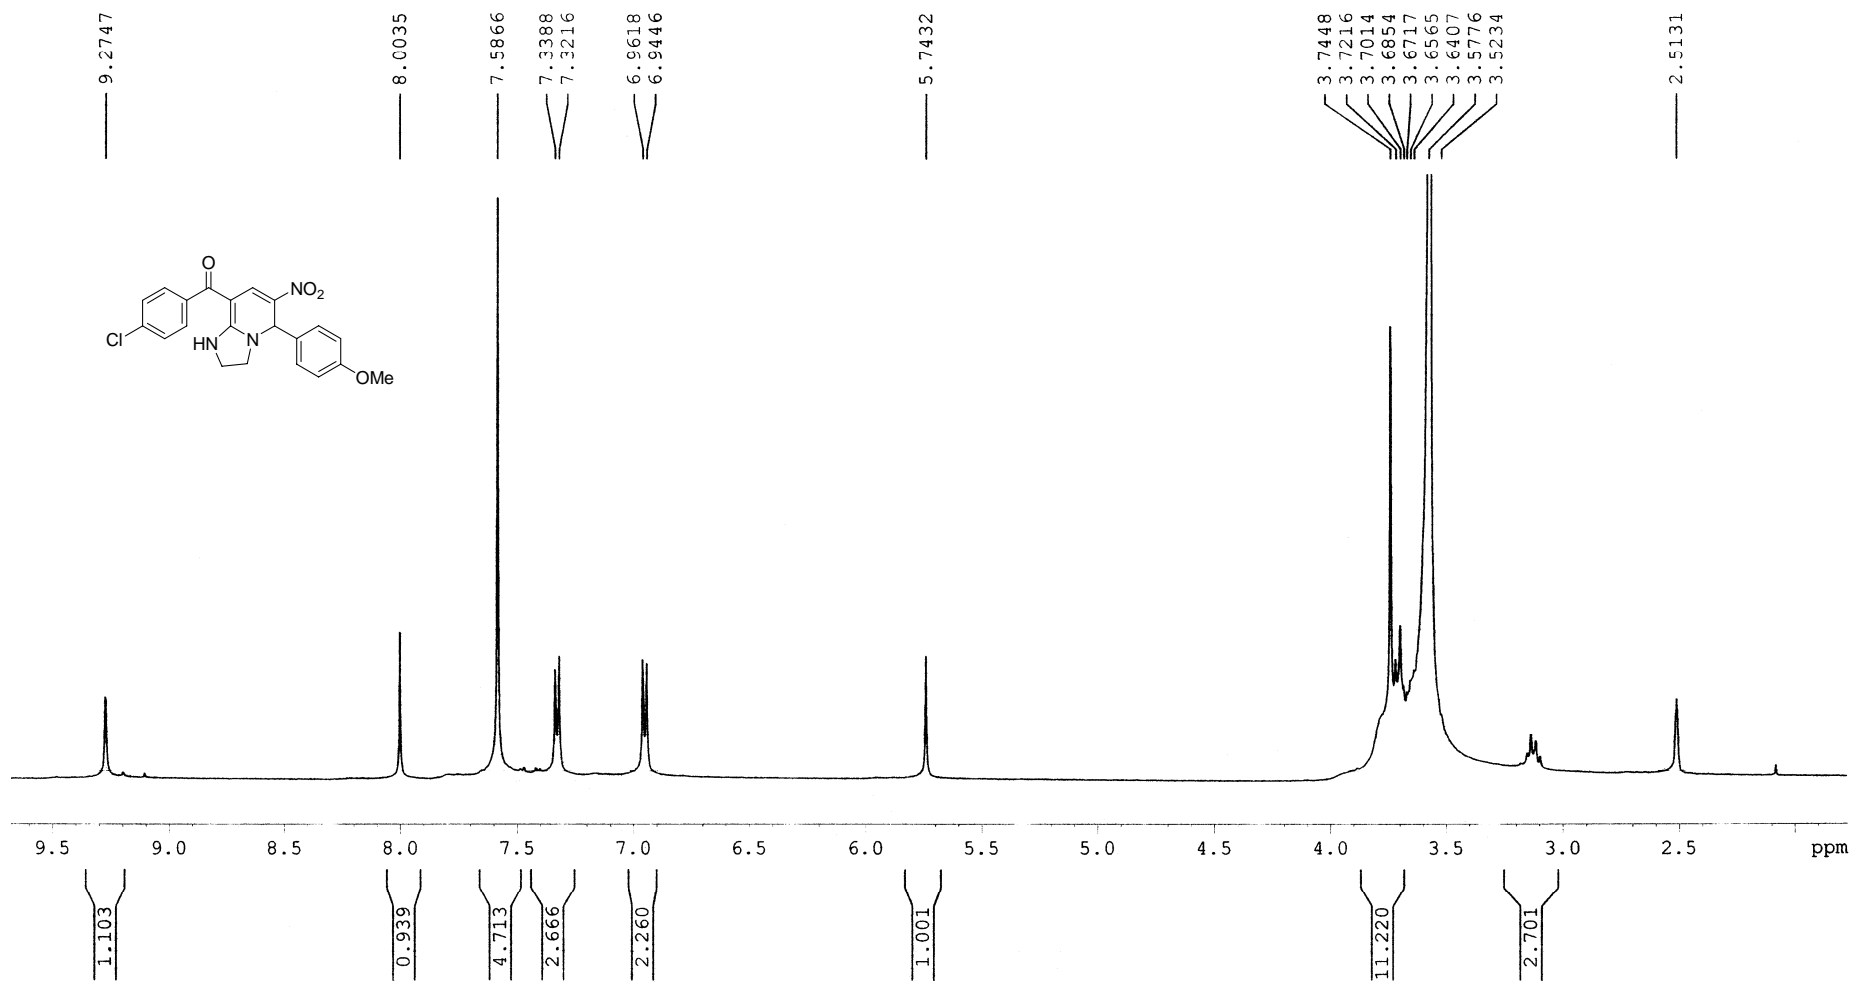

**Figure 11.**  $^1\text{H}$  NMR (500 MHz,  $\text{DMSO-}d_6$ ) spectra of compound **4f**

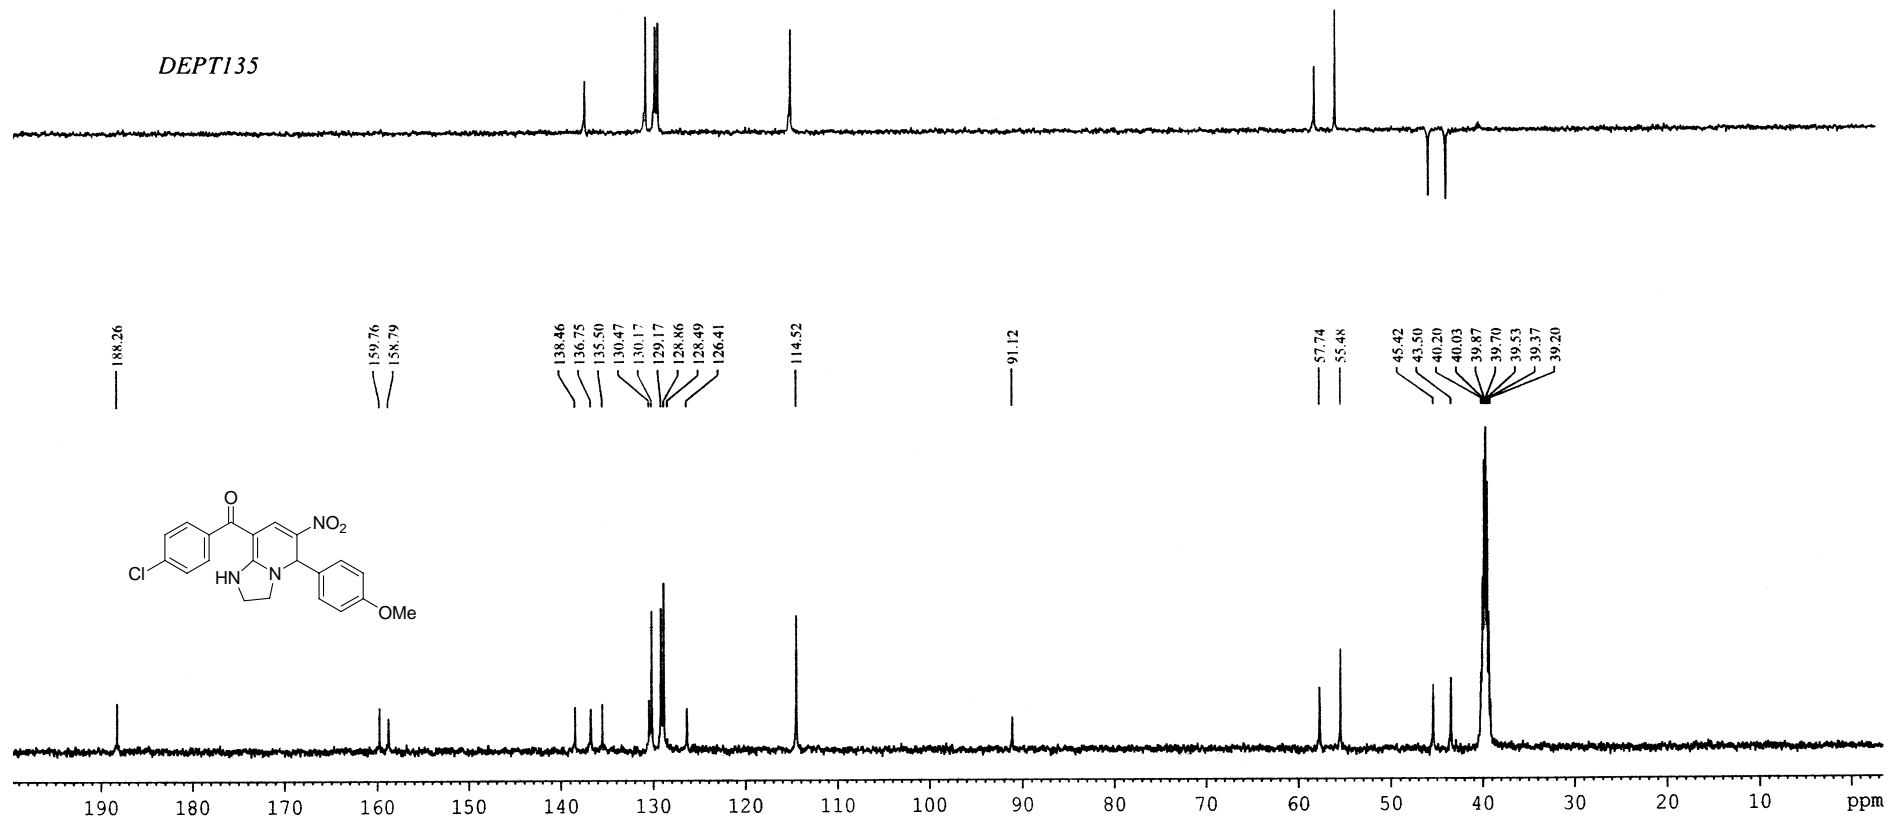

Figure 12.  $^{13}\text{C}$  NMR (125 MHz,  $\text{DMSO}-d_6$ ) spectra of compound 4f

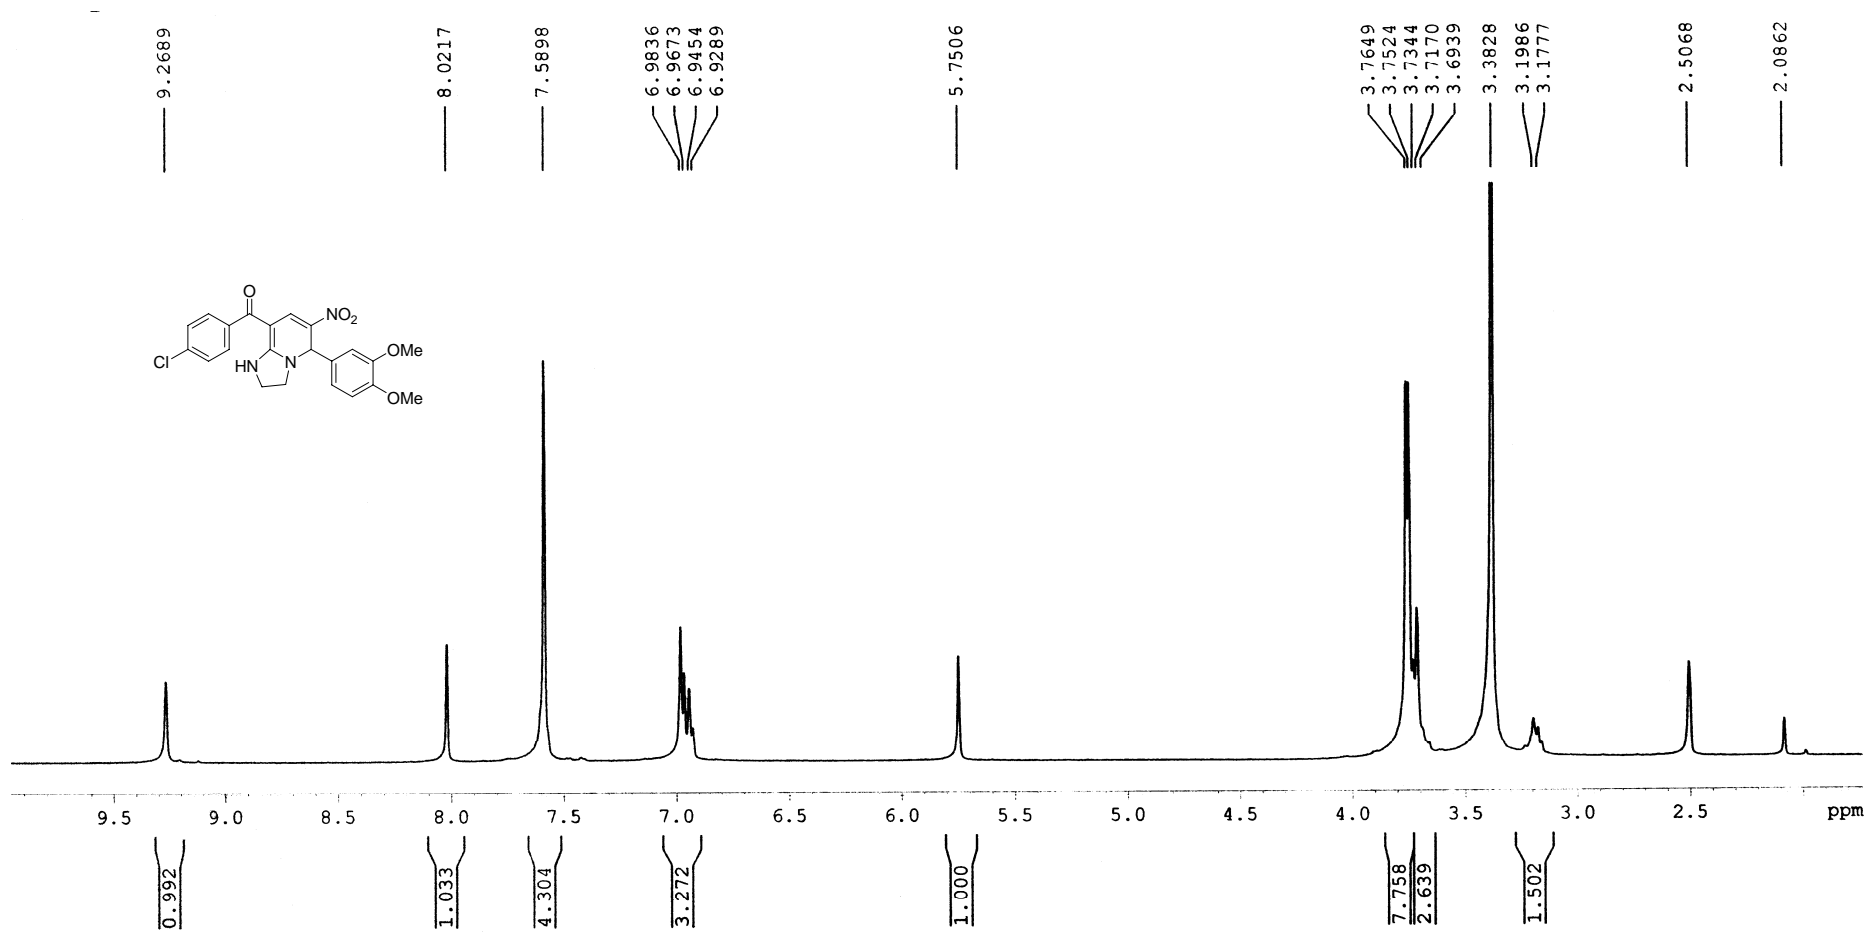

**Figure 13.** <sup>1</sup>H NMR (500 MHz, DMSO-*d*<sub>6</sub>) spectra of compound **4g**

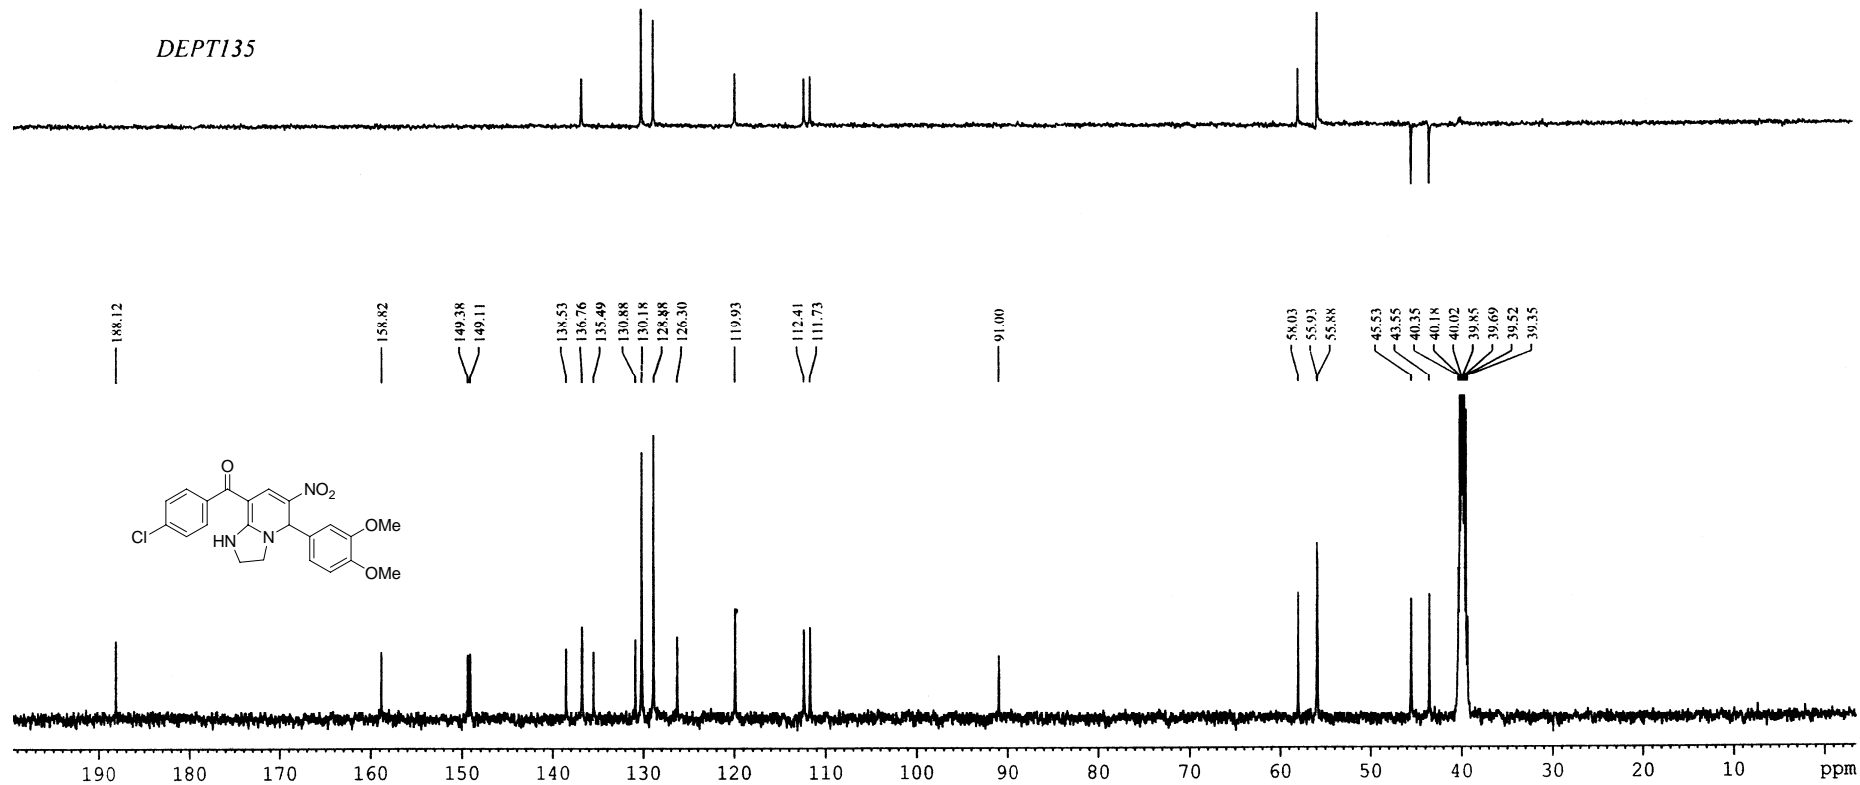

Figure 14.  $^{13}\text{C}$  NMR (125 MHz,  $\text{DMSO-}d_6$ ) spectra of compound 4g

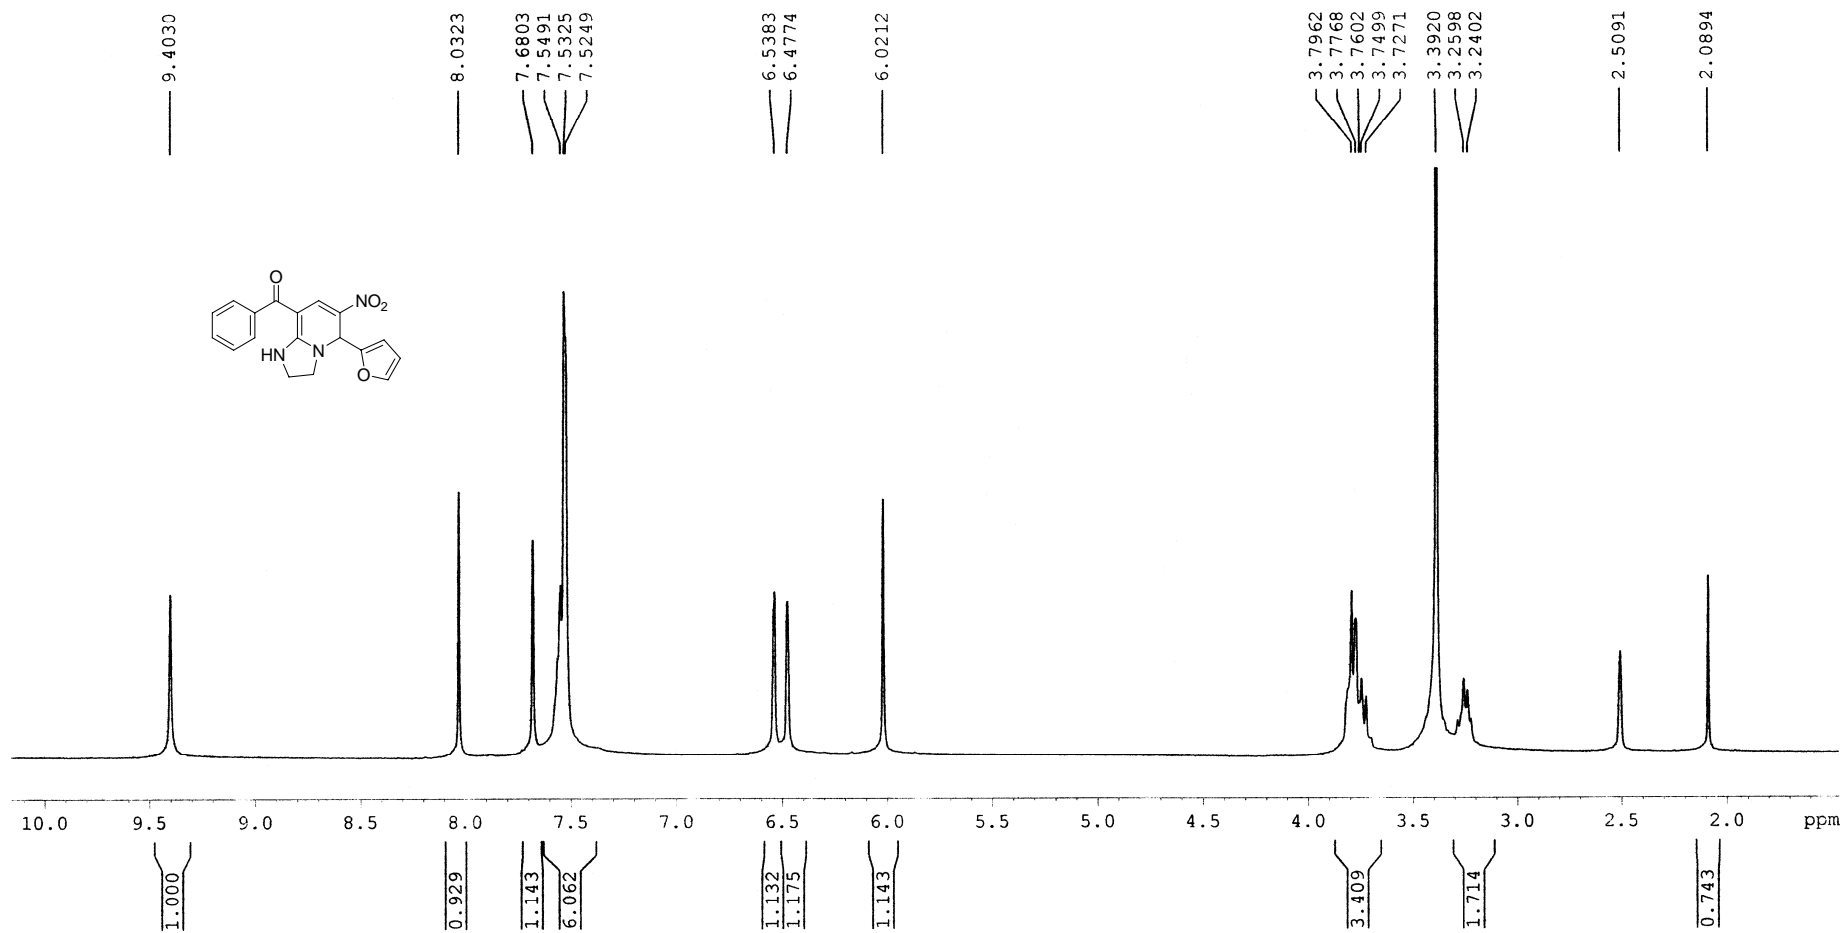

Figure 15. <sup>1</sup>H NMR (500 MHz, DMSO-*d*<sub>6</sub>) spectra of compound 4h

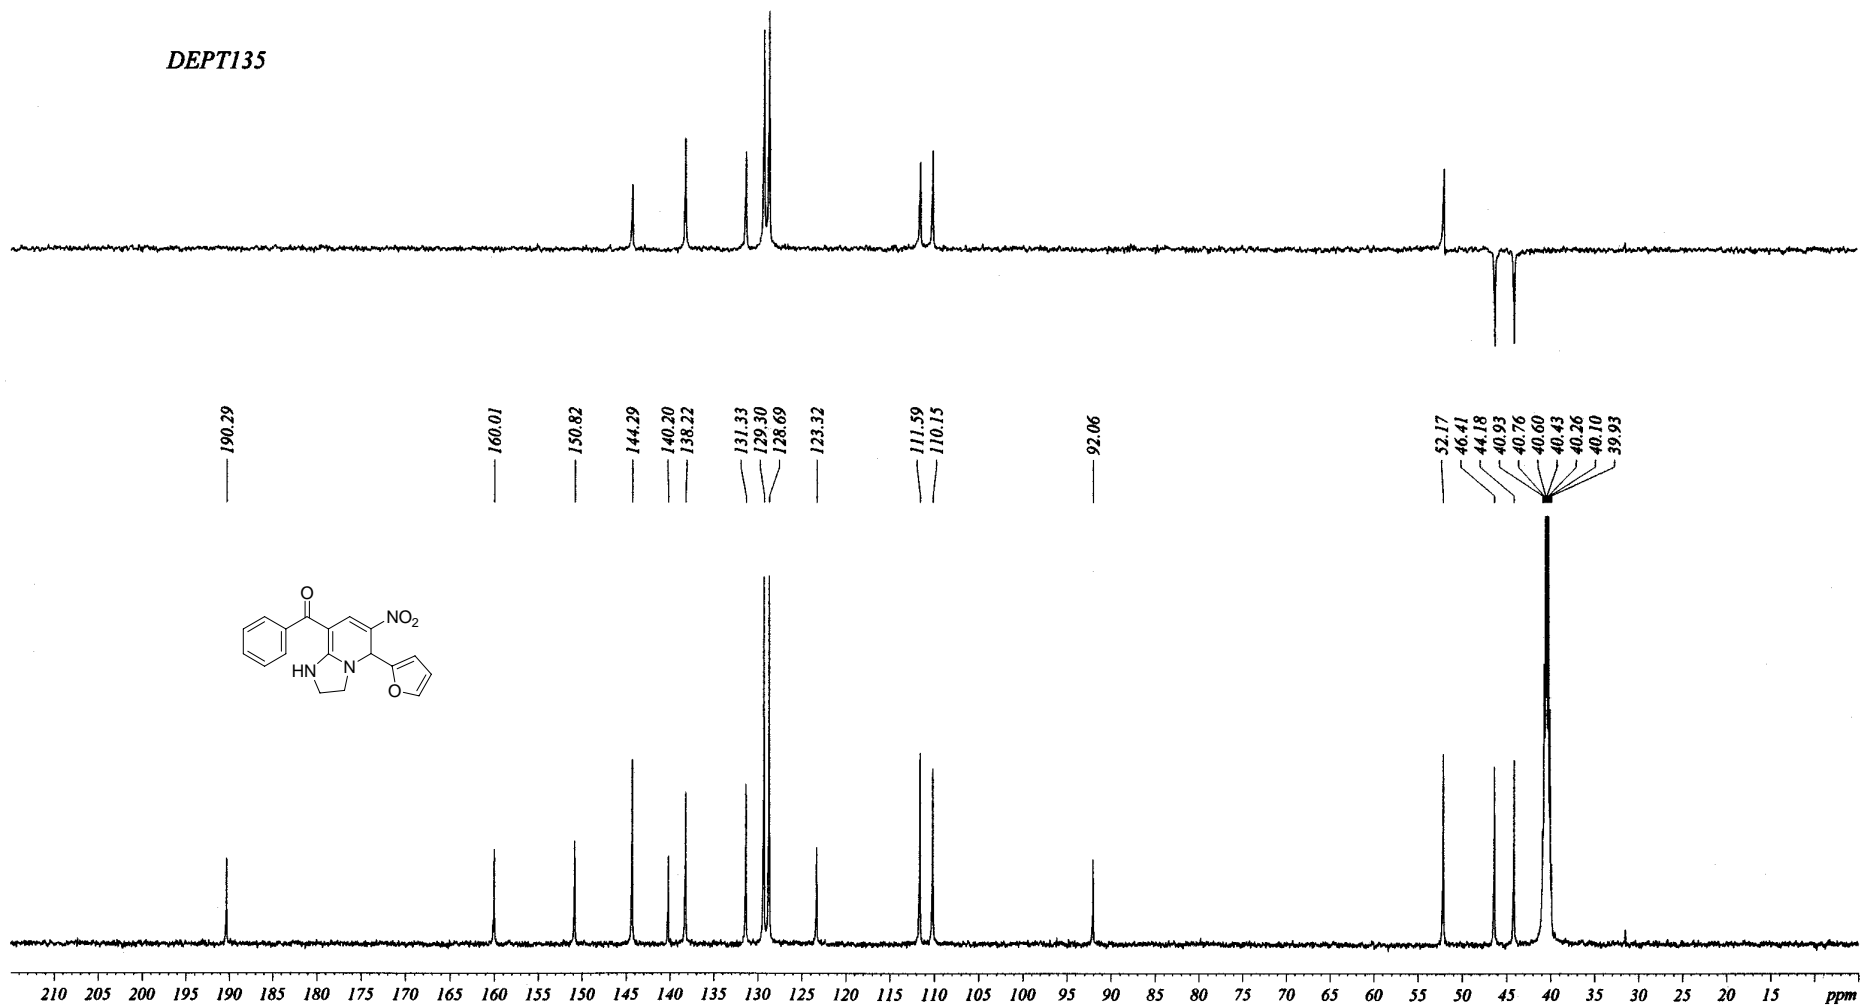

**Figure 16.**  $^{13}\text{C}$  NMR (125 MHz,  $\text{DMSO-}d_6$ ) spectra of compound **4h**

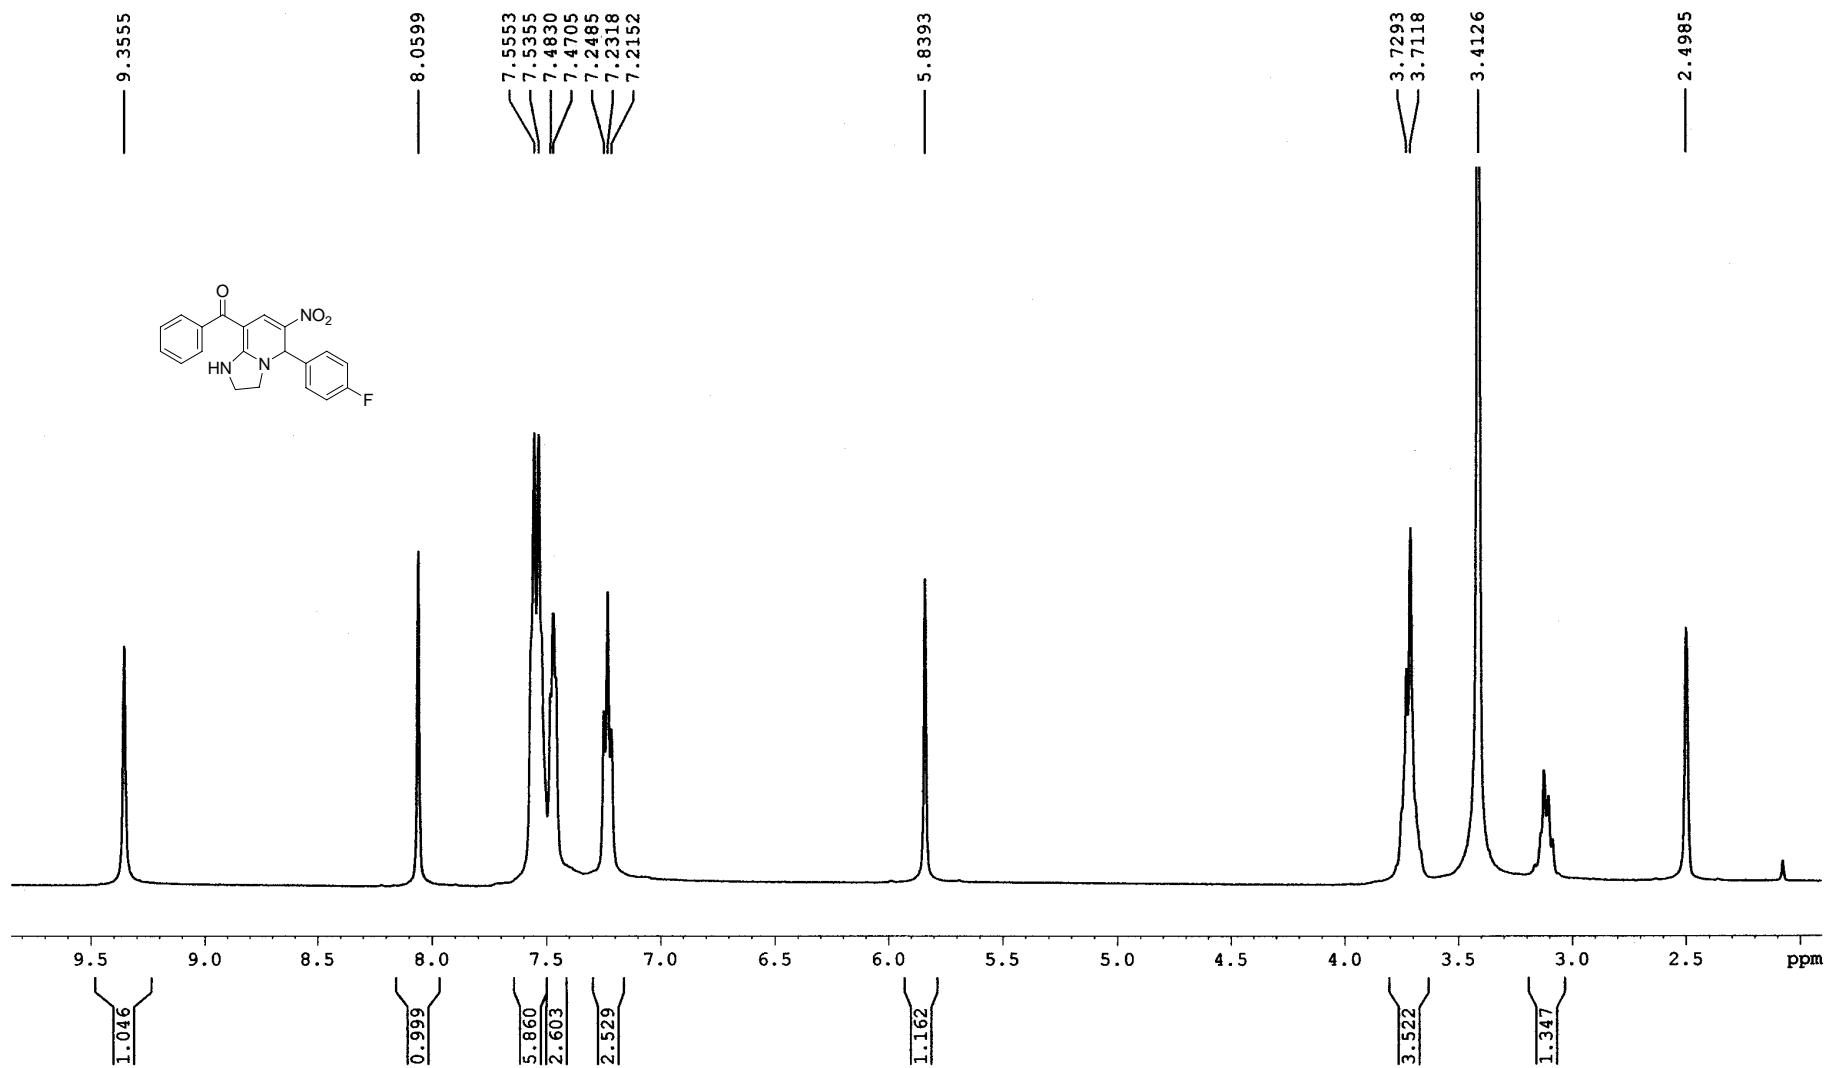

**Figure 17.** <sup>1</sup>H NMR (500 MHz, DMSO-*d*<sub>6</sub>) spectra of compound **4i**

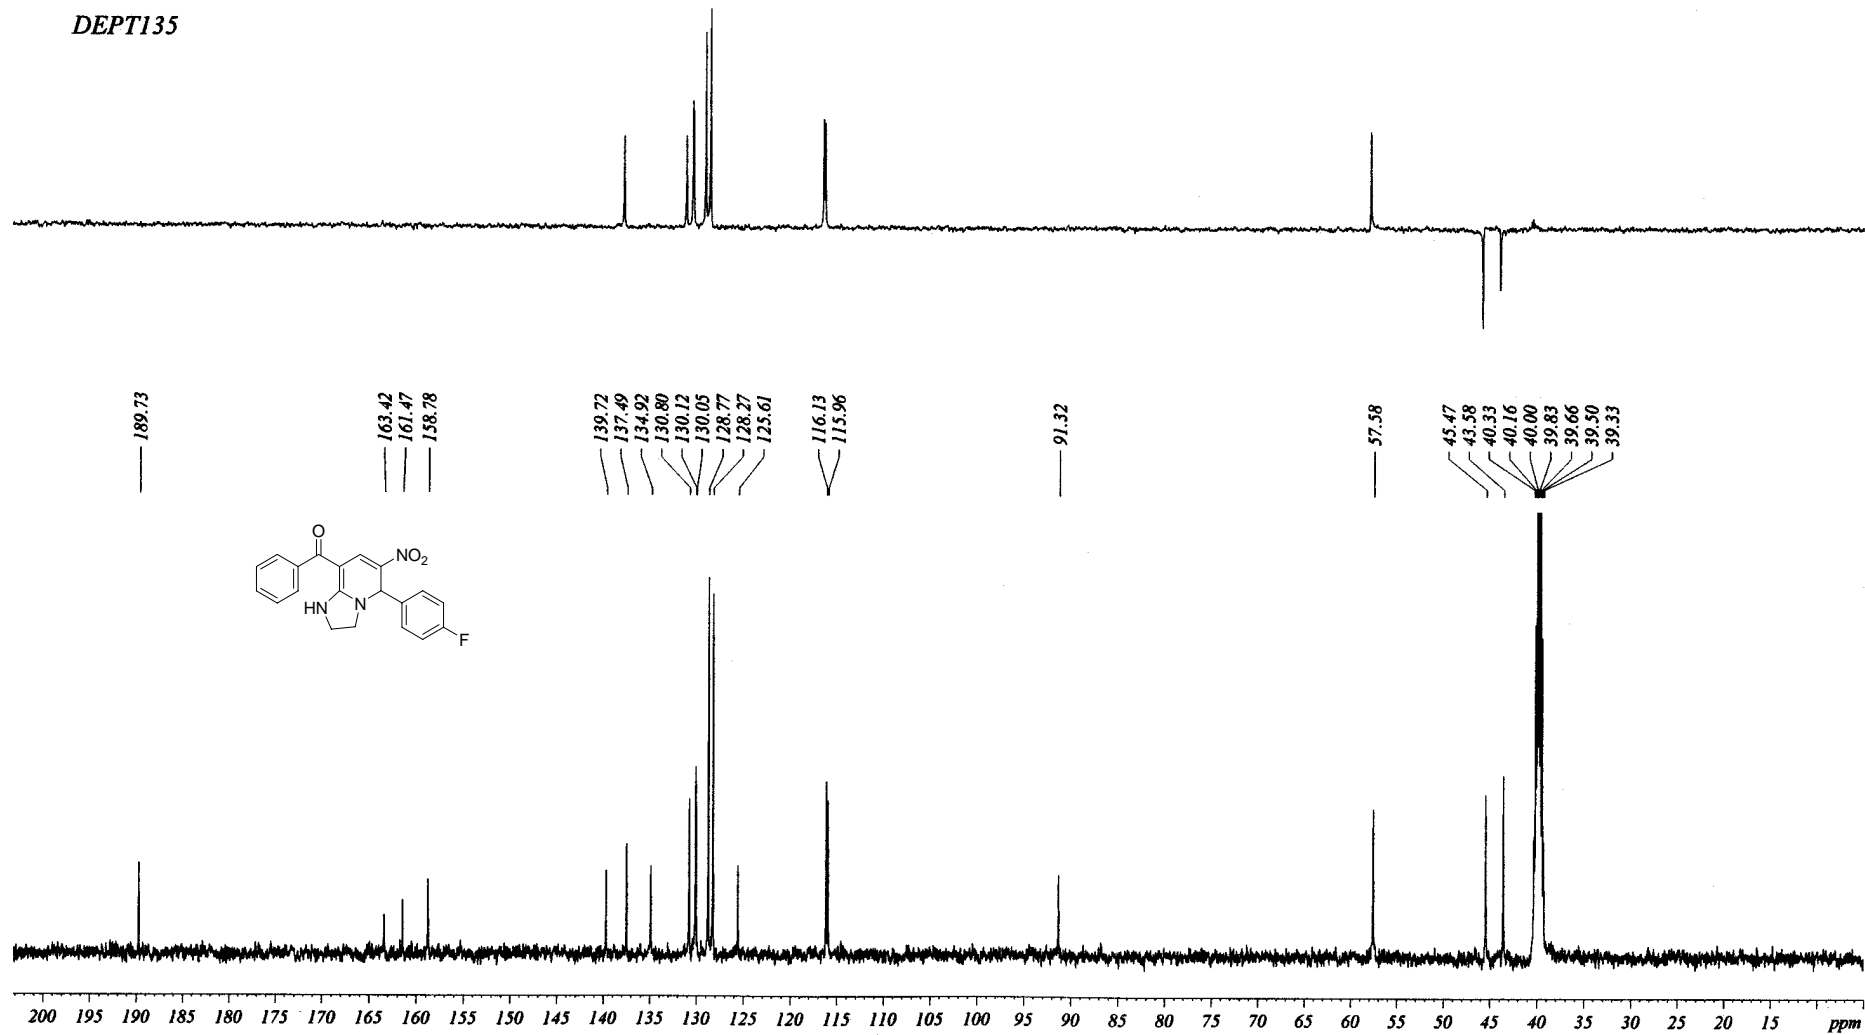

Figure 18.  $^{13}\text{C}$  NMR (125 MHz,  $\text{DMSO-}d_6$ ) spectra of compound **4i**



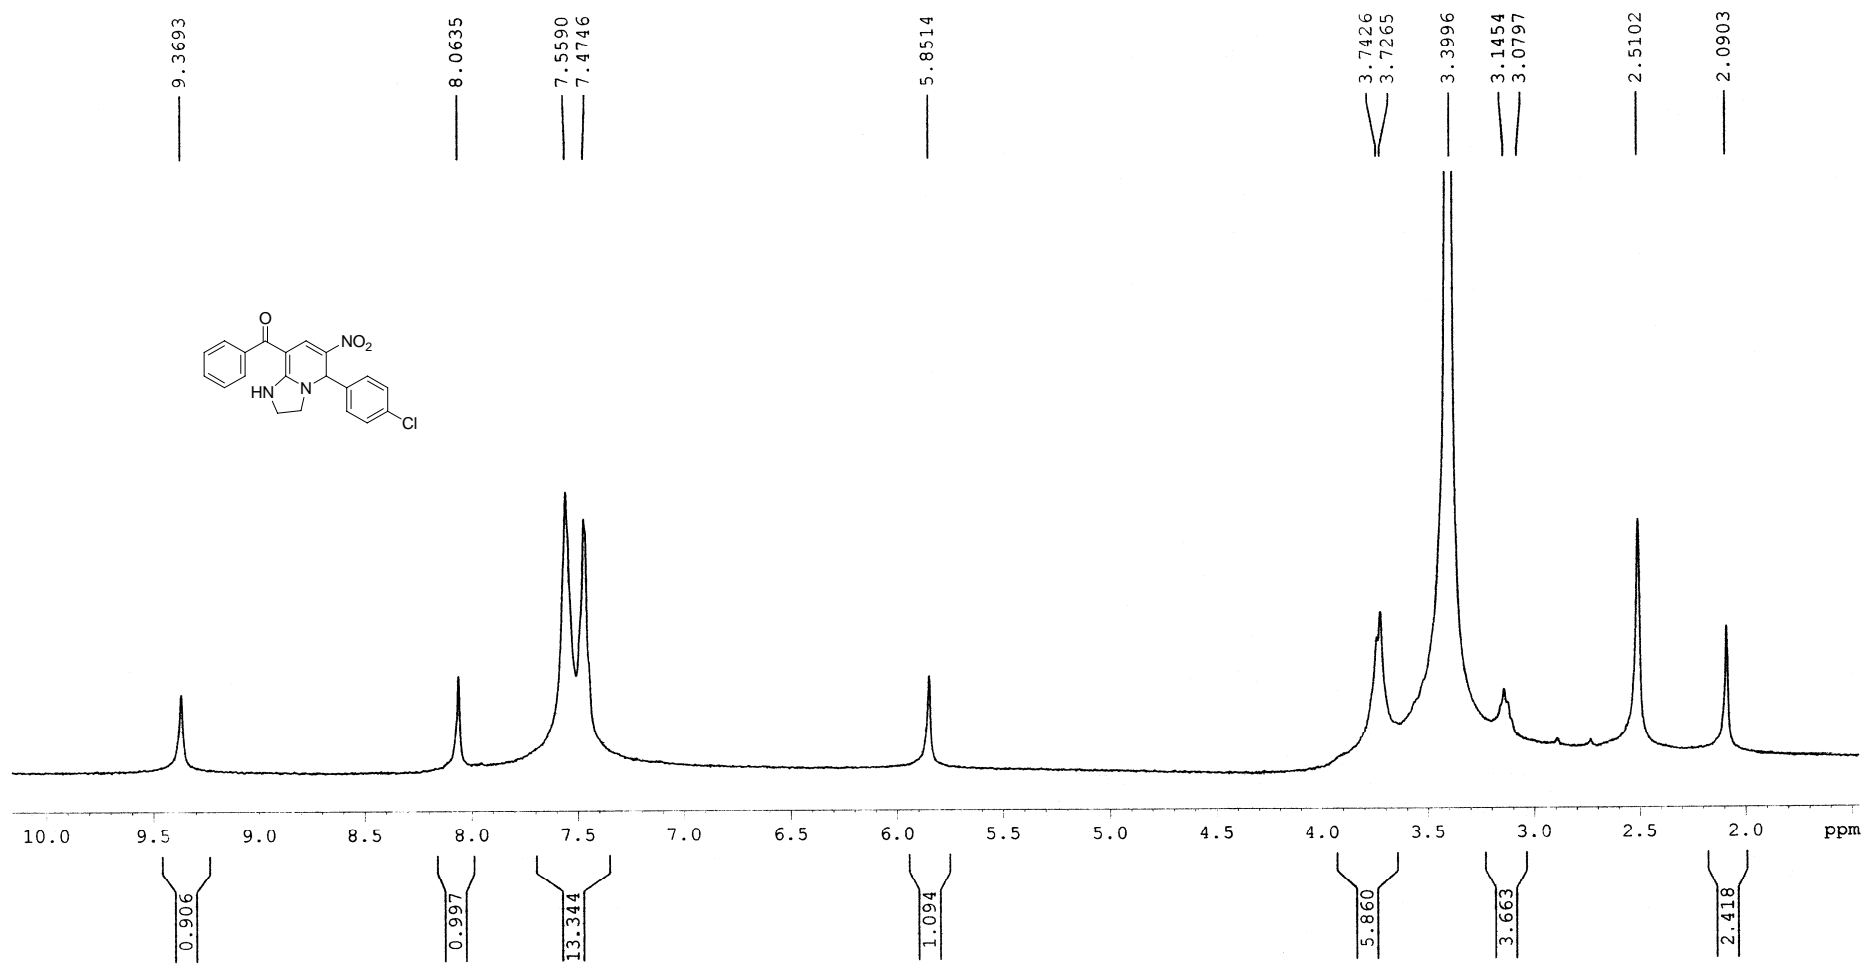

**Figure 19.** <sup>1</sup>H NMR (500 MHz, DMSO-*d*<sub>6</sub>) spectra of compound **4j**

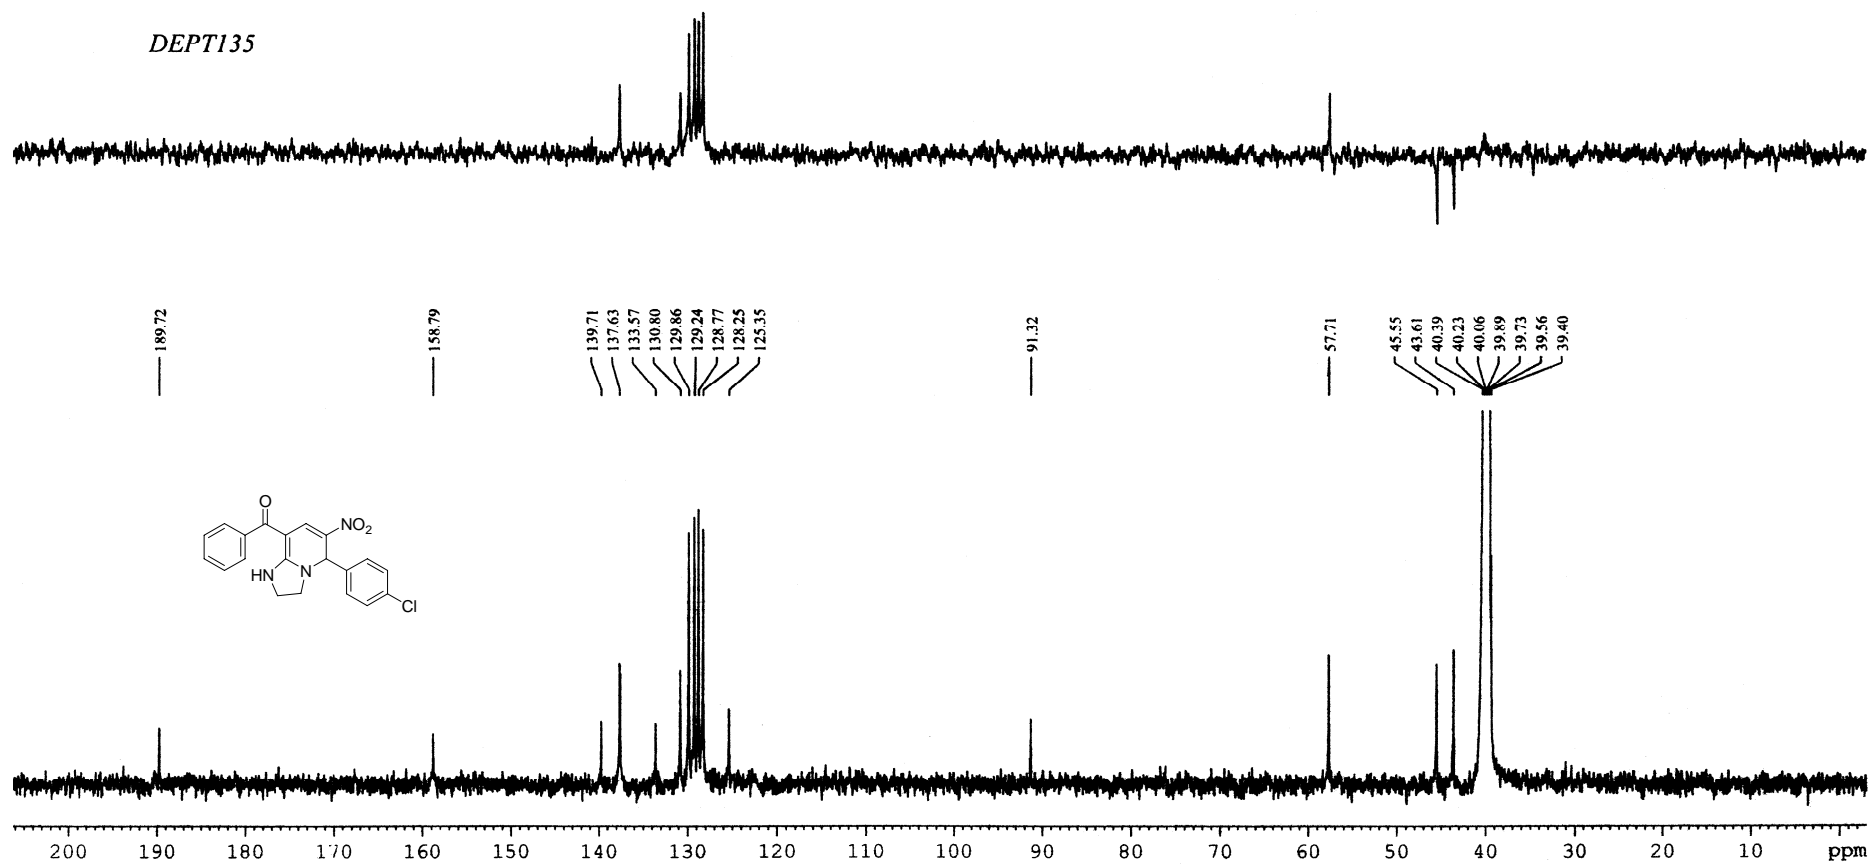

Figure 20.  $^{13}\text{C}$  NMR (125 MHz,  $\text{DMSO-}d_6$ ) spectra of compound 4j

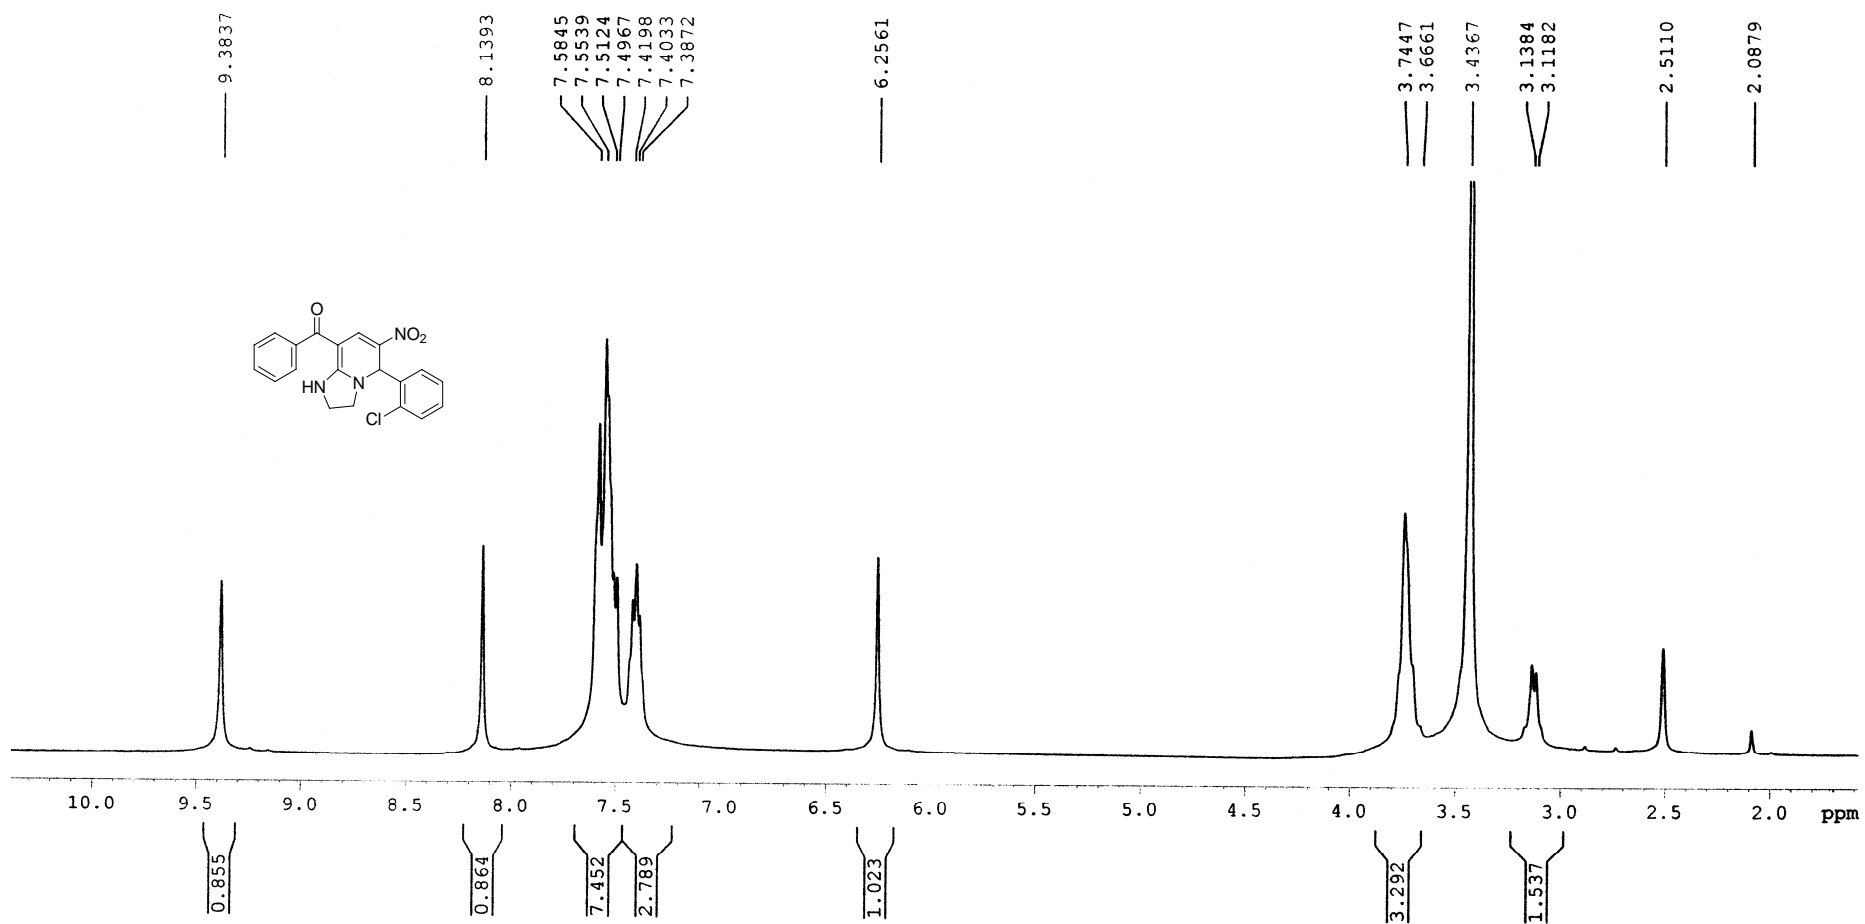

**Figure 21.** <sup>1</sup>H NMR (500 MHz, DMSO-*d*<sub>6</sub>) spectra of compound **4k**

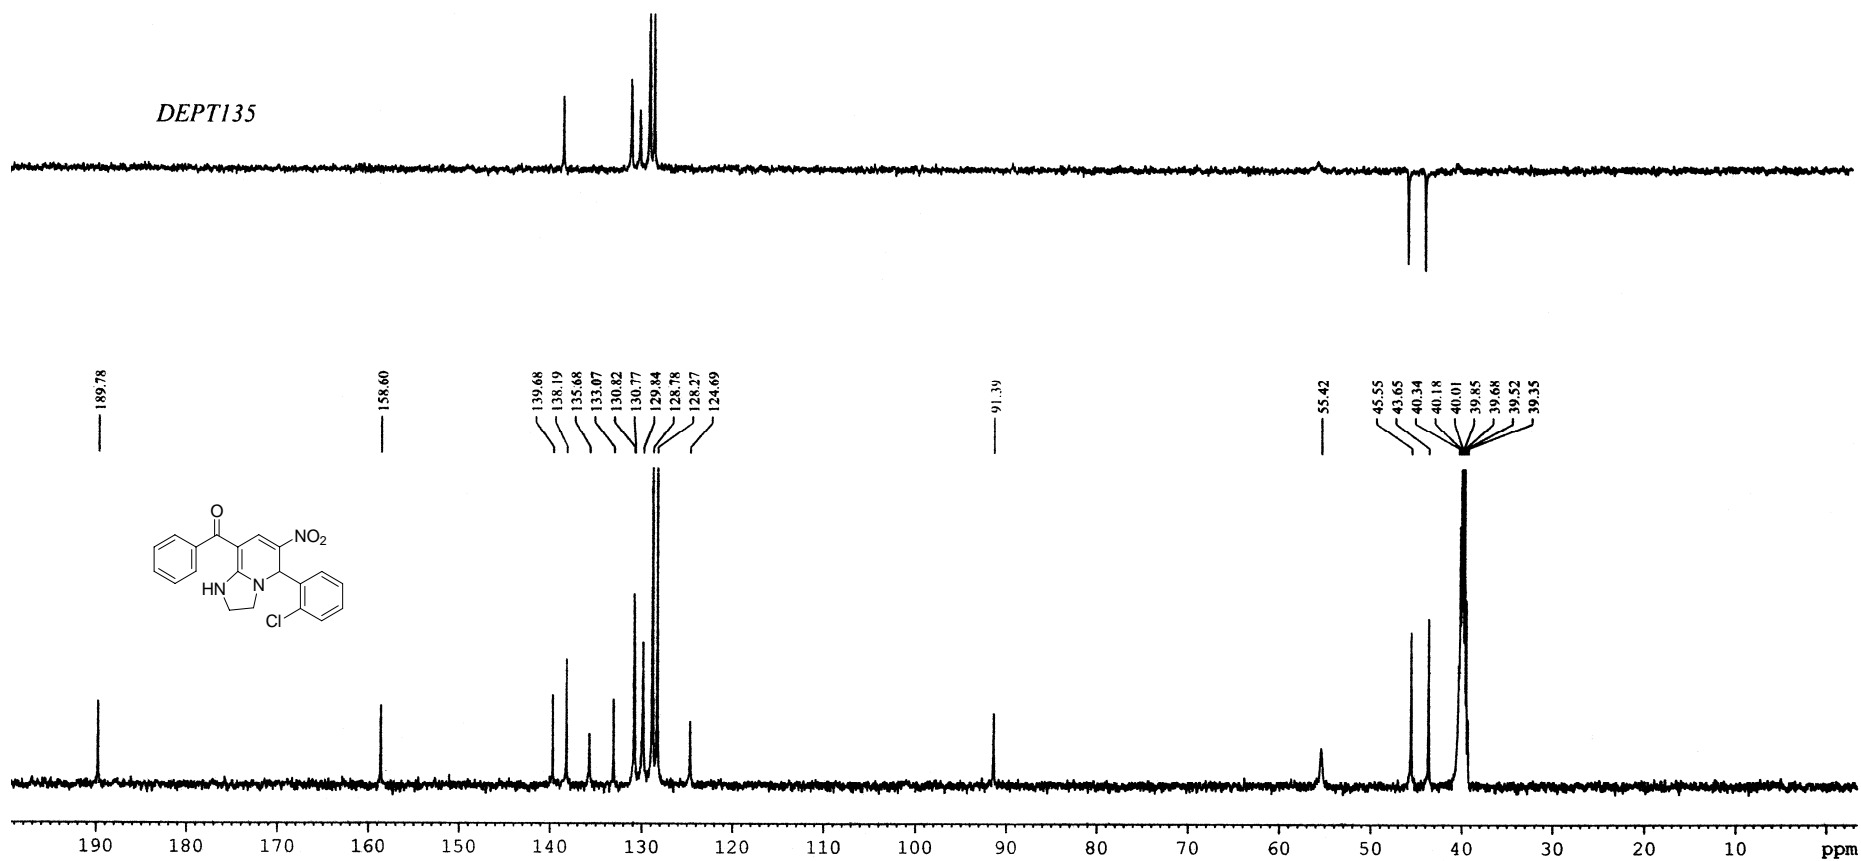

Figure 22.  $^{13}\text{C}$  NMR (125 MHz,  $\text{DMSO-}d_6$ ) spectra of compound 4k

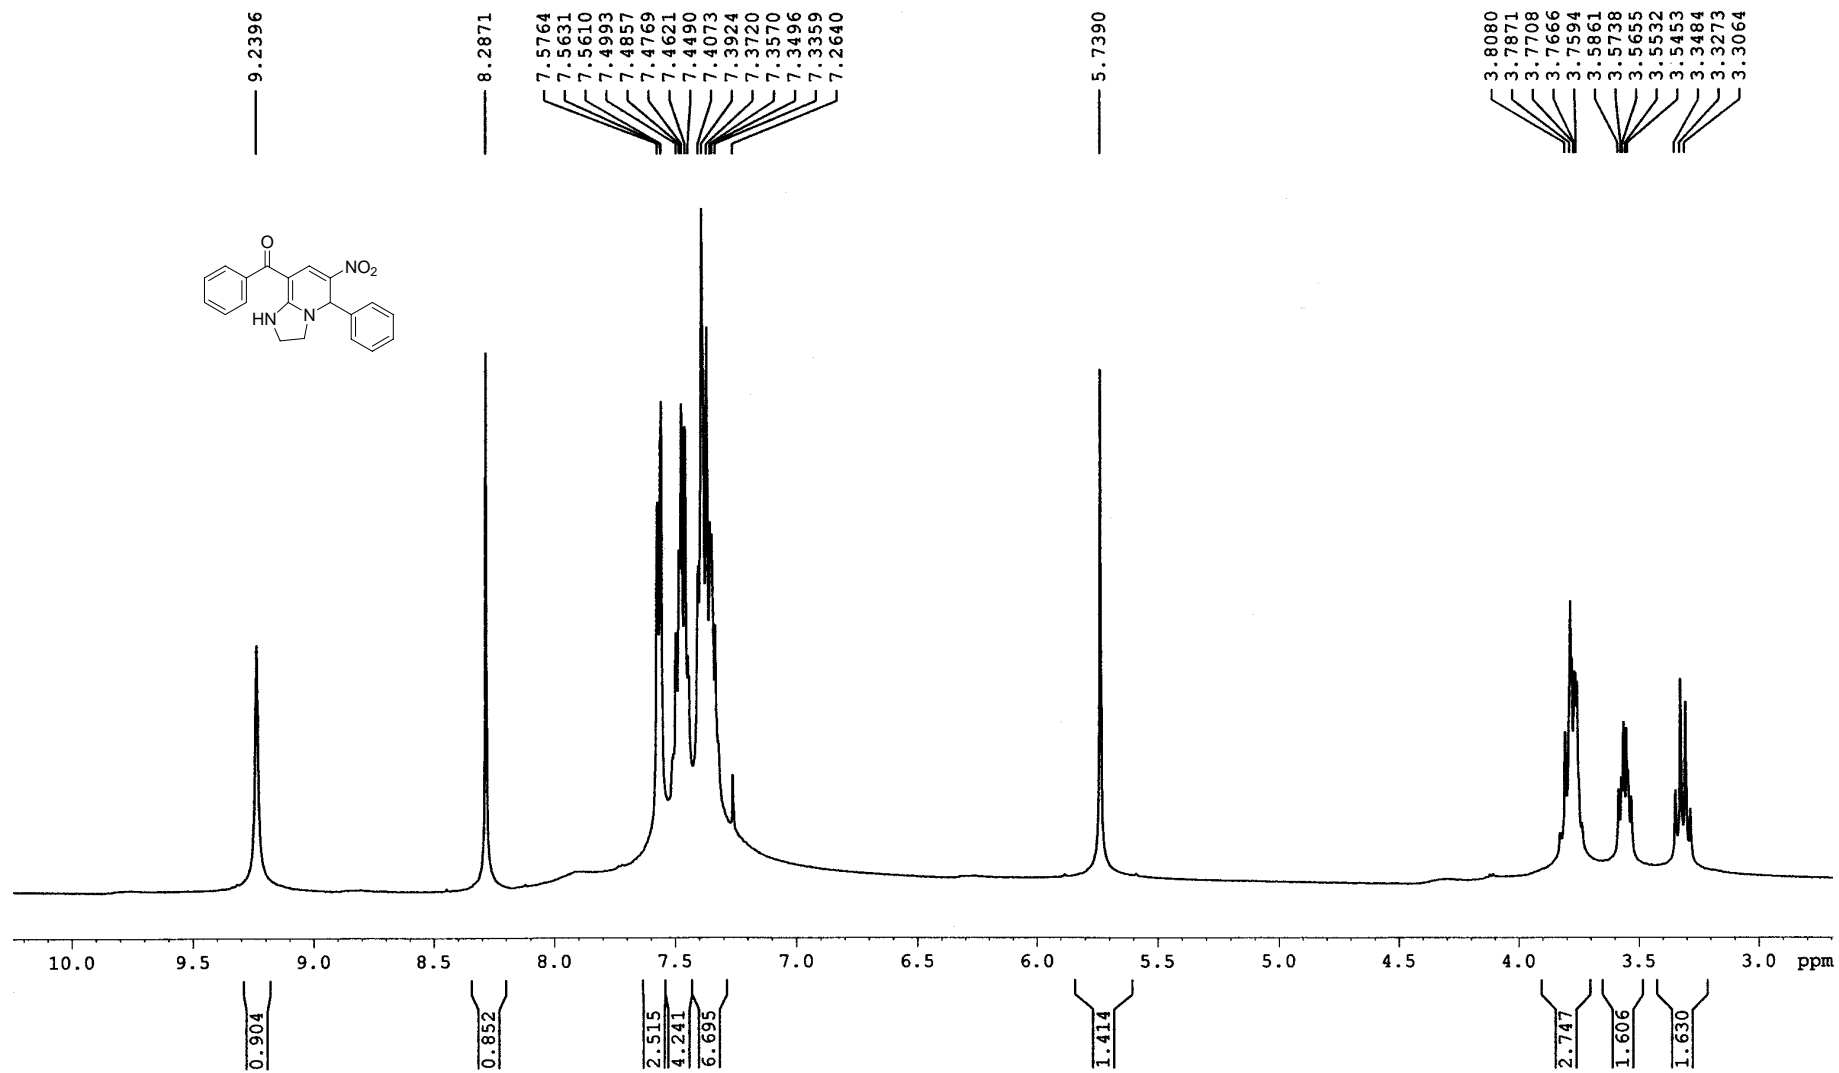

Figure 23. <sup>1</sup>H NMR (500 MHz, CDCl<sub>3</sub>) spectra of compound 4l

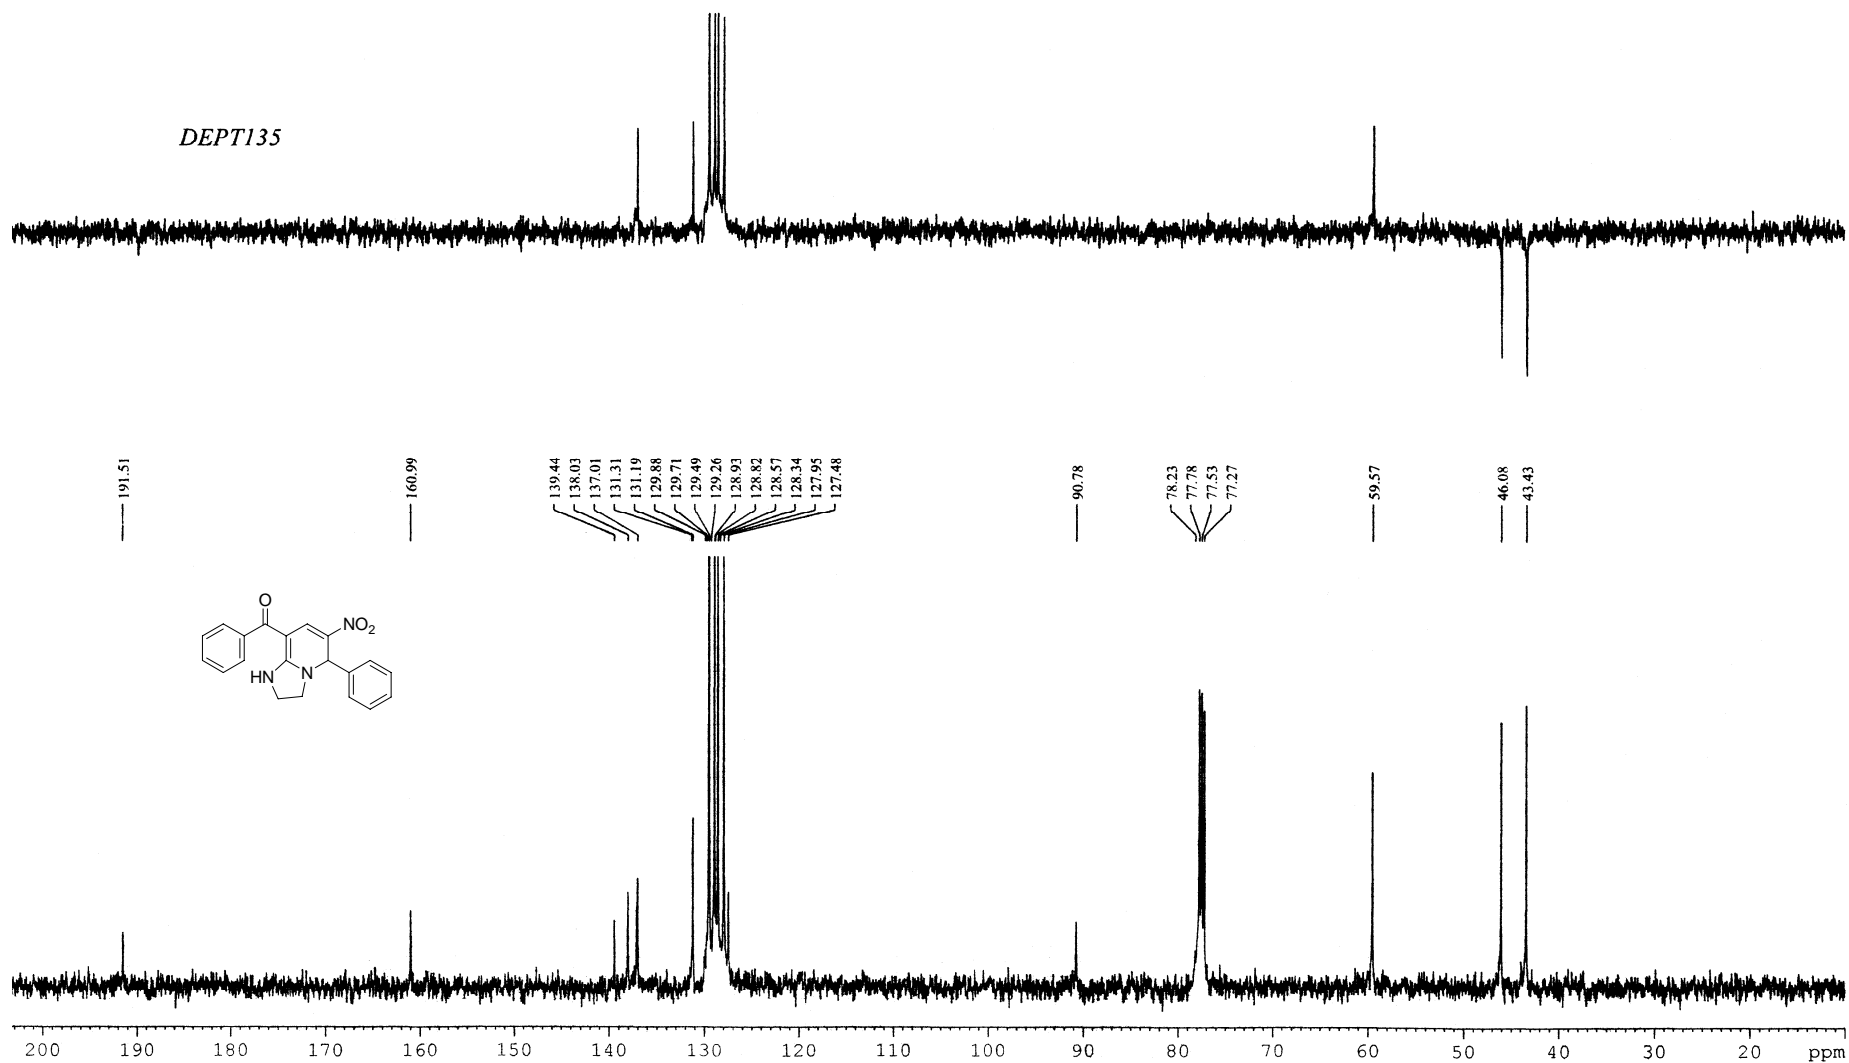

**Figure 24.**  $^{13}\text{C}$  NMR (125 MHz,  $\text{CDCl}_3$ ) spectra of compound **4I**

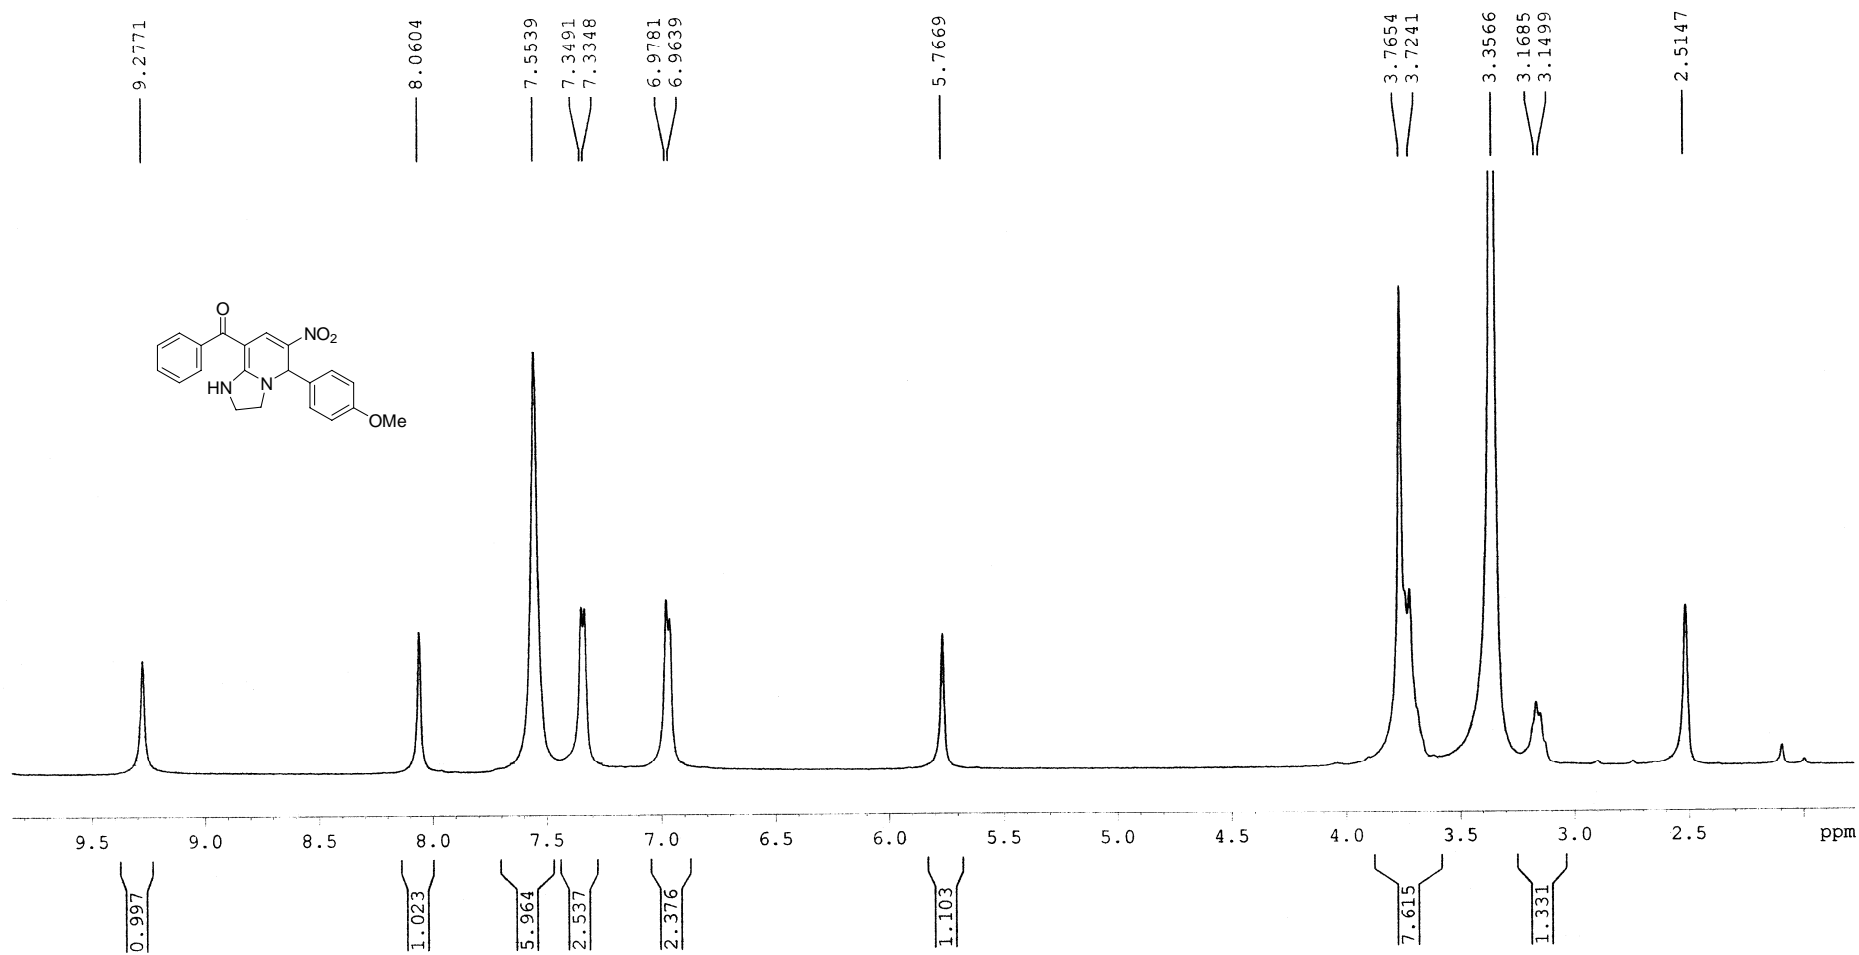

**Figure 25.** <sup>1</sup>H NMR (500 MHz, DMSO-*d*<sub>6</sub>) spectra of compound **4m**

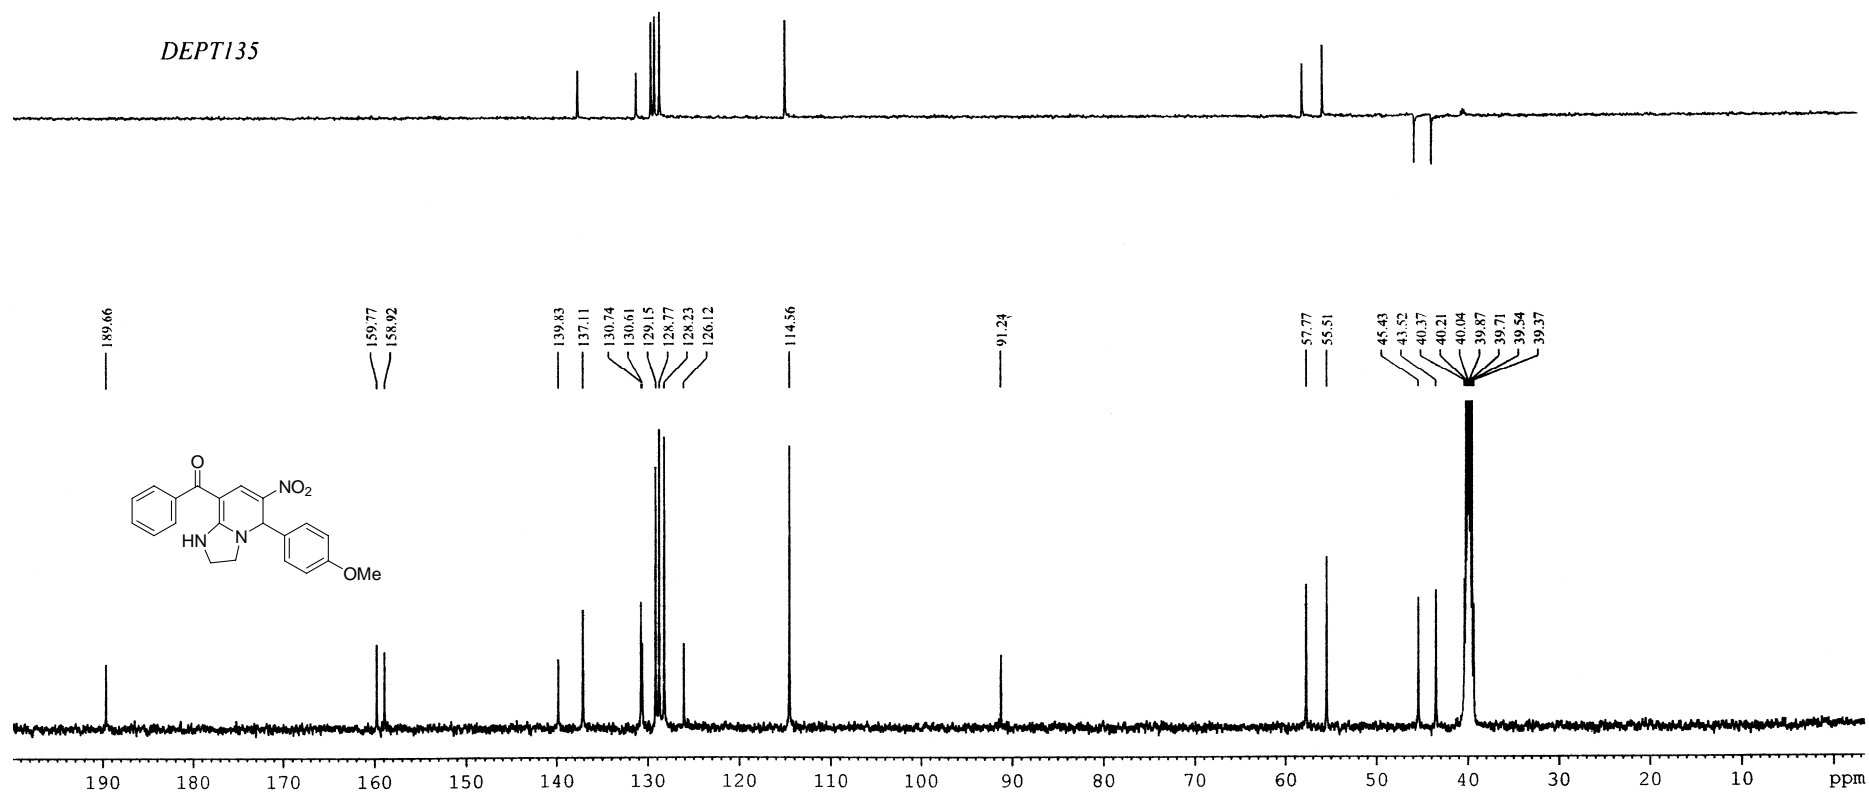

Figure 26.  $^{13}\text{C}$  NMR (125 MHz,  $\text{DMSO-}d_6$ ) spectra of compound 4m



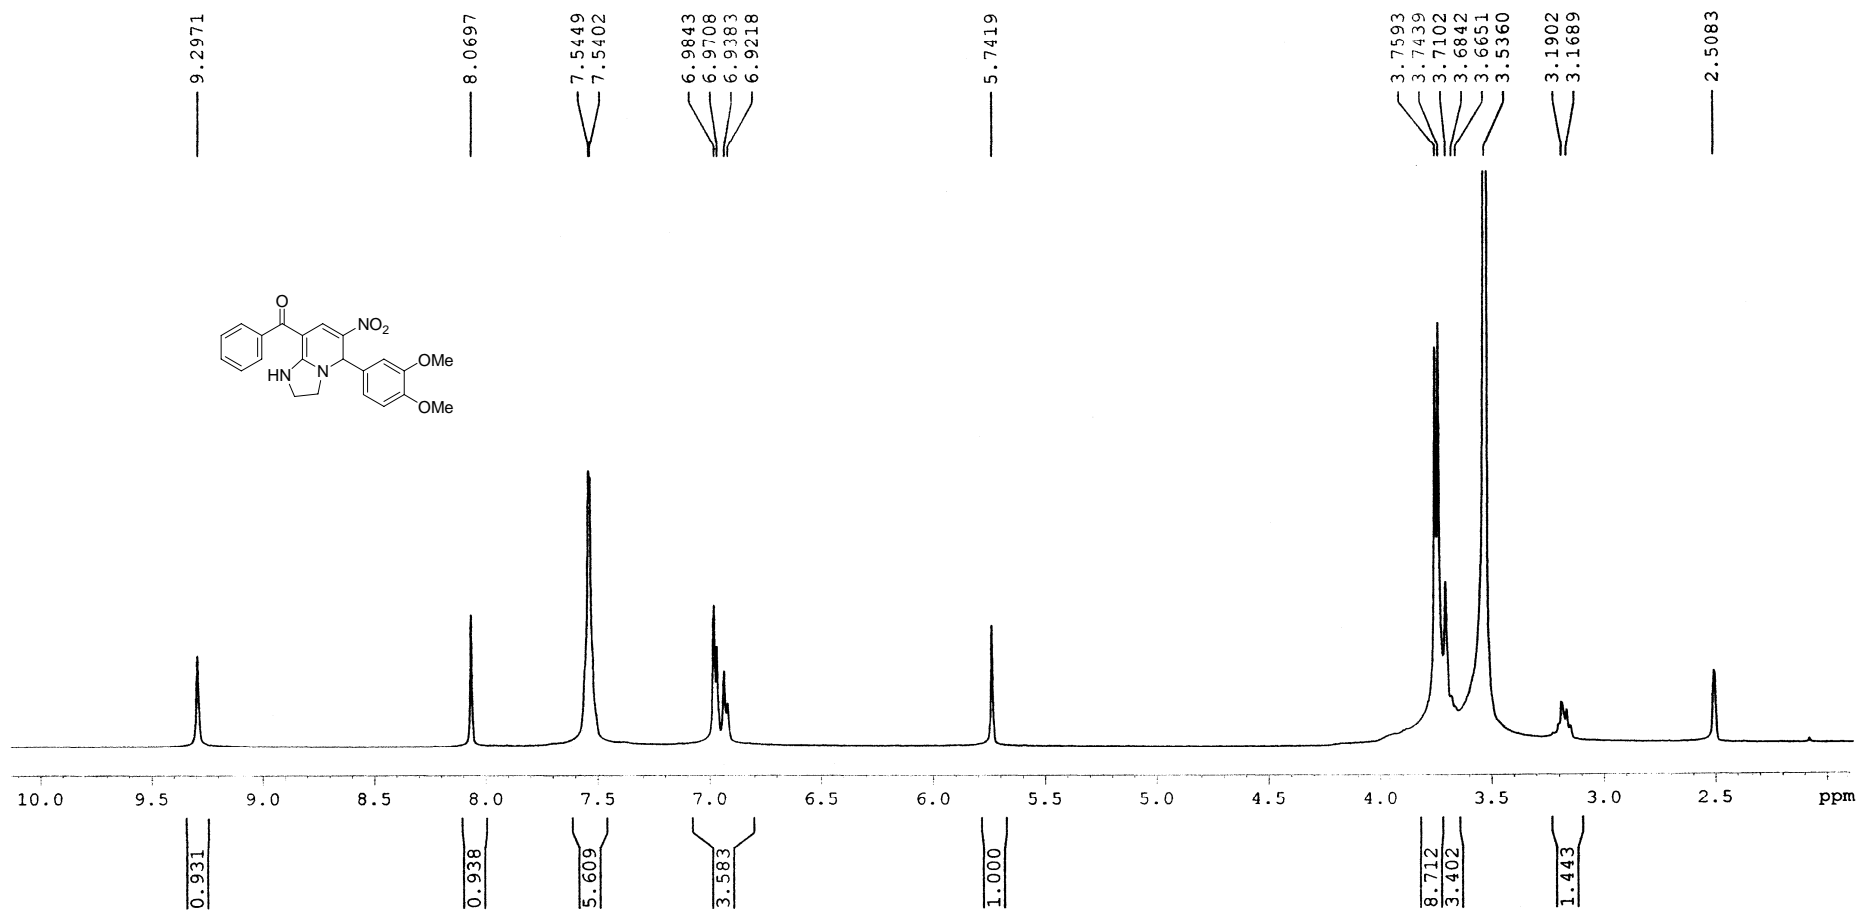

**Figure 27.** <sup>1</sup>H NMR (500 MHz, DMSO-*d*<sub>6</sub>) spectra of compound **4n**

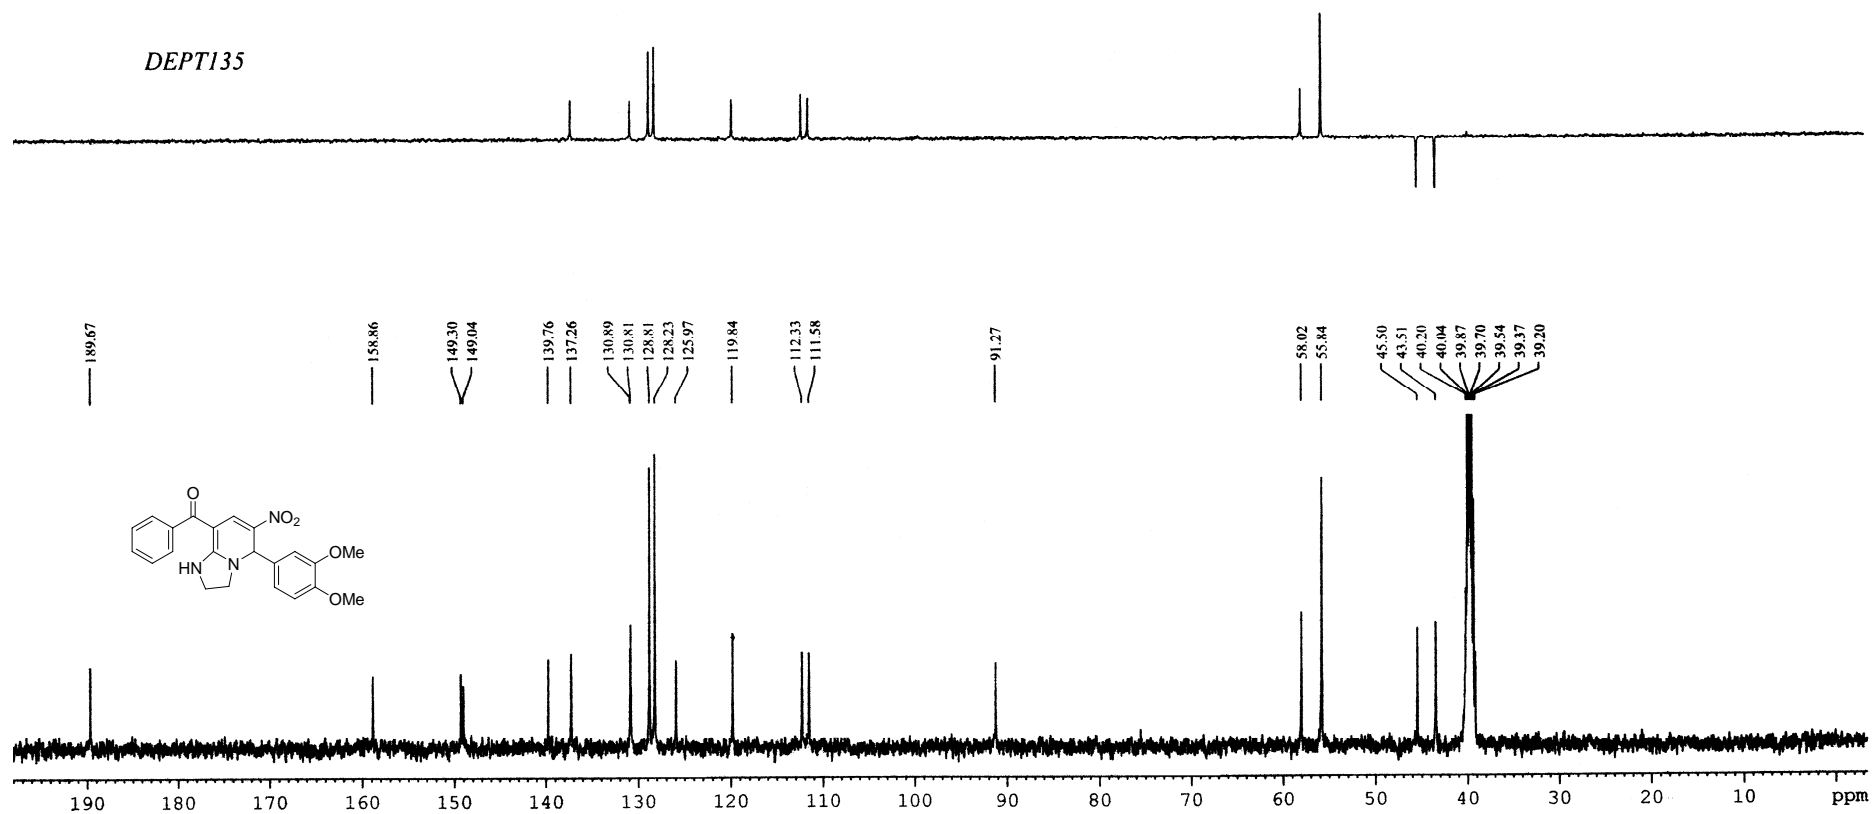

Figure 28.  $^{13}\text{C}$  NMR (125 MHz,  $\text{DMSO-}d_6$ ) spectra of compound **4n**

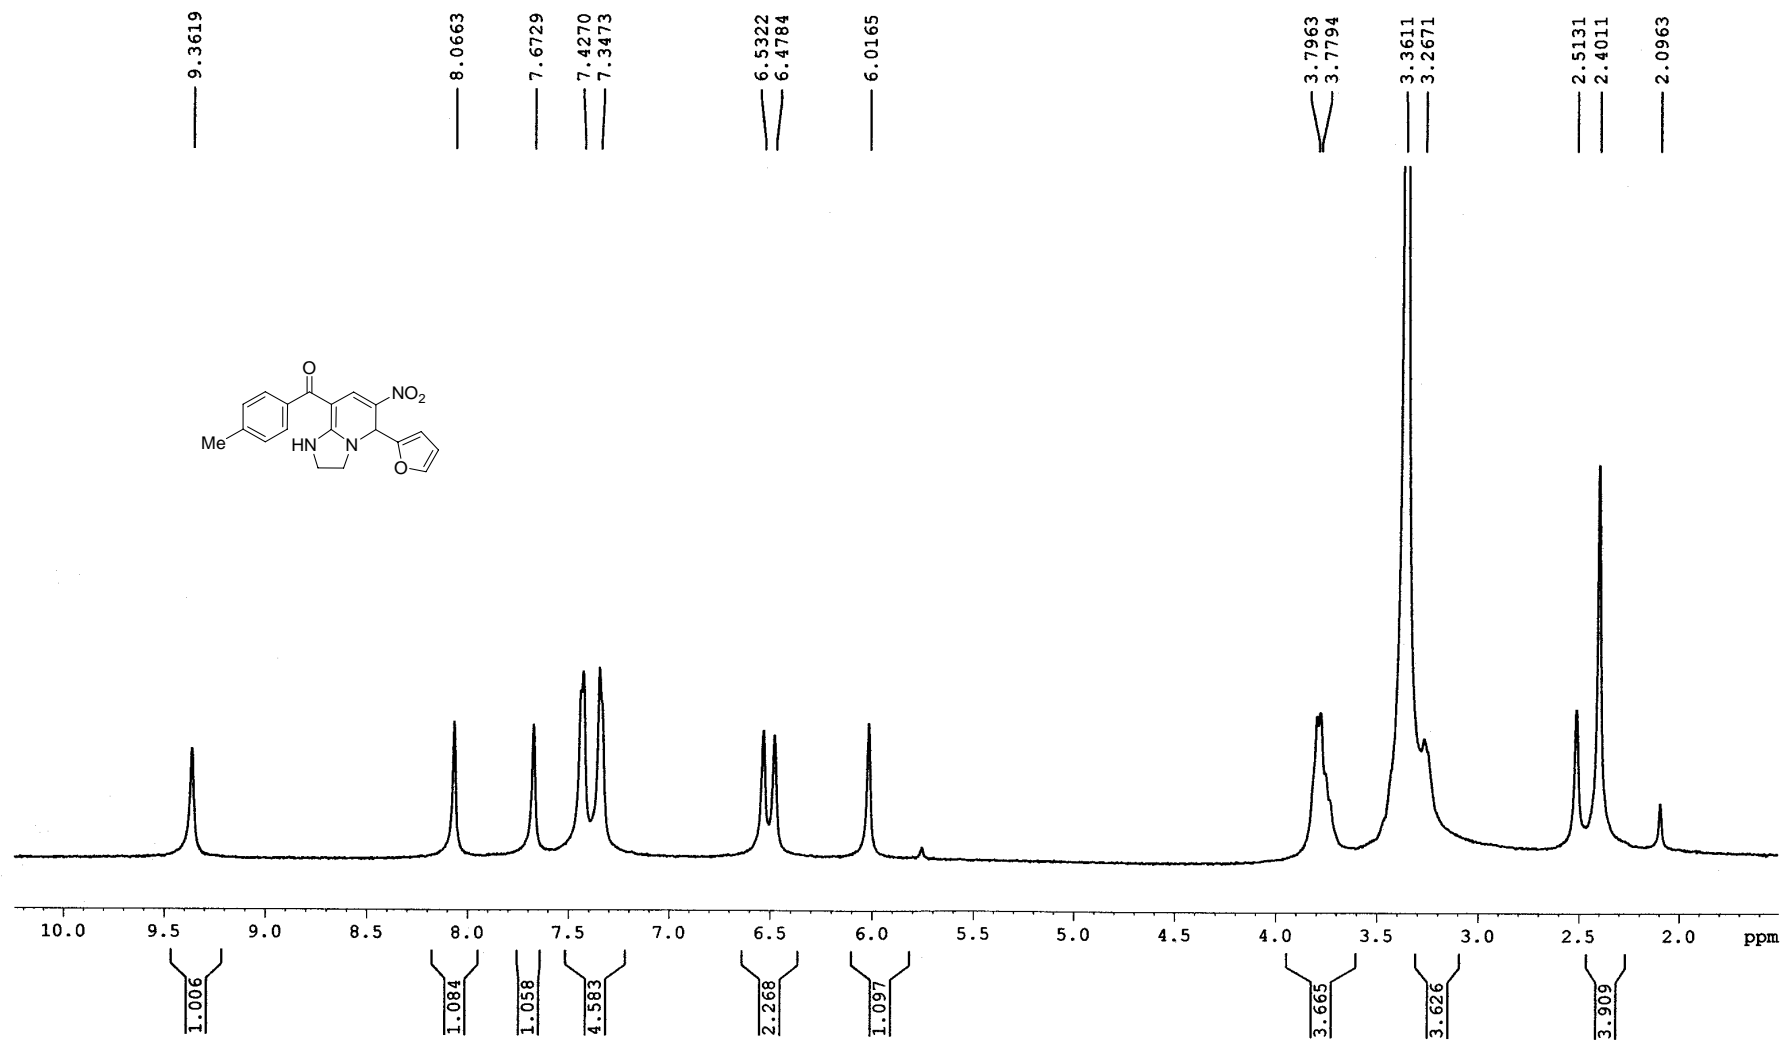

Figure 29. <sup>1</sup>H NMR (500 MHz, DMSO-*d*<sub>6</sub>) spectra of compound 4o

DEPT135

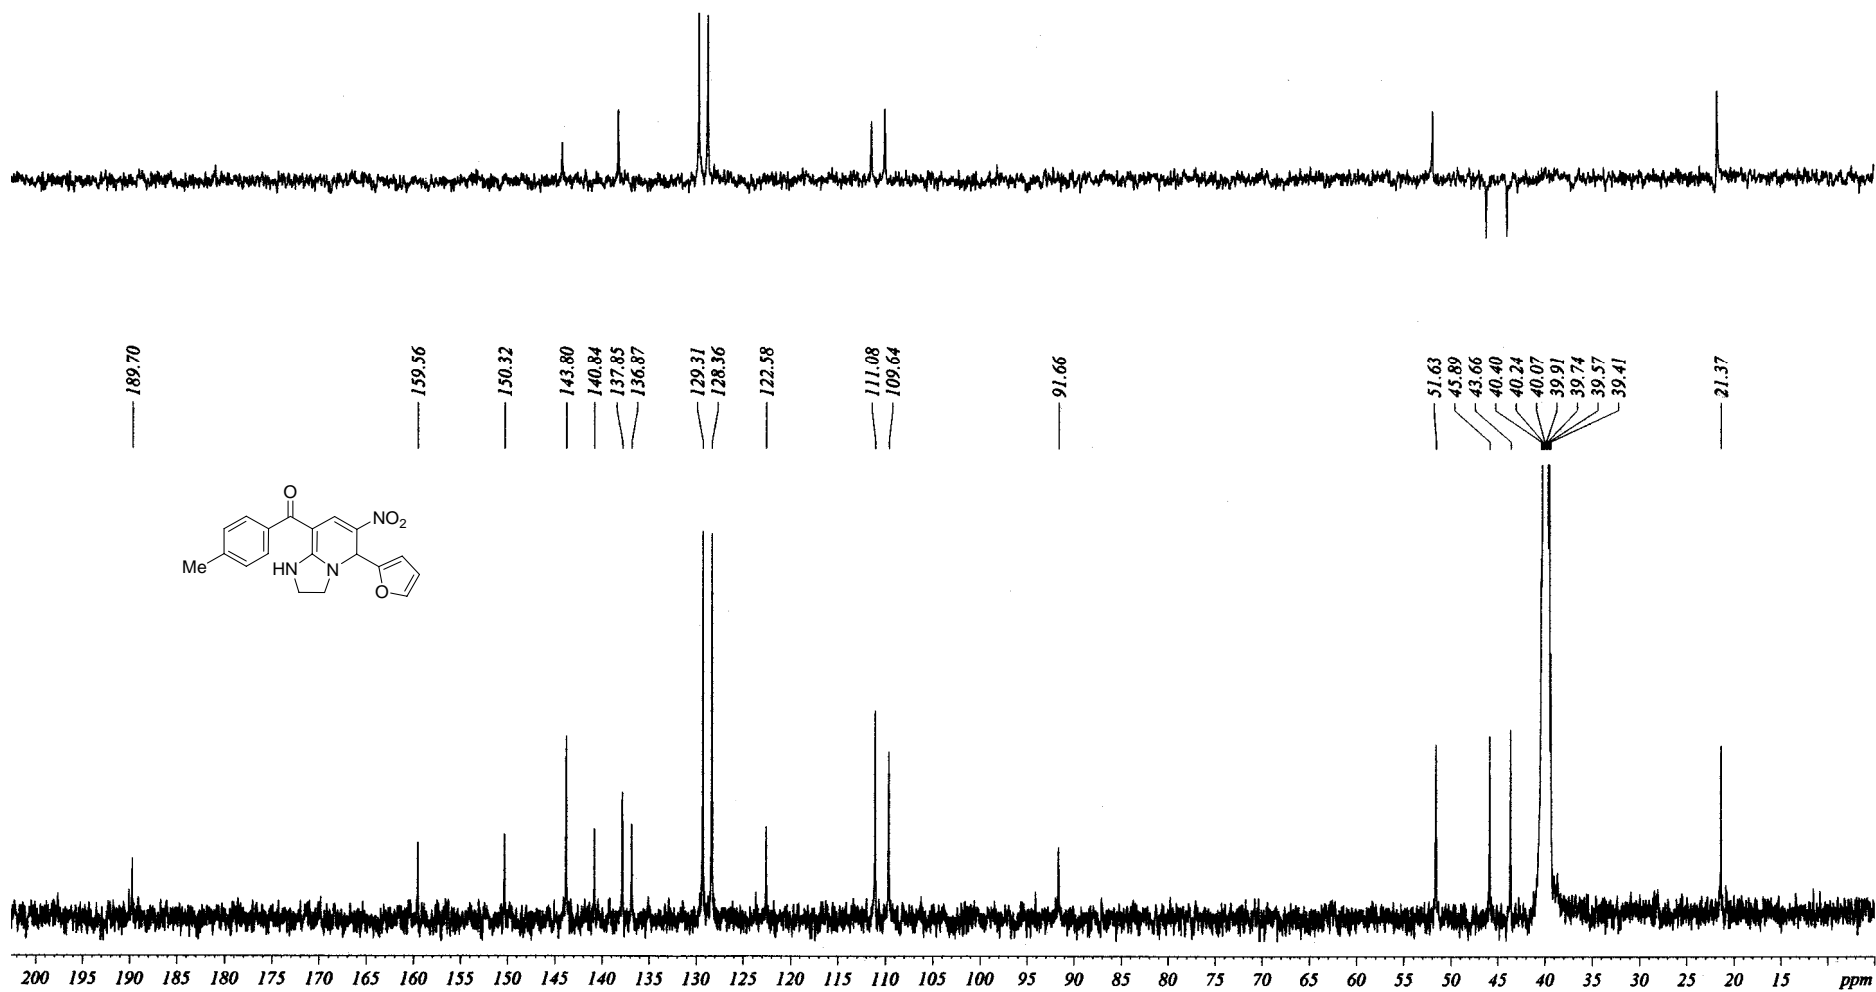

Figure 30.  $^{13}\text{C}$  NMR (125 MHz, DMSO- $d_6$ ) spectra of compound 40

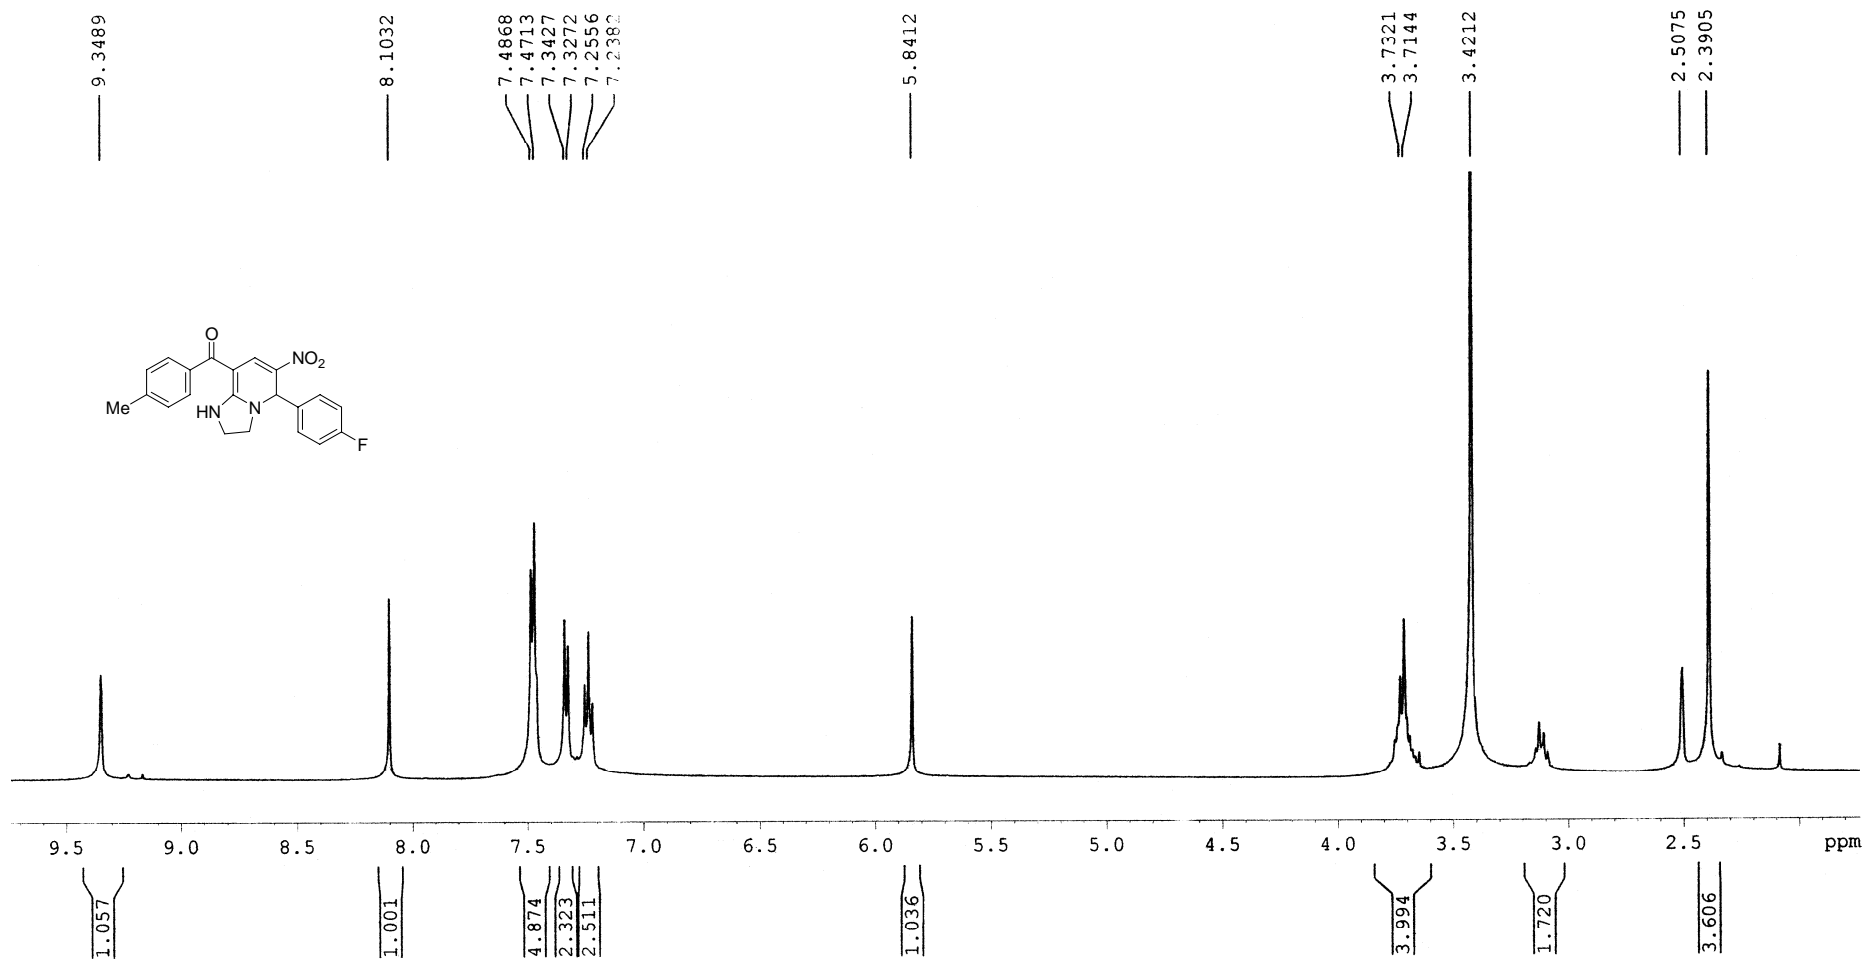

**Figure 31.** <sup>1</sup>H NMR (500 MHz, DMSO-*d*<sub>6</sub>) spectra of compound 4p

DEPT135

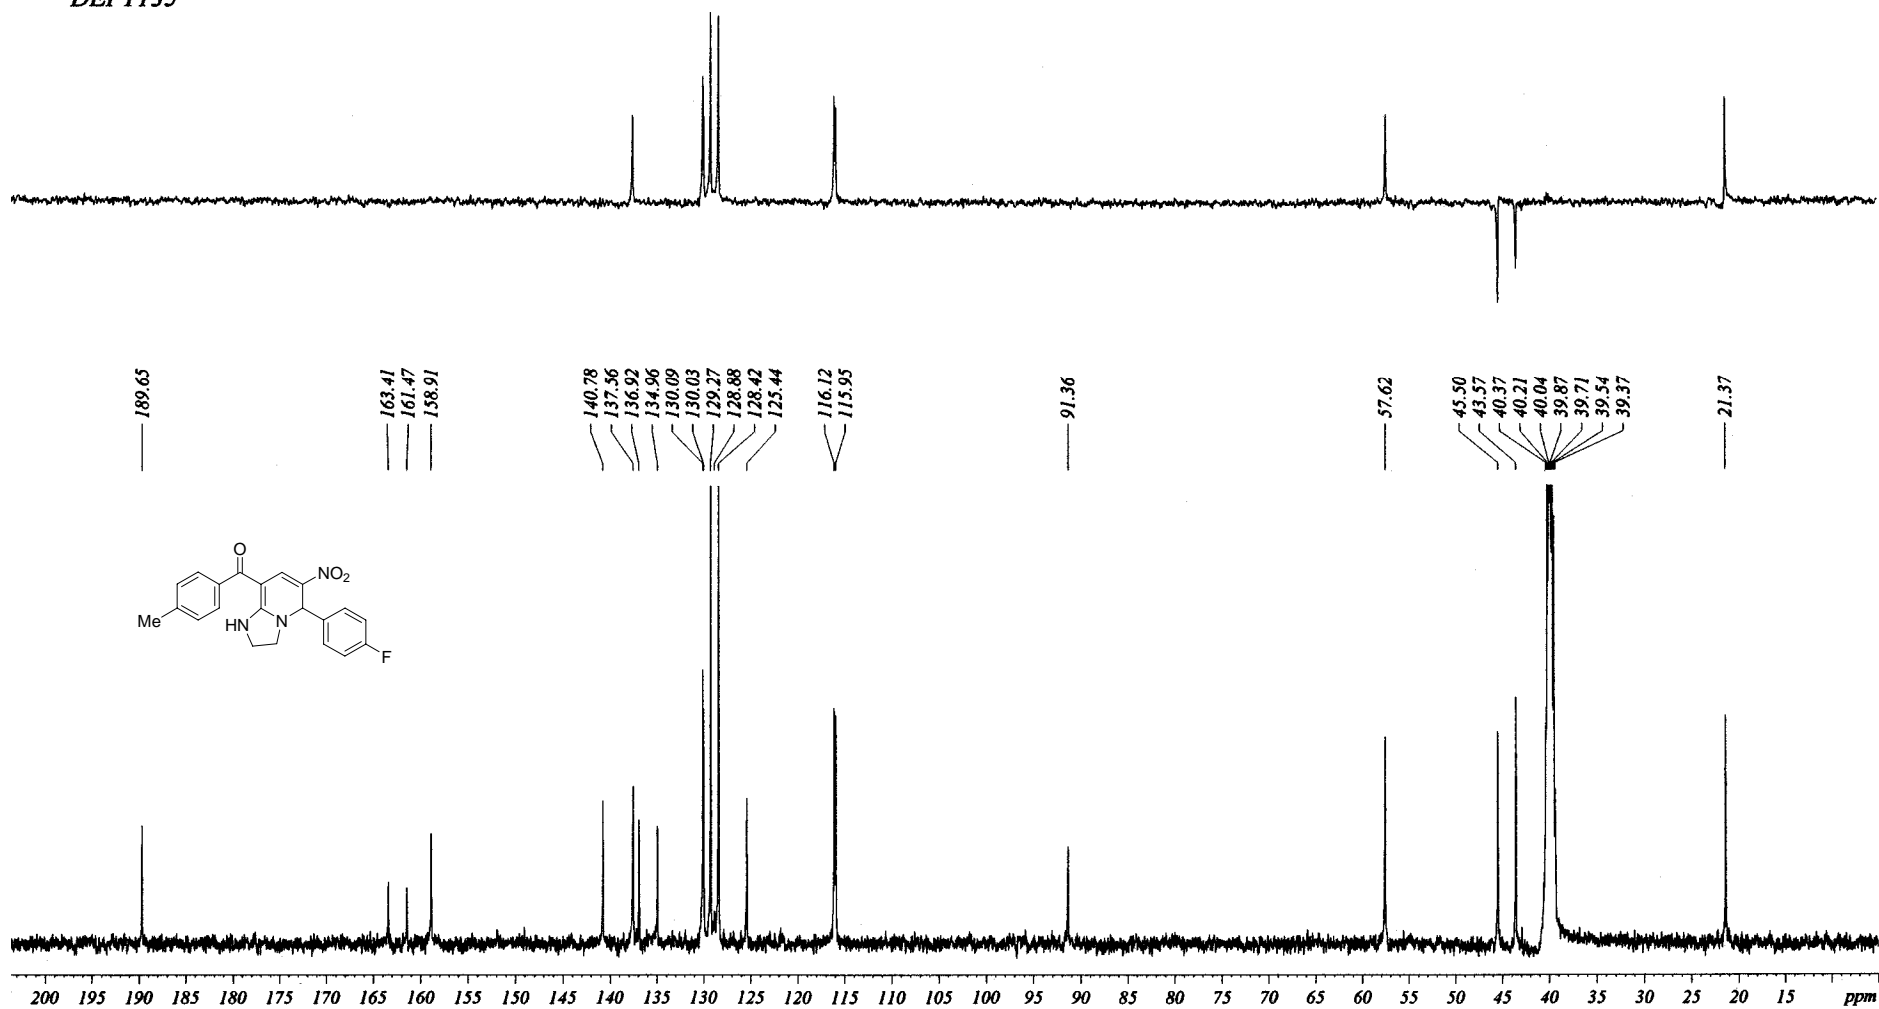

Figure 32. <sup>13</sup>C NMR (125 MHz, DMSO-*d*<sub>6</sub>) spectra of compound 4p

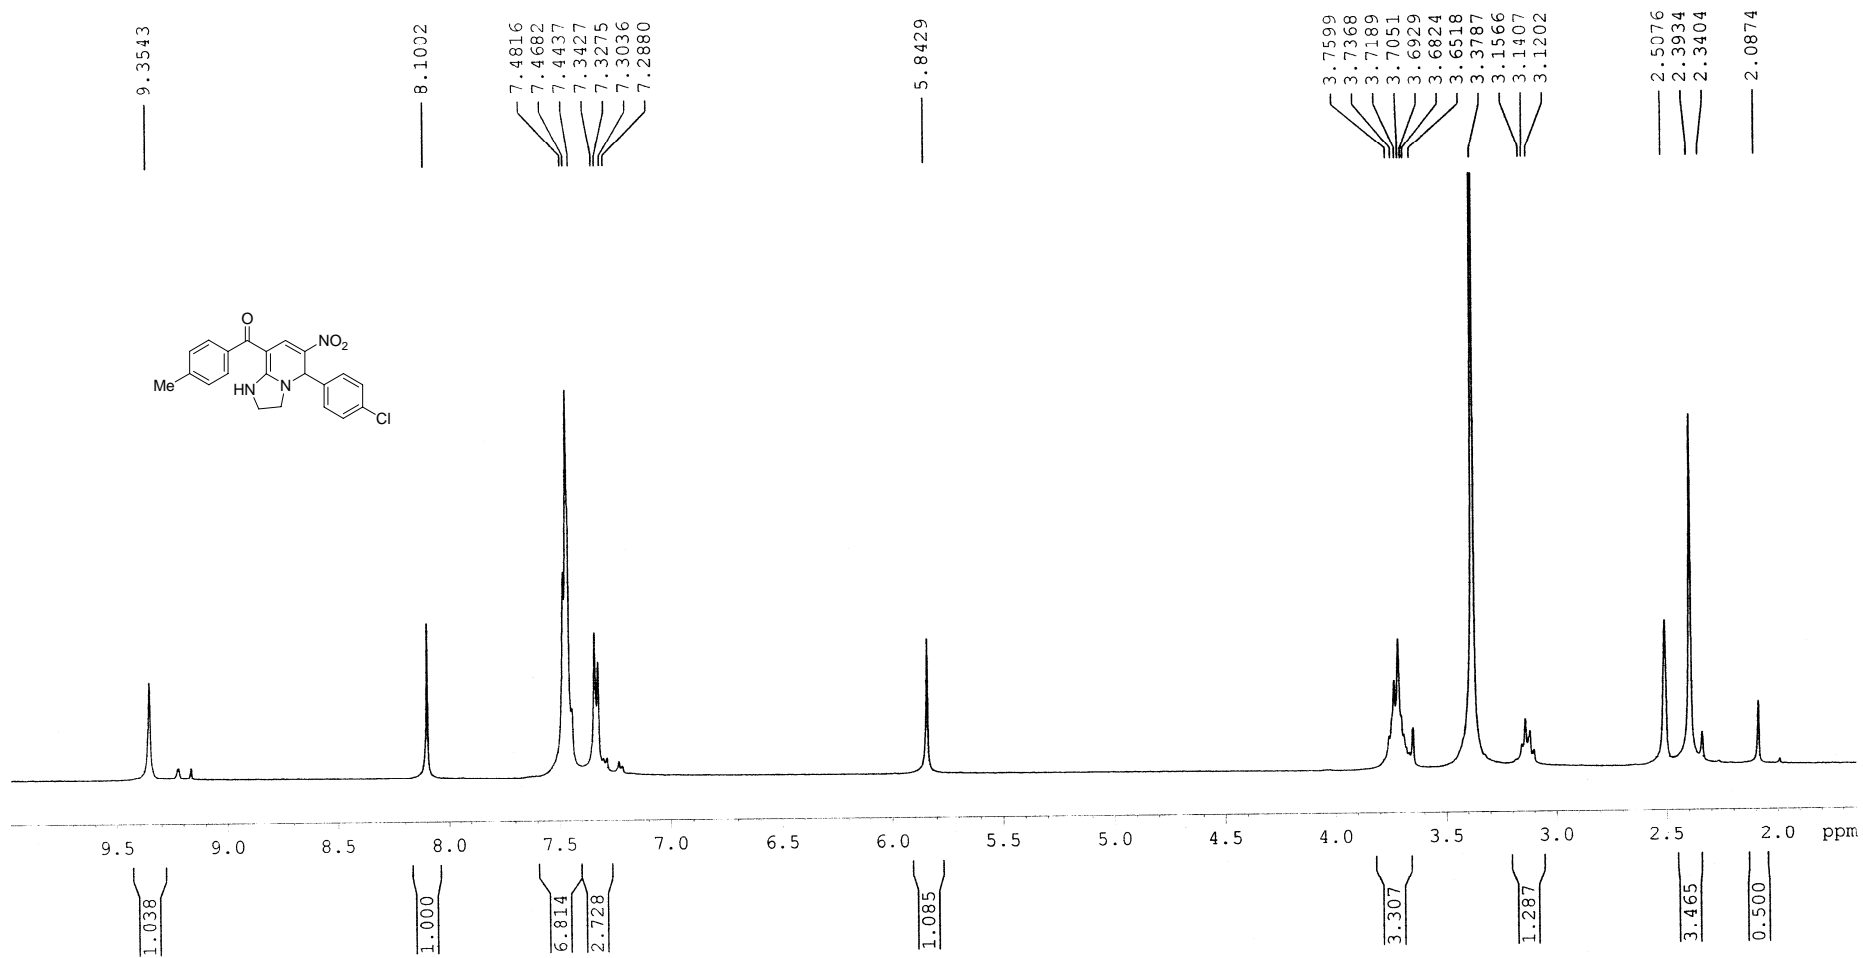

**Figure 33.**  $^1\text{H}$  NMR (500 MHz,  $\text{DMSO-}d_6$ ) spectra of compound **4q**

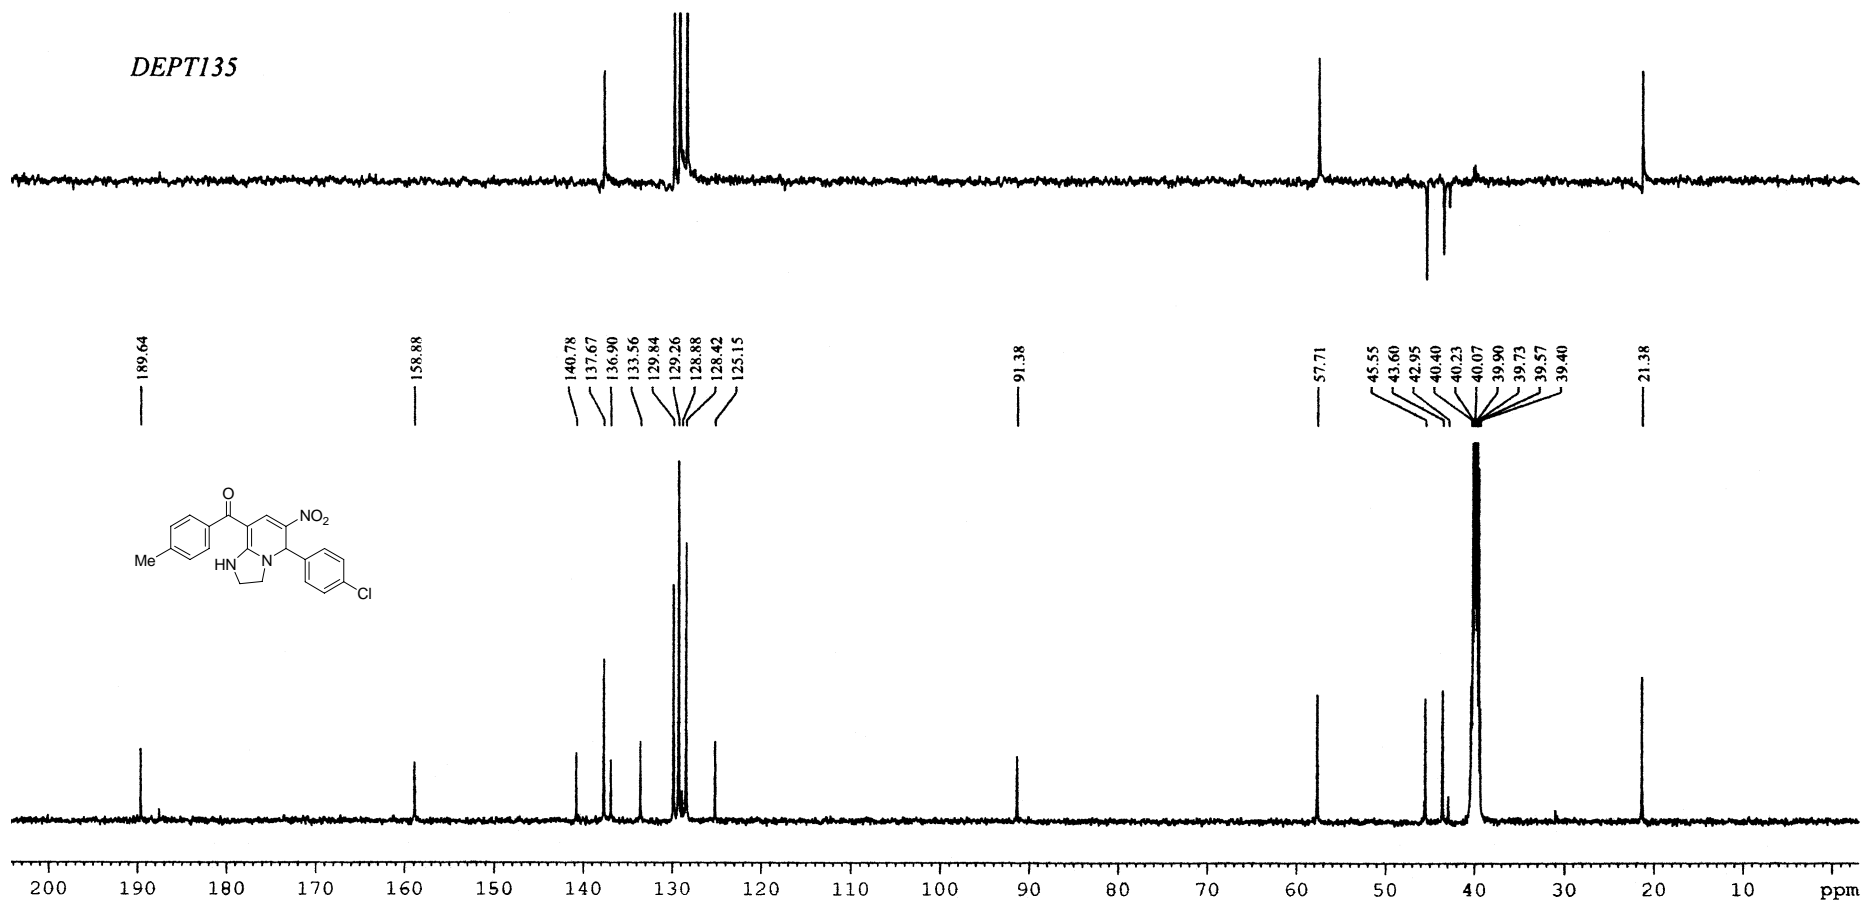

**Figure 34.** <sup>13</sup>C NMR (125 MHz, DMSO-*d*<sub>6</sub>) spectra of compound **4q**



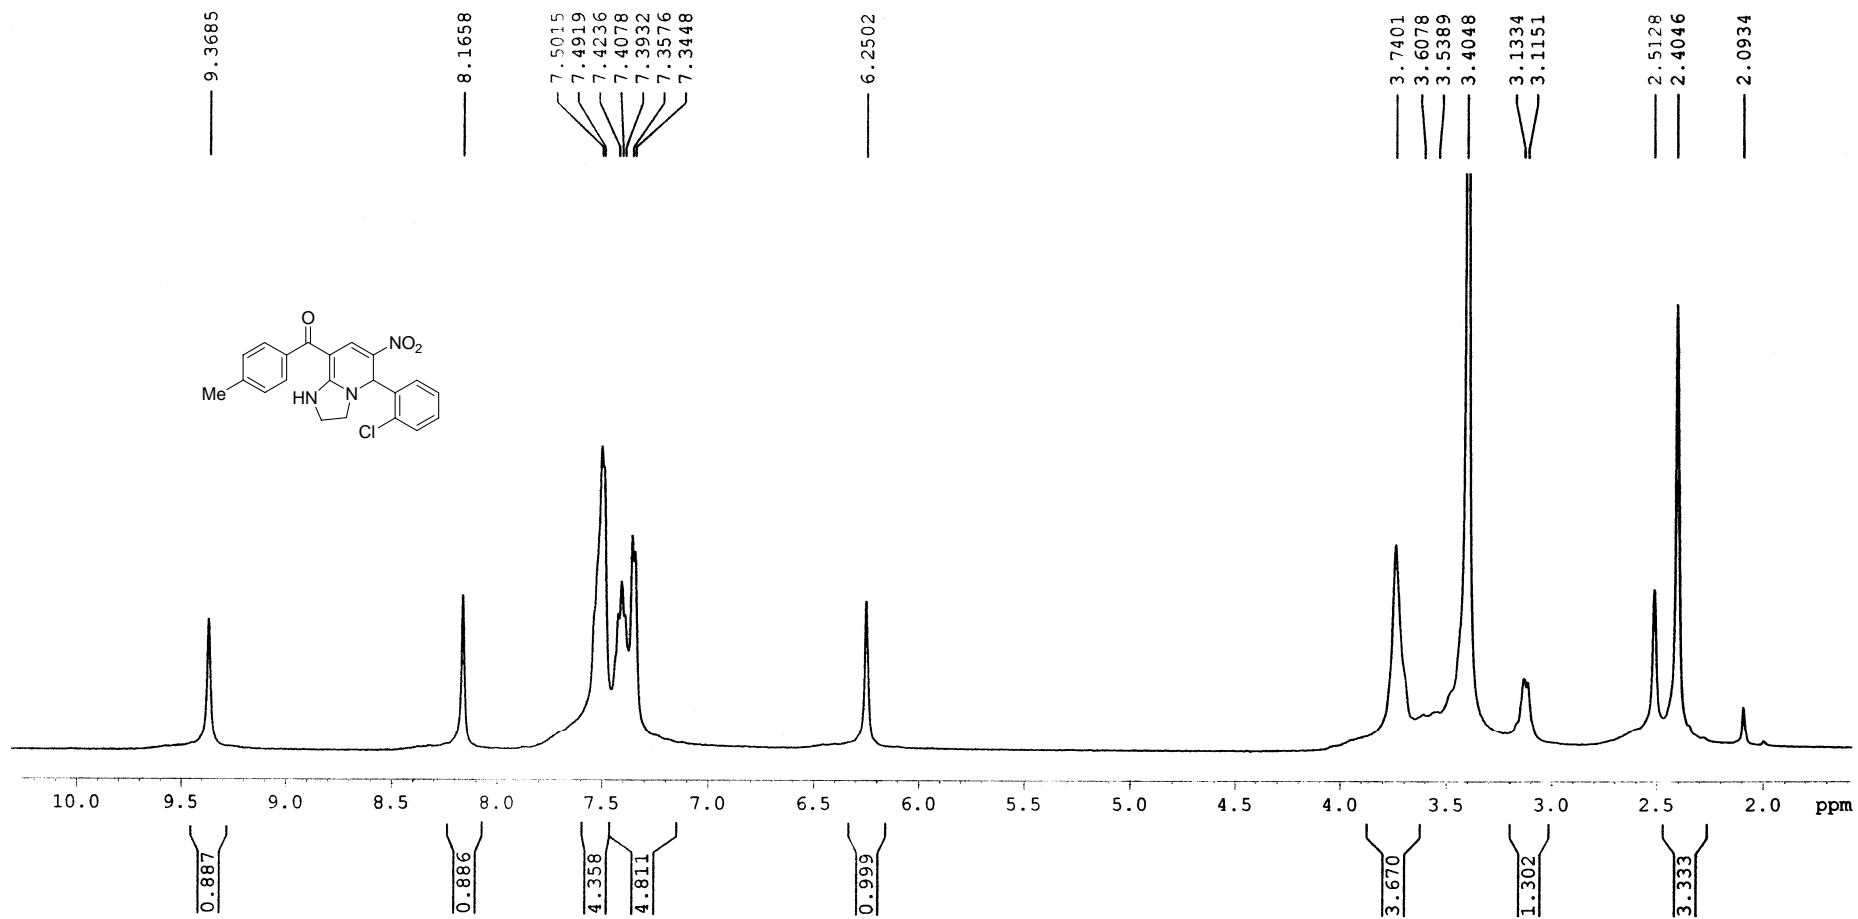

**Figure 35.** <sup>1</sup>H NMR (500 MHz, DMSO-*d*<sub>6</sub>) spectra of compound **4r**

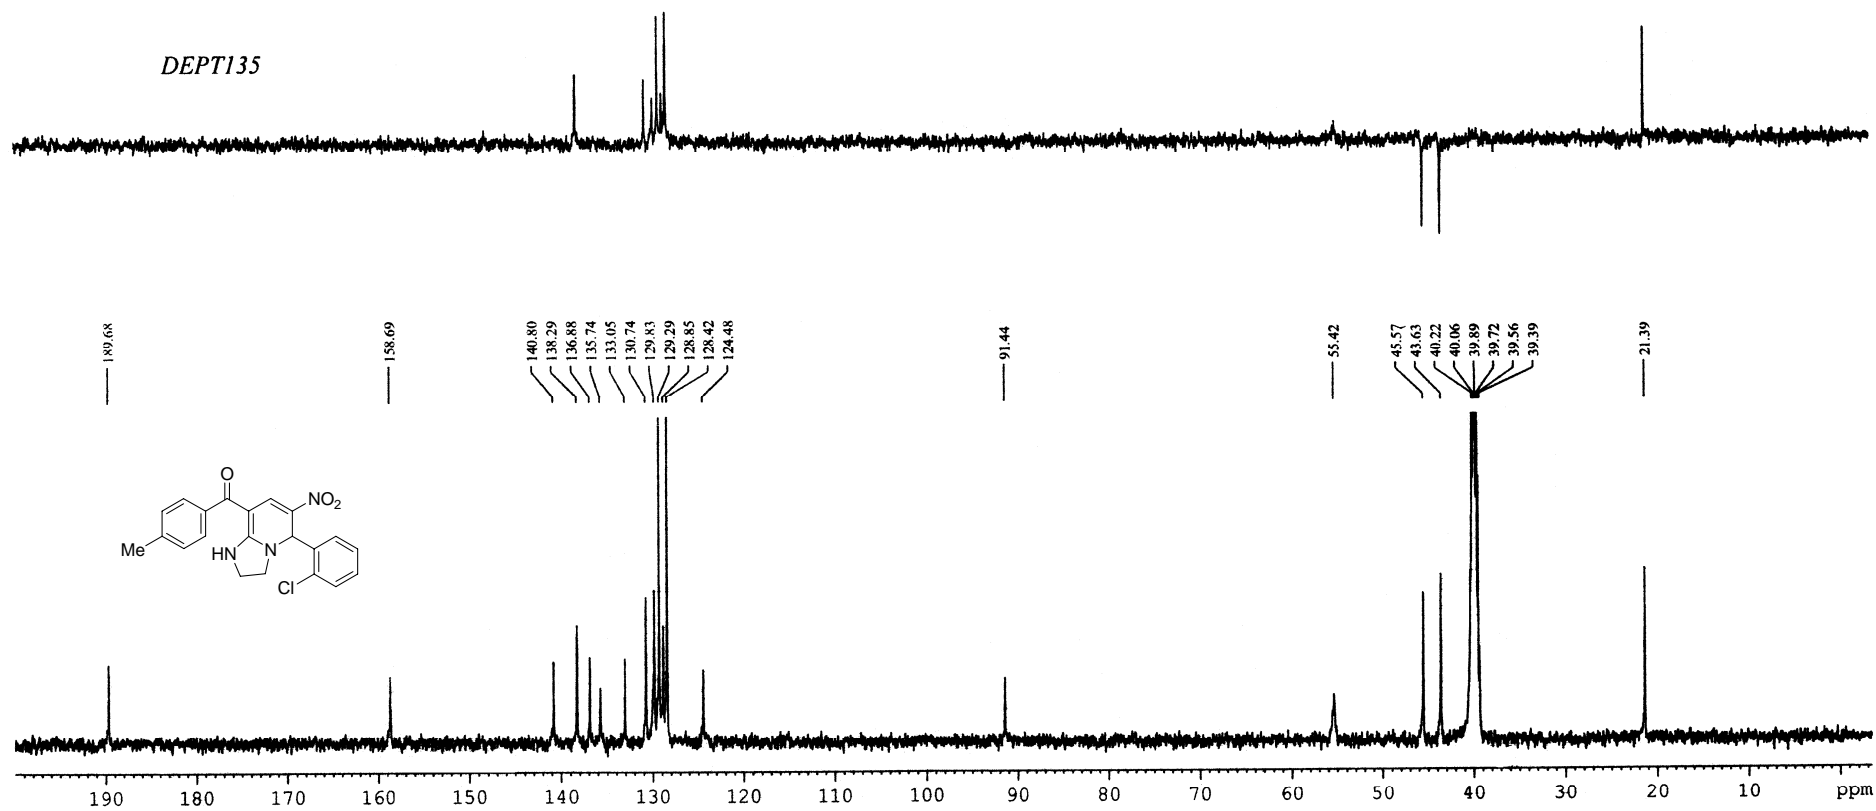

Figure 36.  $^{13}\text{C}$  NMR (125 MHz,  $\text{DMSO-}d_6$ ) spectra of compound 4r

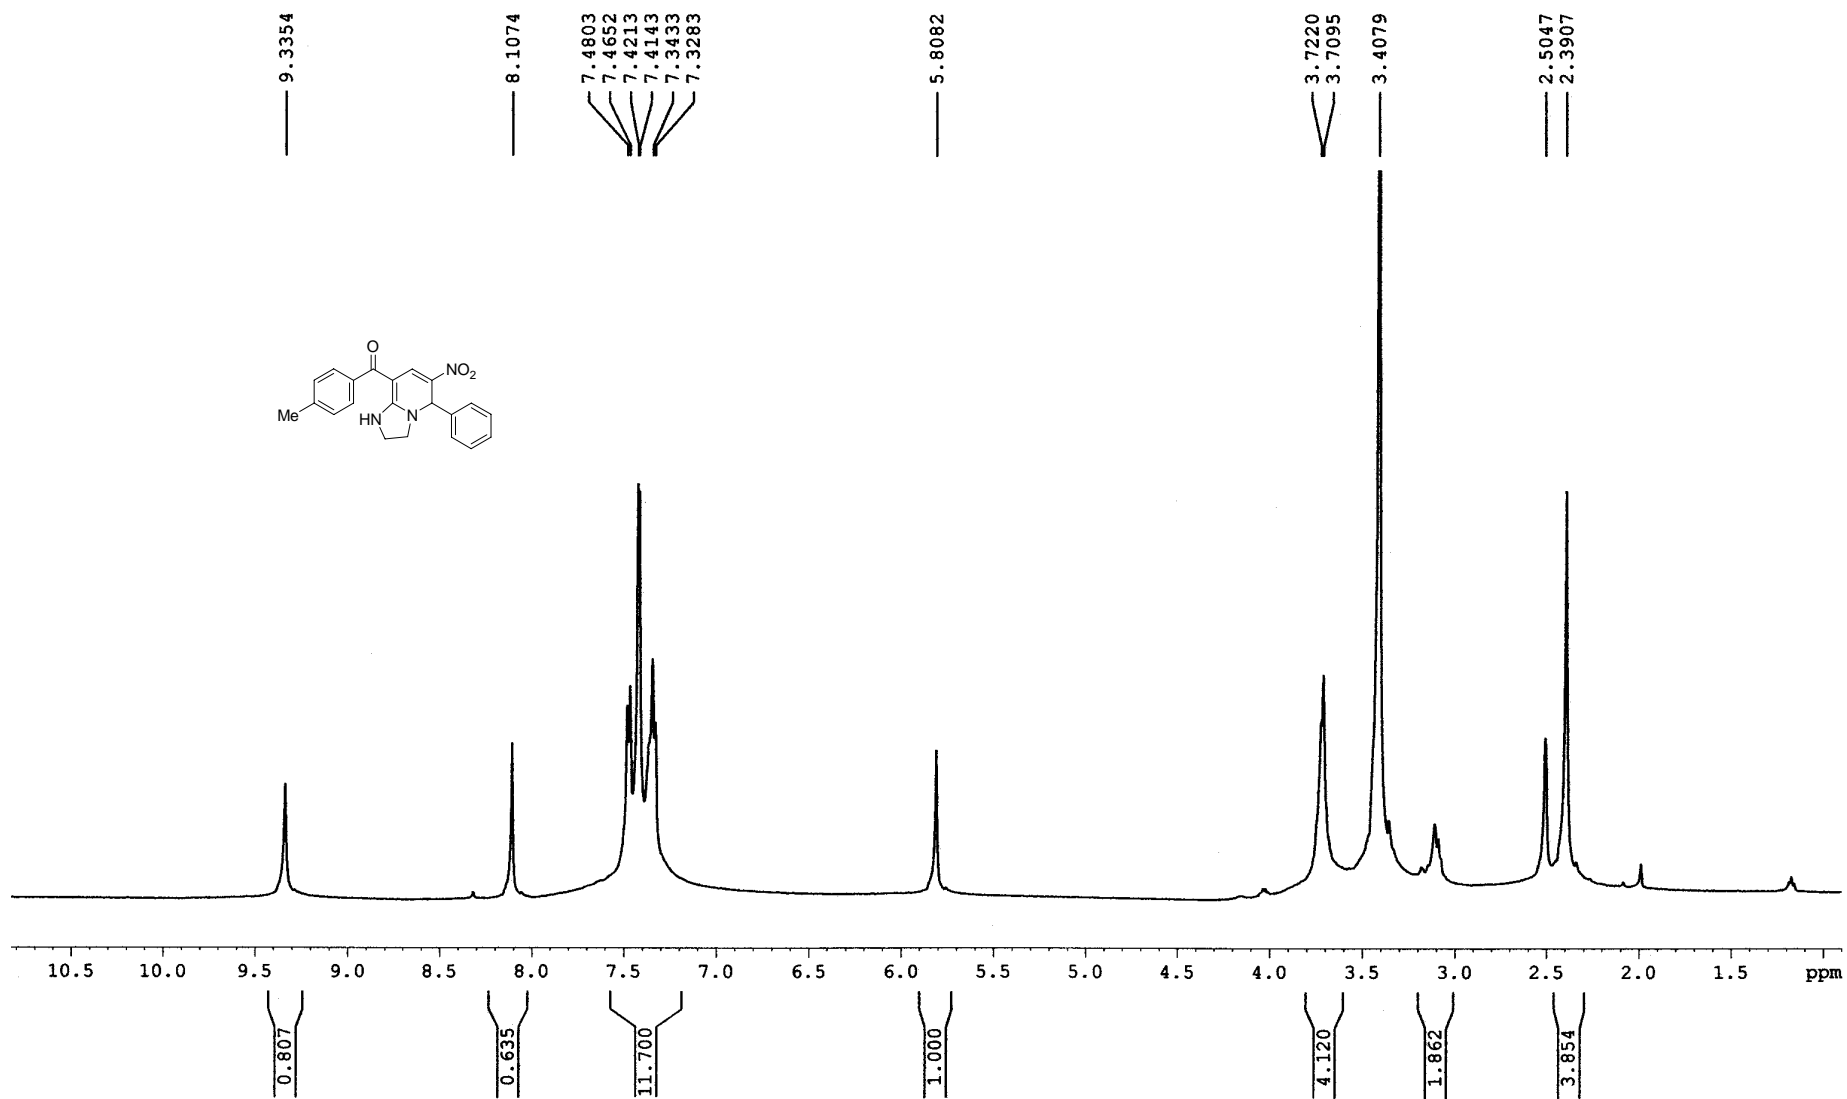

**Figure 37.** <sup>1</sup>H NMR (500 MHz, DMSO-*d*<sub>6</sub>) spectra of compound 4s

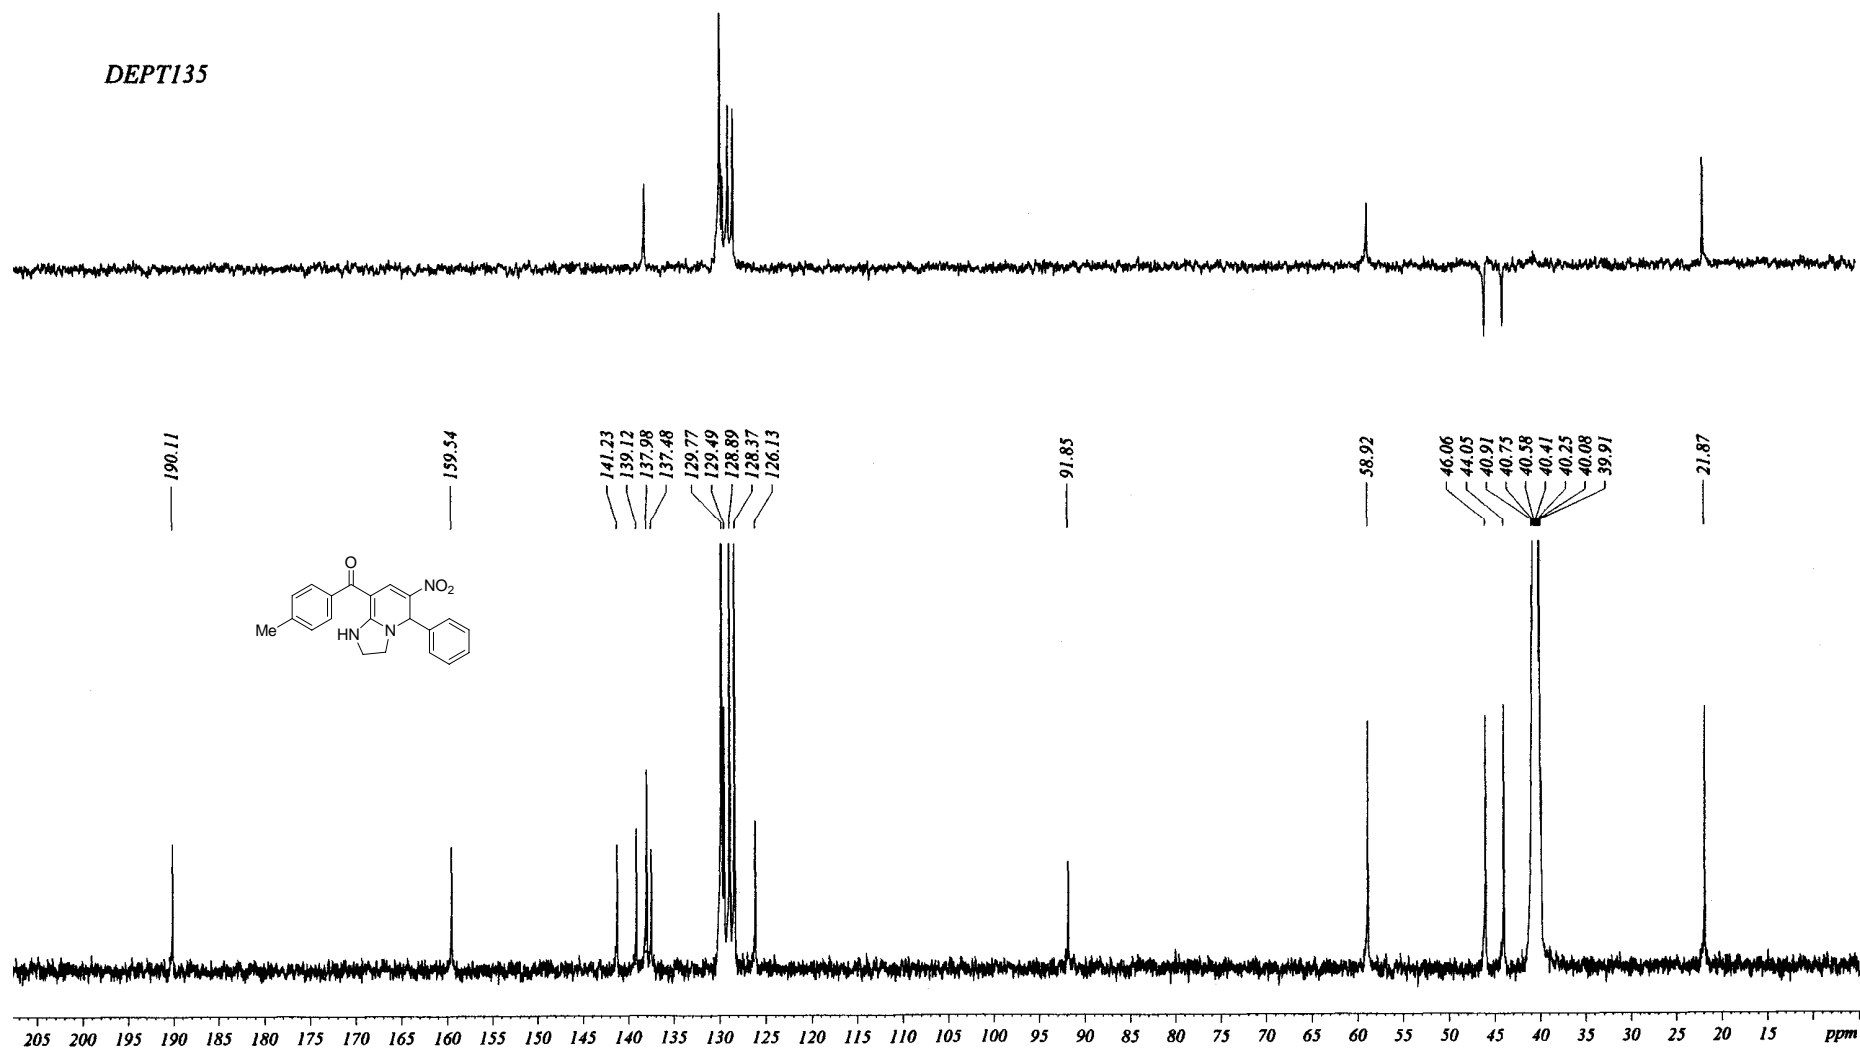

Figure 38.  $^{13}\text{C}$  NMR (125 MHz,  $\text{DMSO-}d_6$ ) spectra of compound 4s

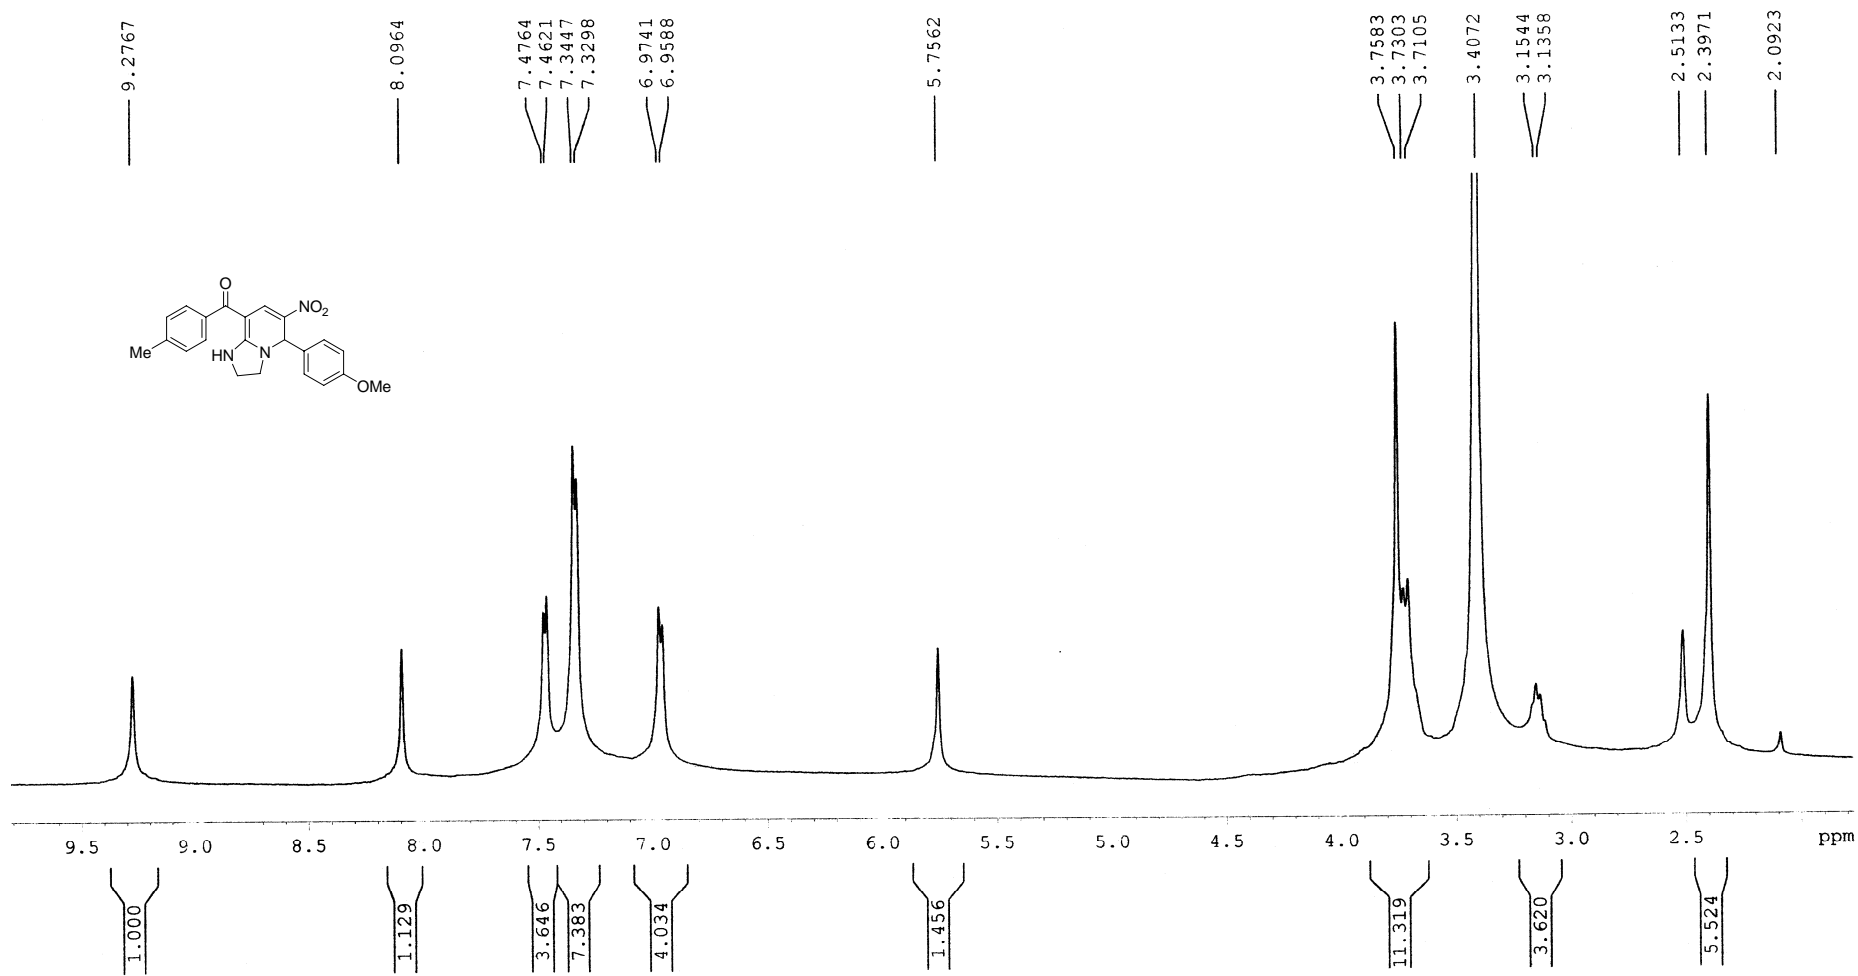

**Figure 39.** <sup>1</sup>H NMR (500 MHz, DMSO-*d*<sub>6</sub>) spectra of compound **4t**

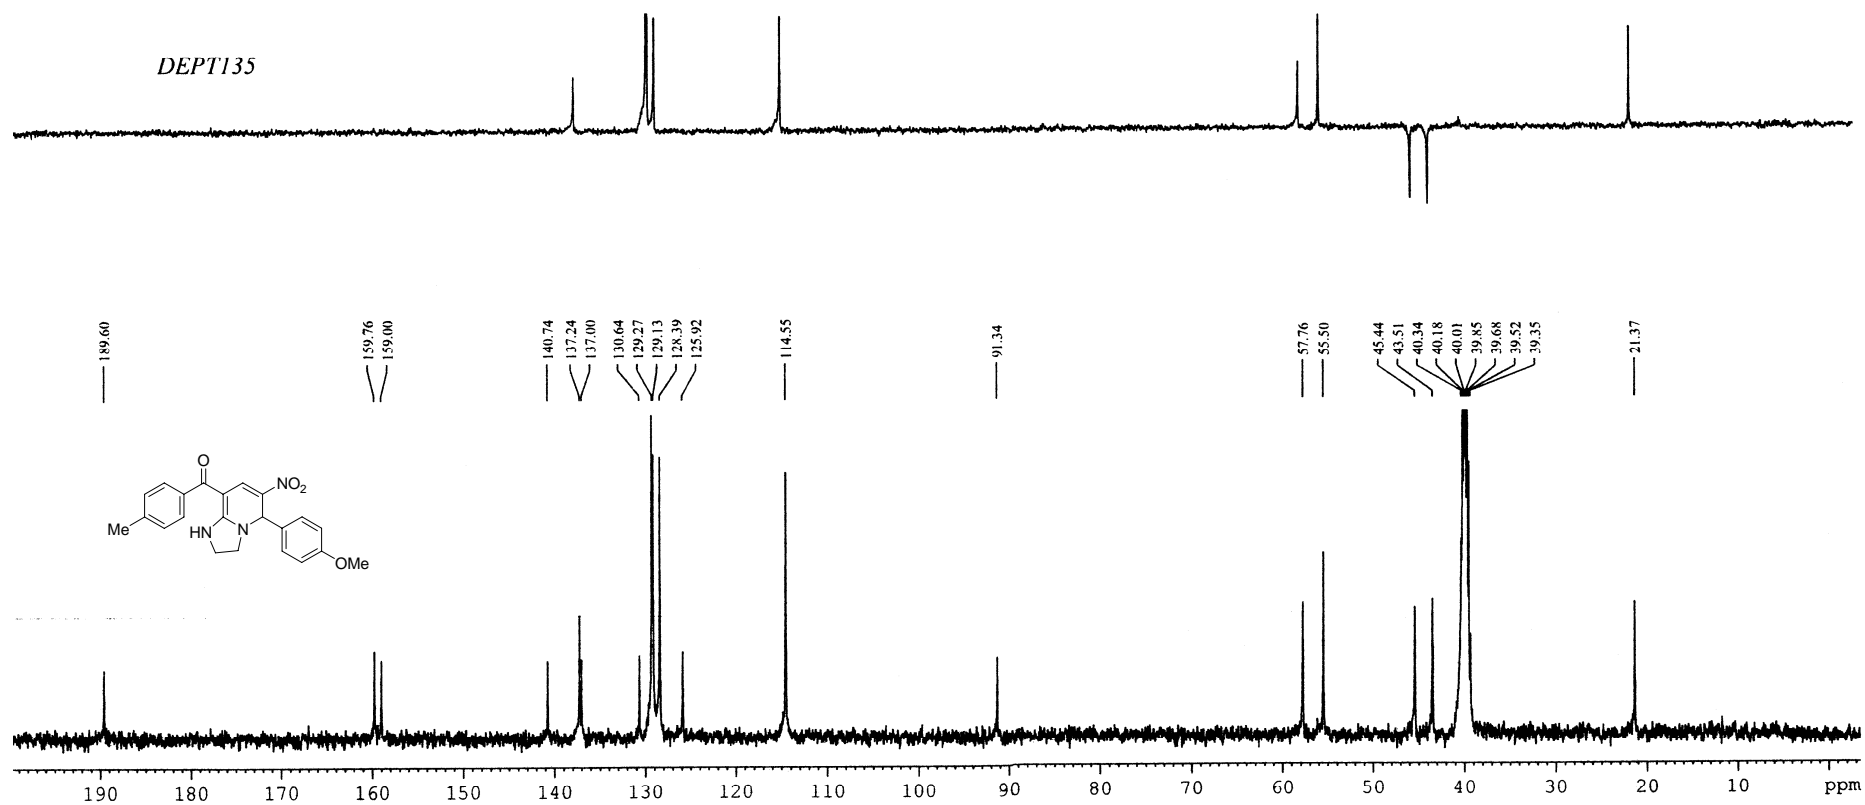

Figure 40.  $^{13}\text{C}$  NMR (125 MHz,  $\text{DMSO-}d_6$ ) spectra of compound 4t

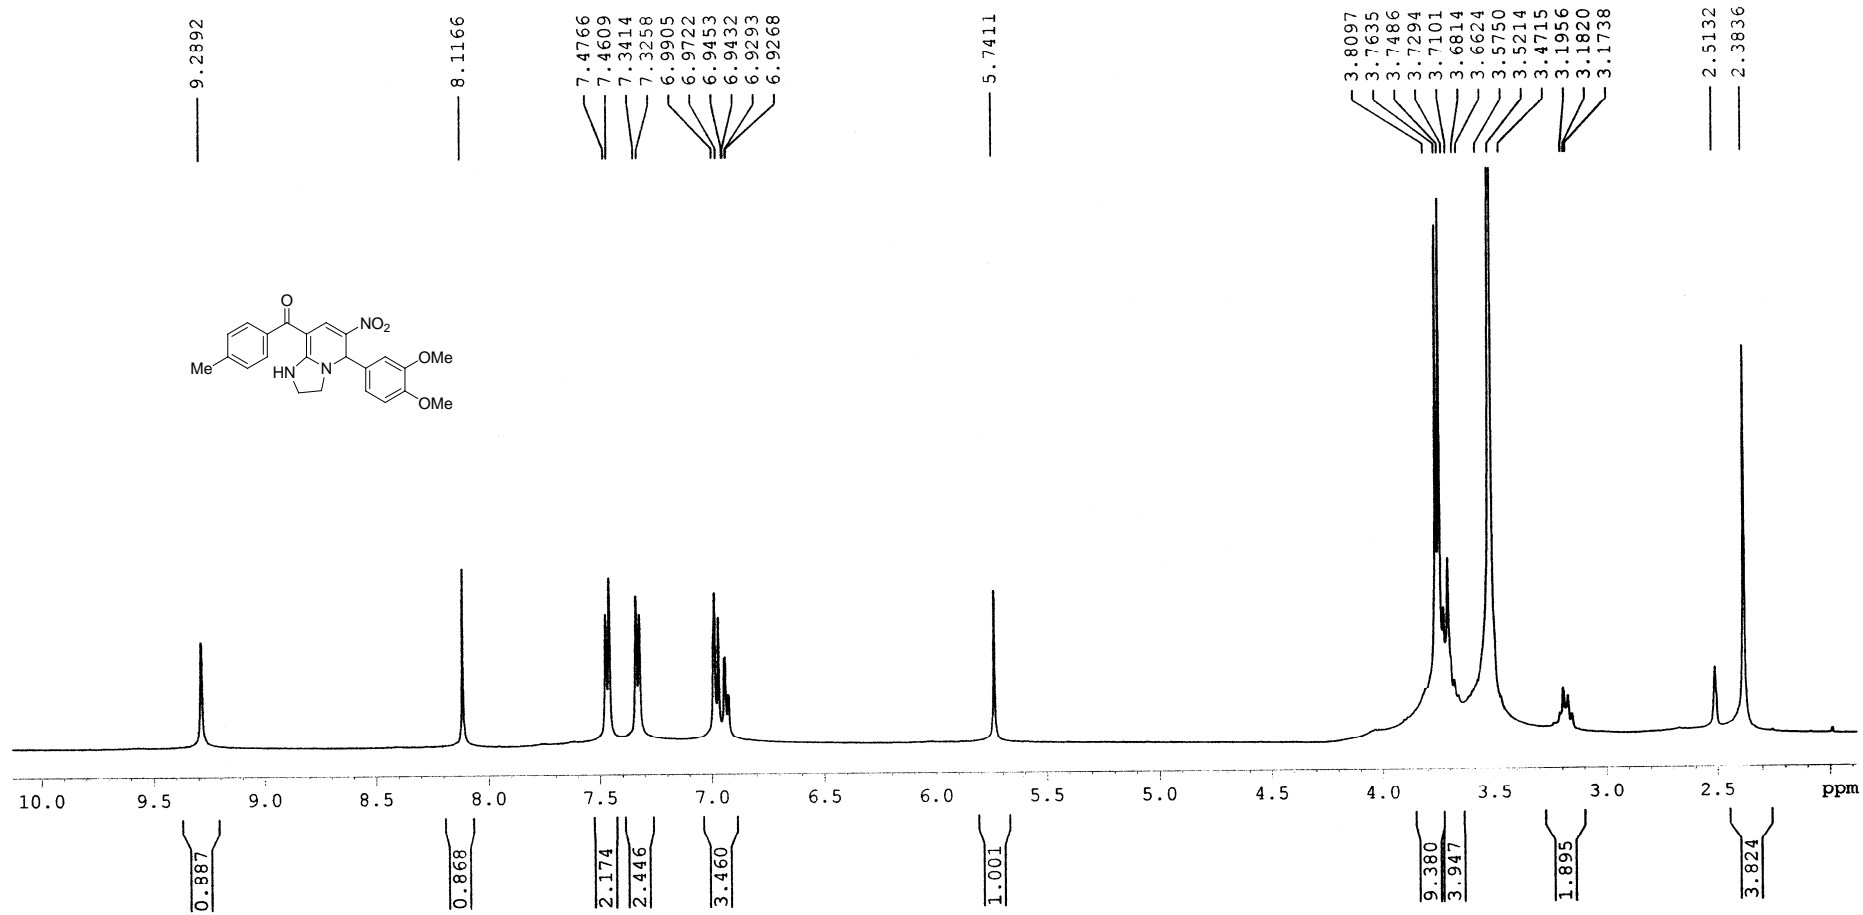

**Figure 41.**  $^1\text{H}$  NMR (500 MHz,  $\text{DMSO-}d_6$ ) spectra of compound **4u**

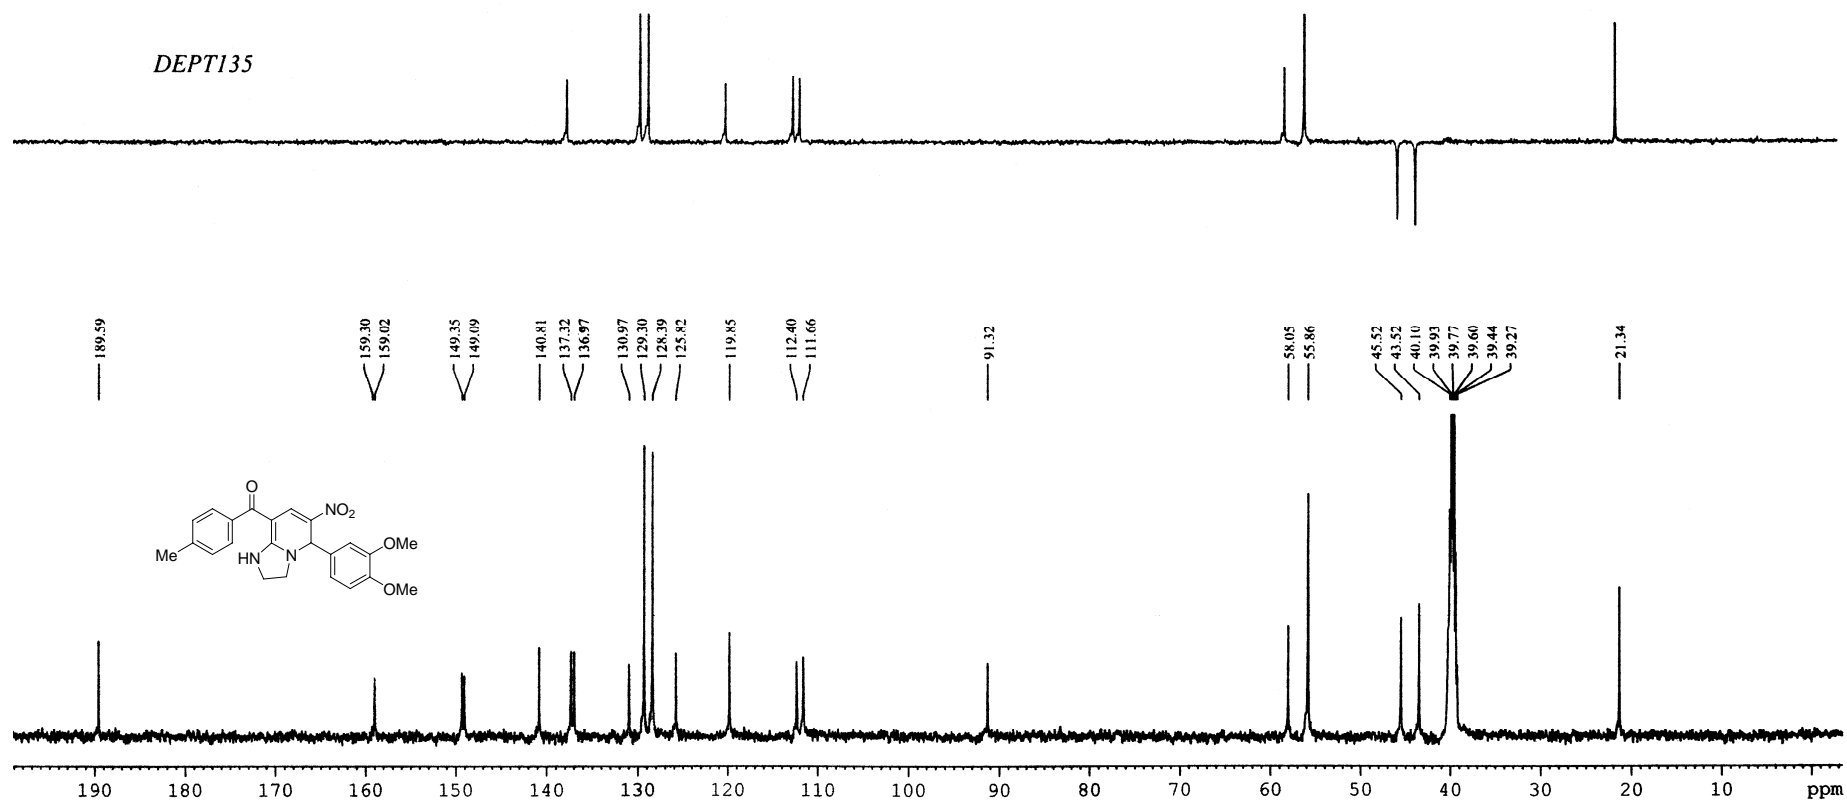

Figure 42.  $^{13}\text{C}$  NMR (125 MHz,  $\text{DMSO-}d_6$ ) spectra of compound **4u**



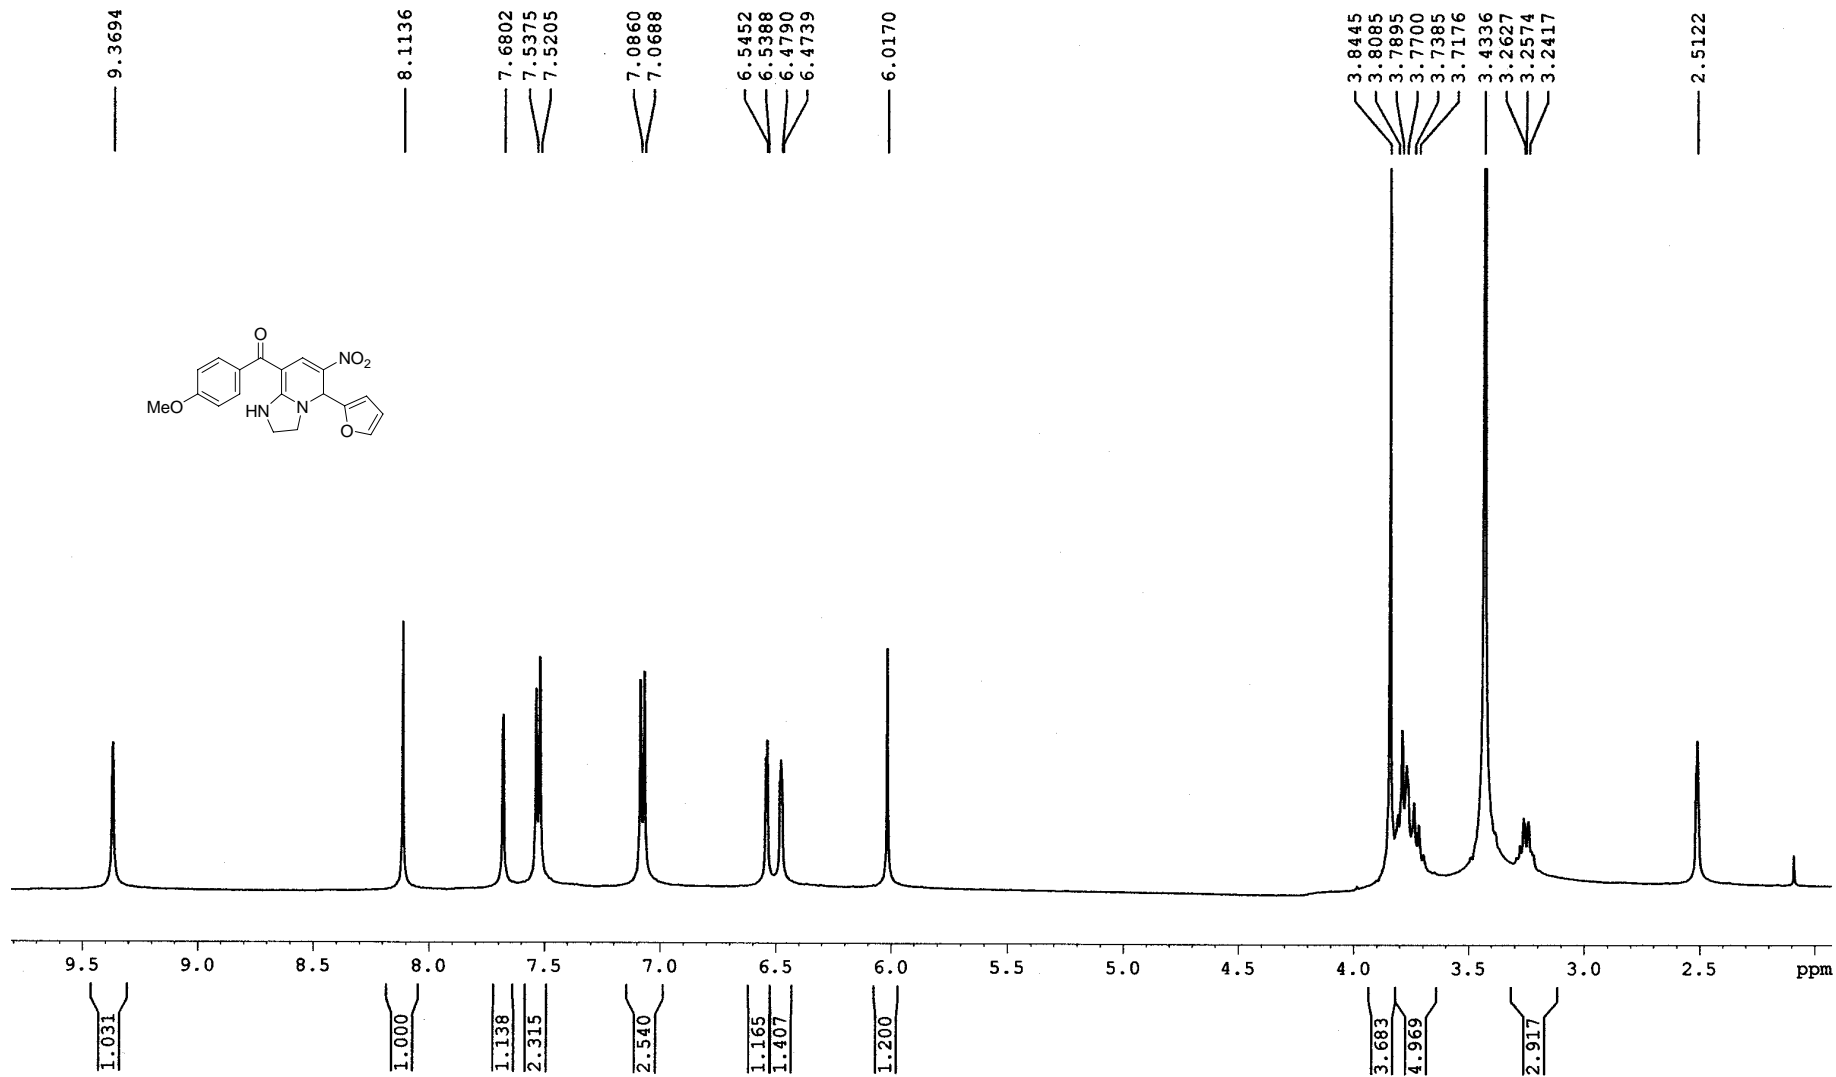

Figure 43.  $^1\text{H}$  NMR (500 MHz,  $\text{DMSO-}d_6$ ) spectra of compound 4v

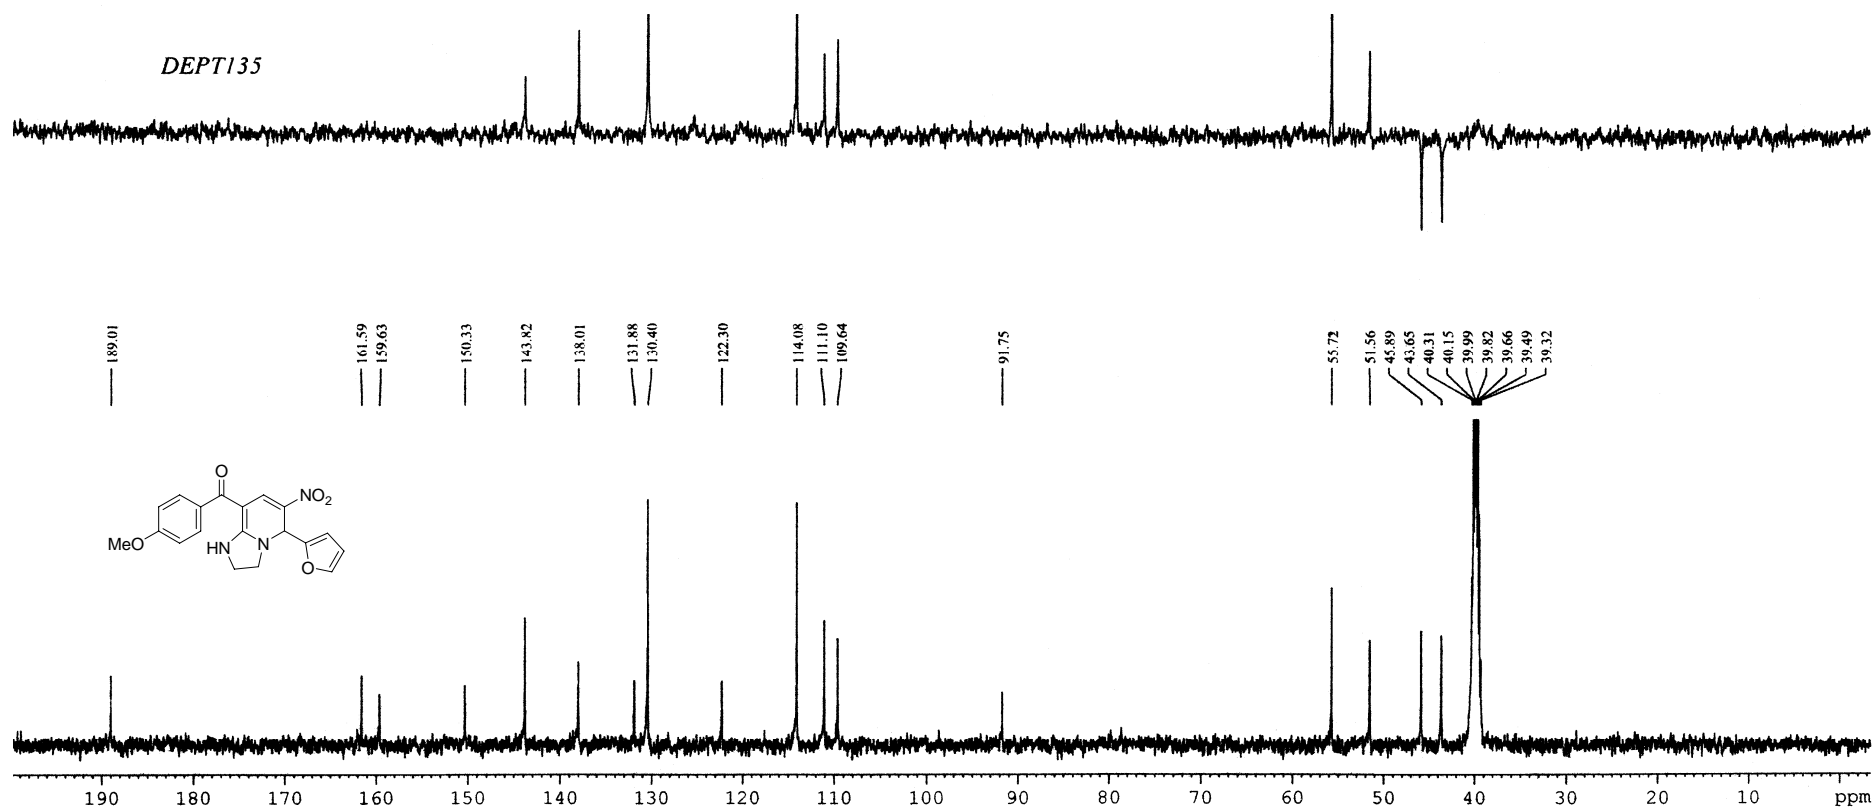

Figure 44.  $^{13}\text{C}$  NMR (125 MHz,  $\text{DMSO}-d_6$ ) spectra of compound 4v

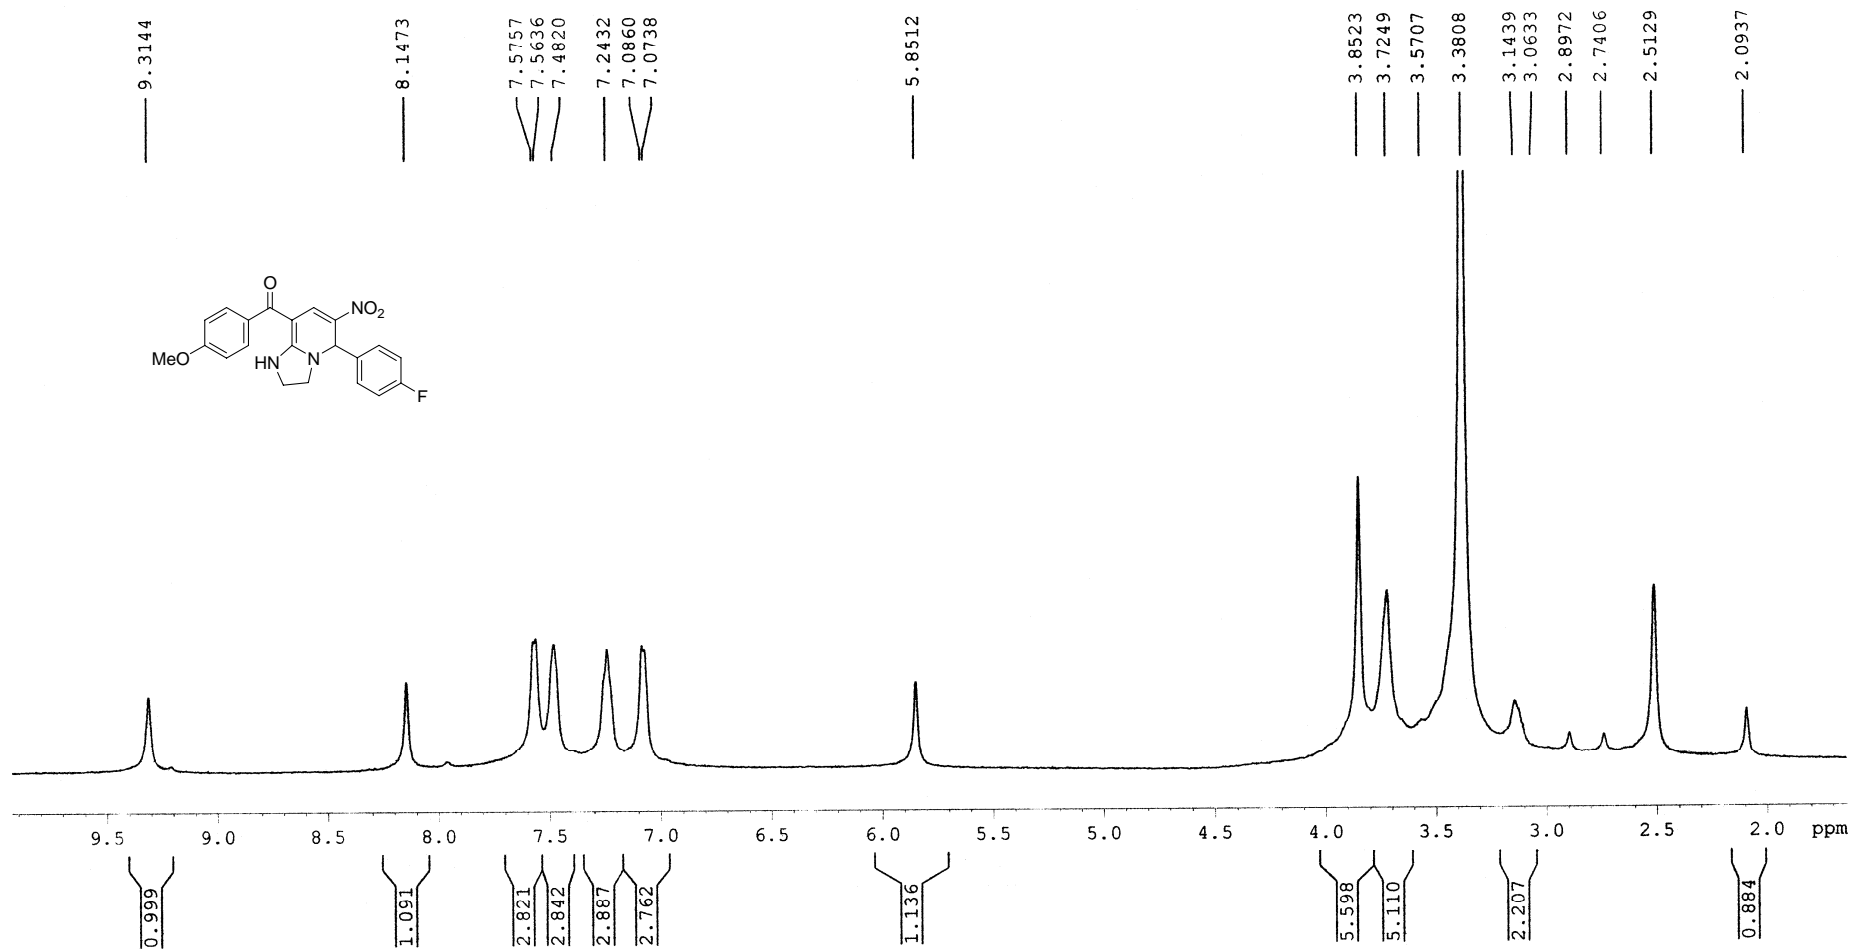

**Figure 45.** <sup>1</sup>H NMR (500 MHz, DMSO-*d*<sub>6</sub>) spectra of compound **4w**

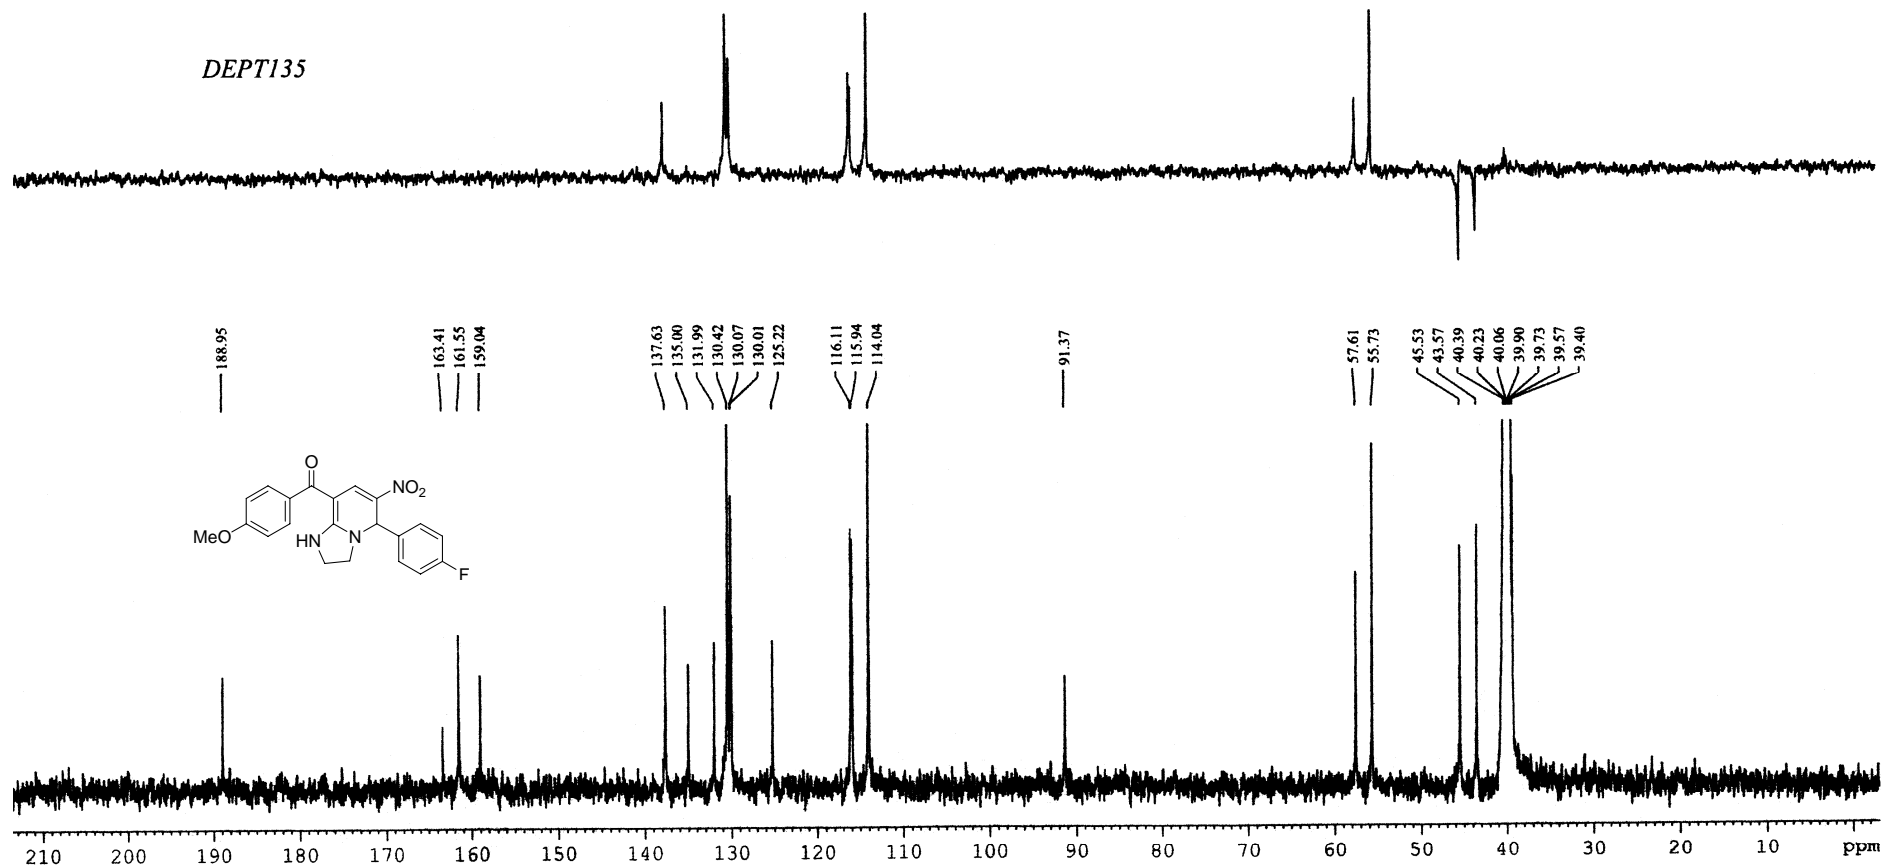

Figure 46.  $^{13}\text{C}$  NMR (125 MHz,  $\text{DMSO-}d_6$ ) spectra of compound 4w

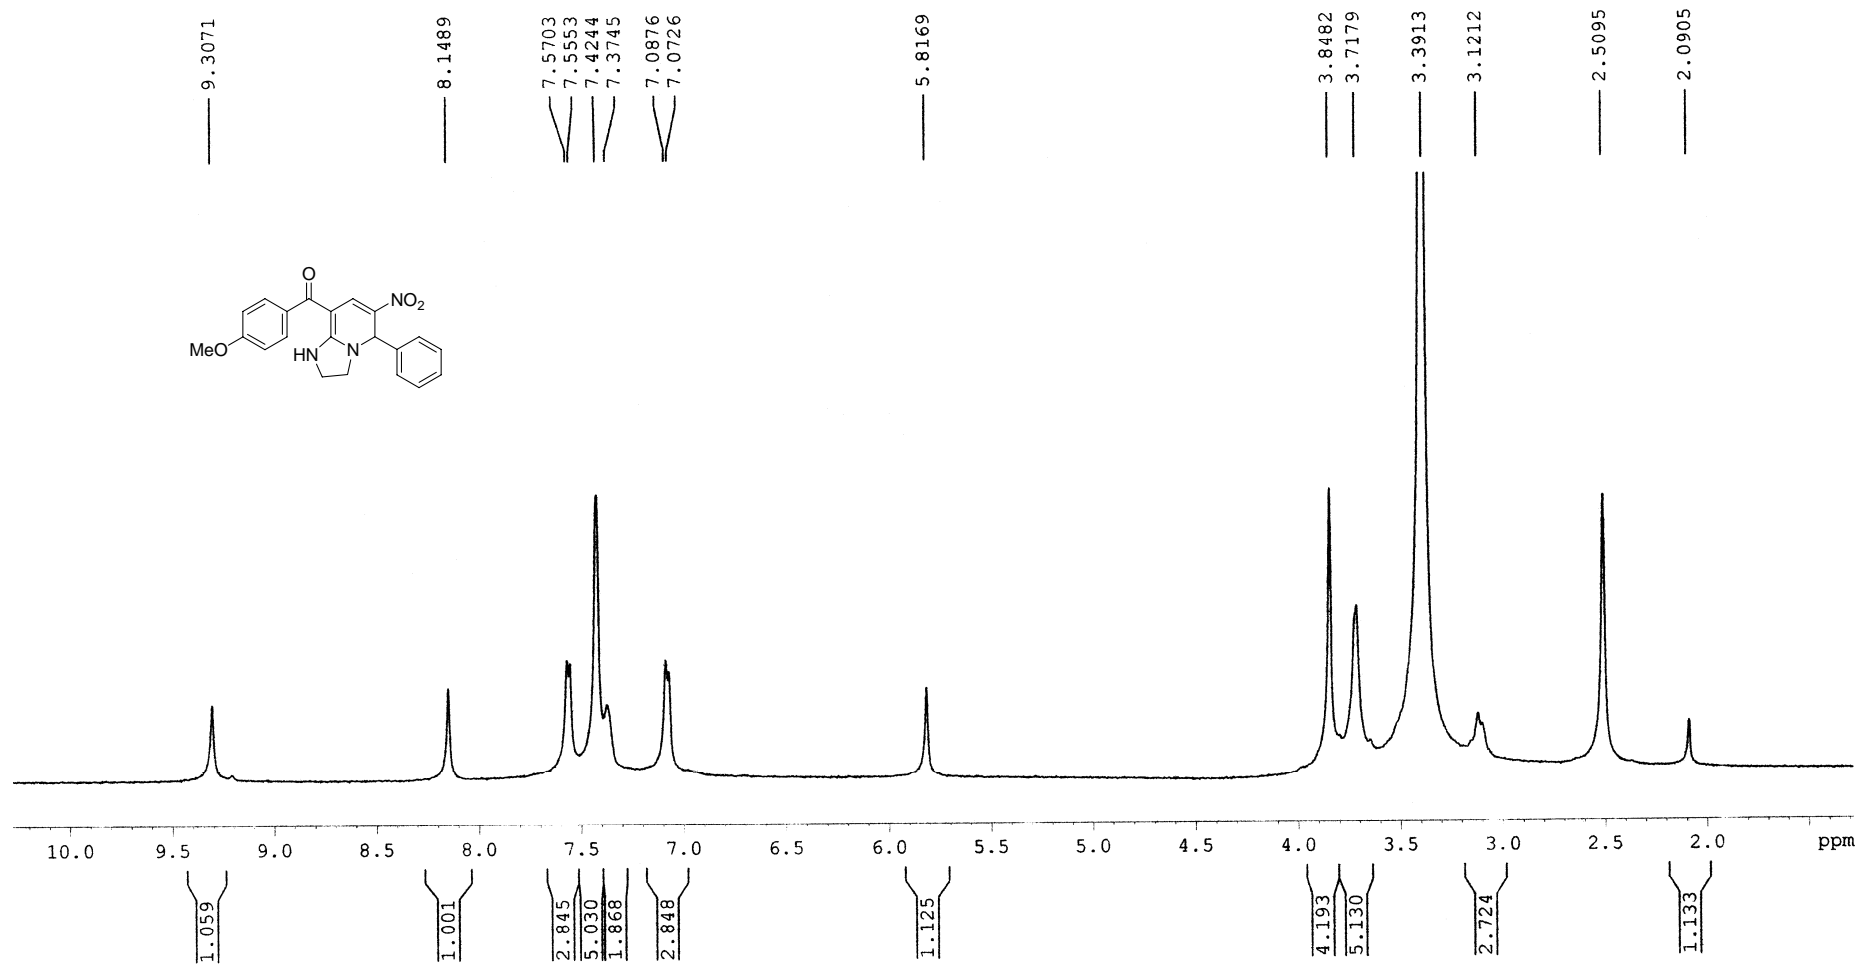

**Figure 47.**  $^1\text{H}$  NMR (500 MHz,  $\text{DMSO-}d_6$ ) spectra of compound **4x**

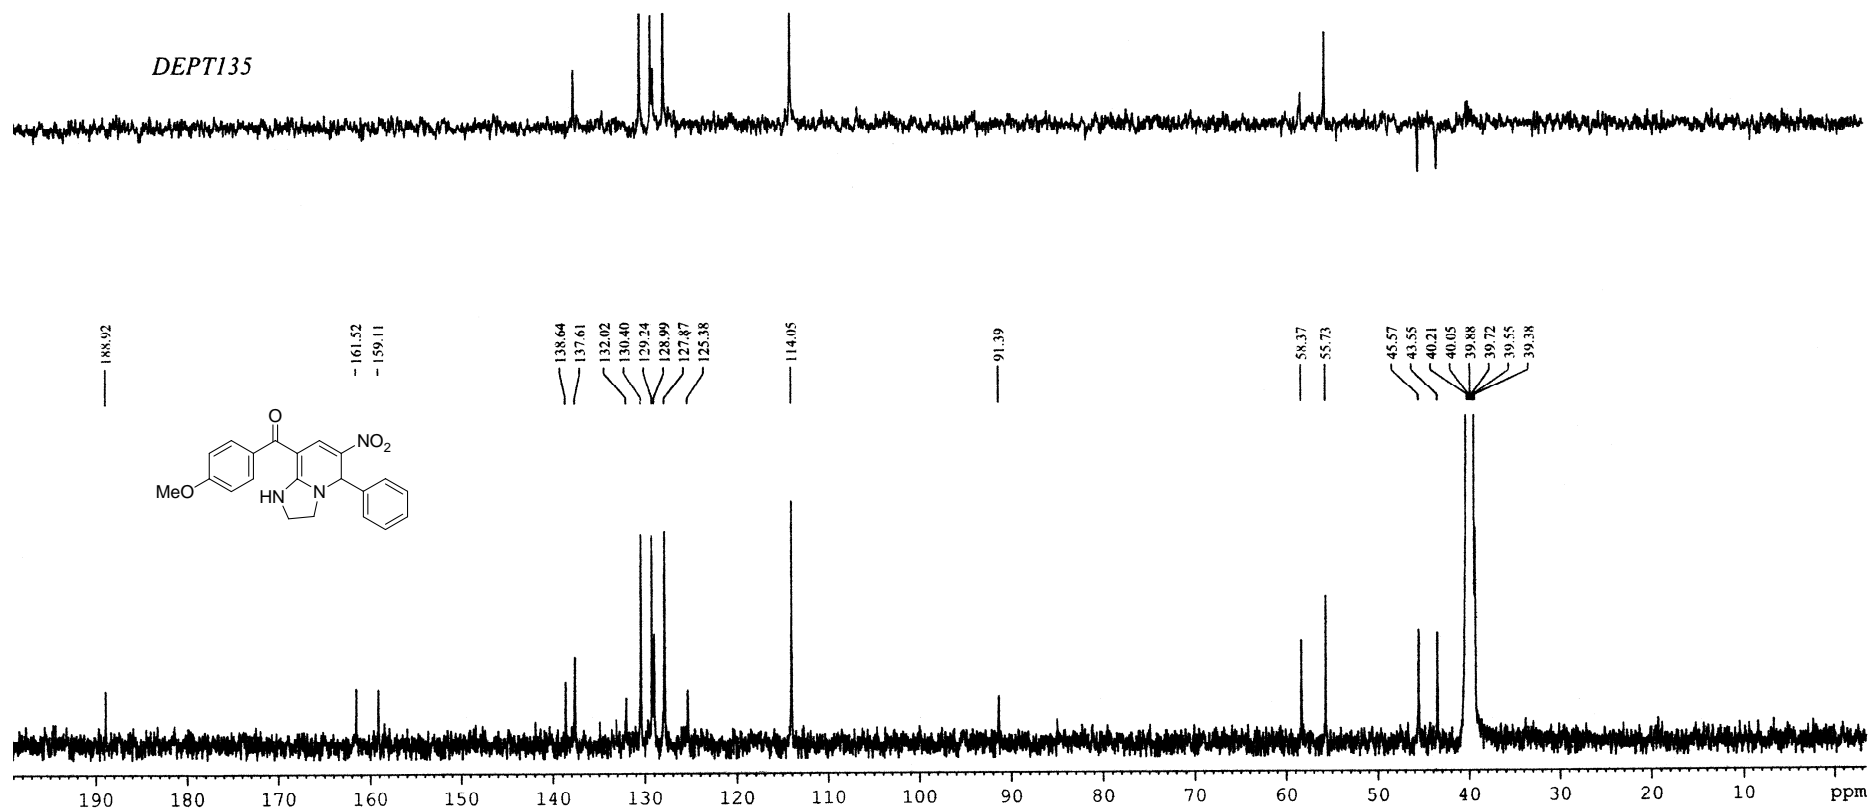

Figure 48.  $^{13}\text{C}$  NMR (125 MHz,  $\text{DMSO-}d_6$ ) spectra of compound 4x

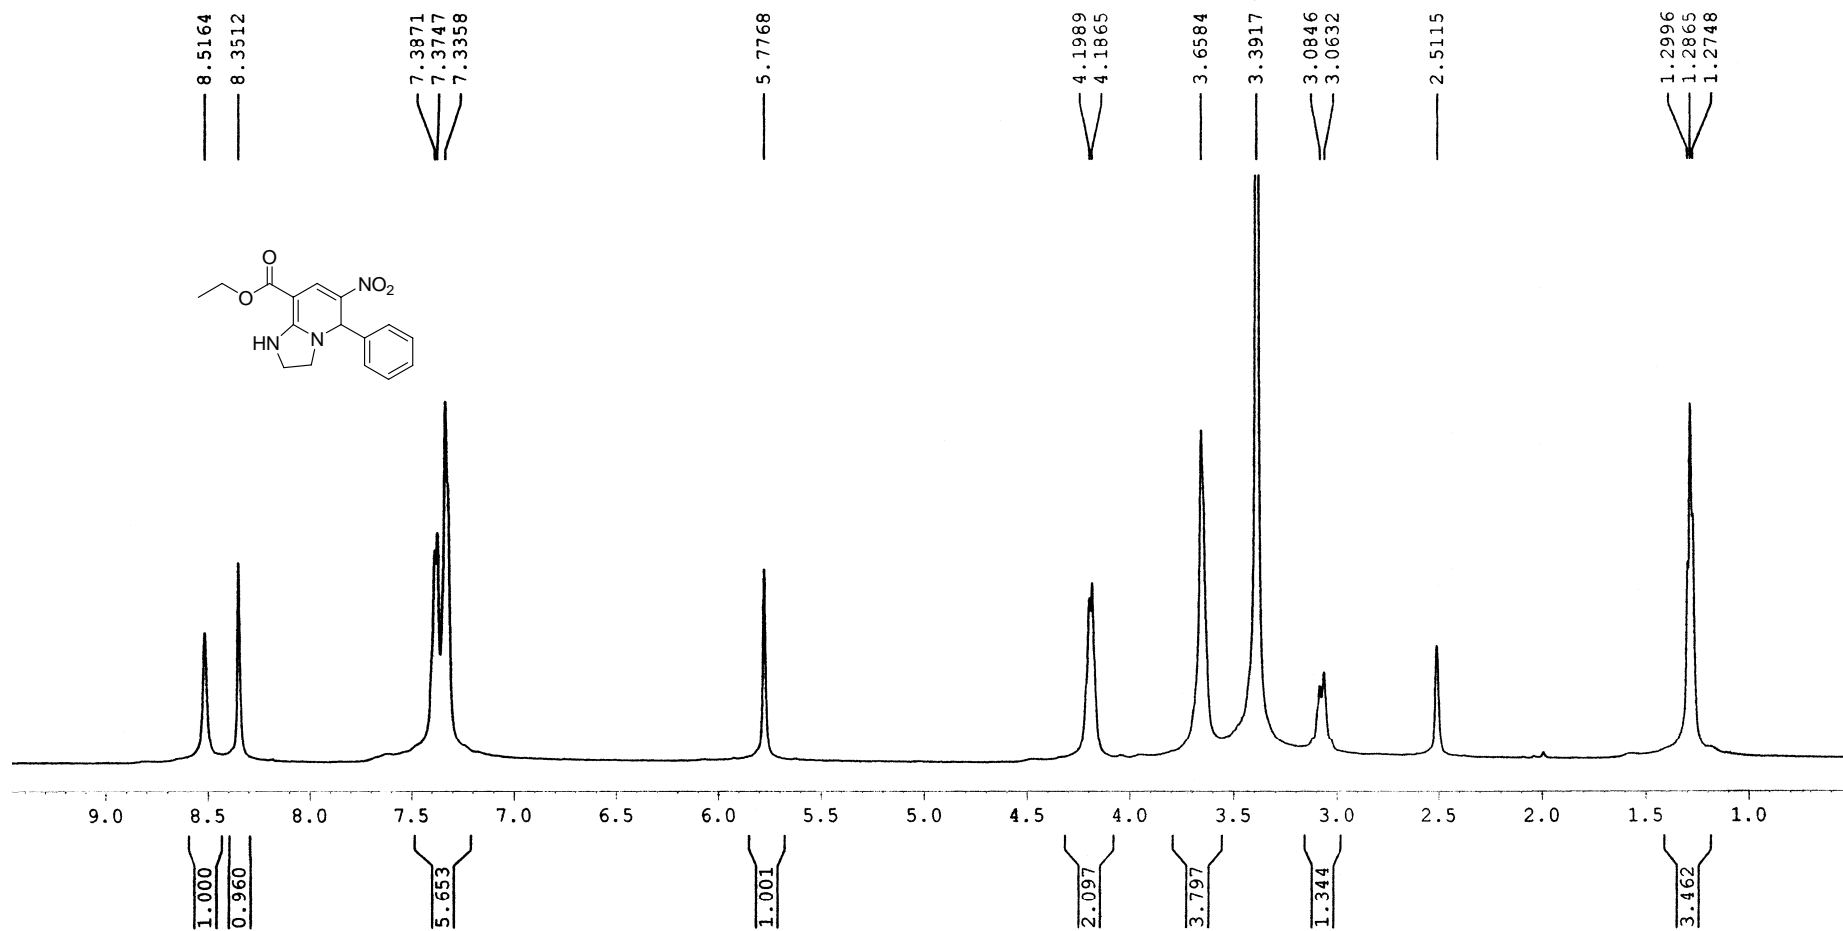

**Figure 49.**  $^1\text{H}$  NMR (500 MHz,  $\text{DMSO-}d_6$ ) spectra of compound **4y**

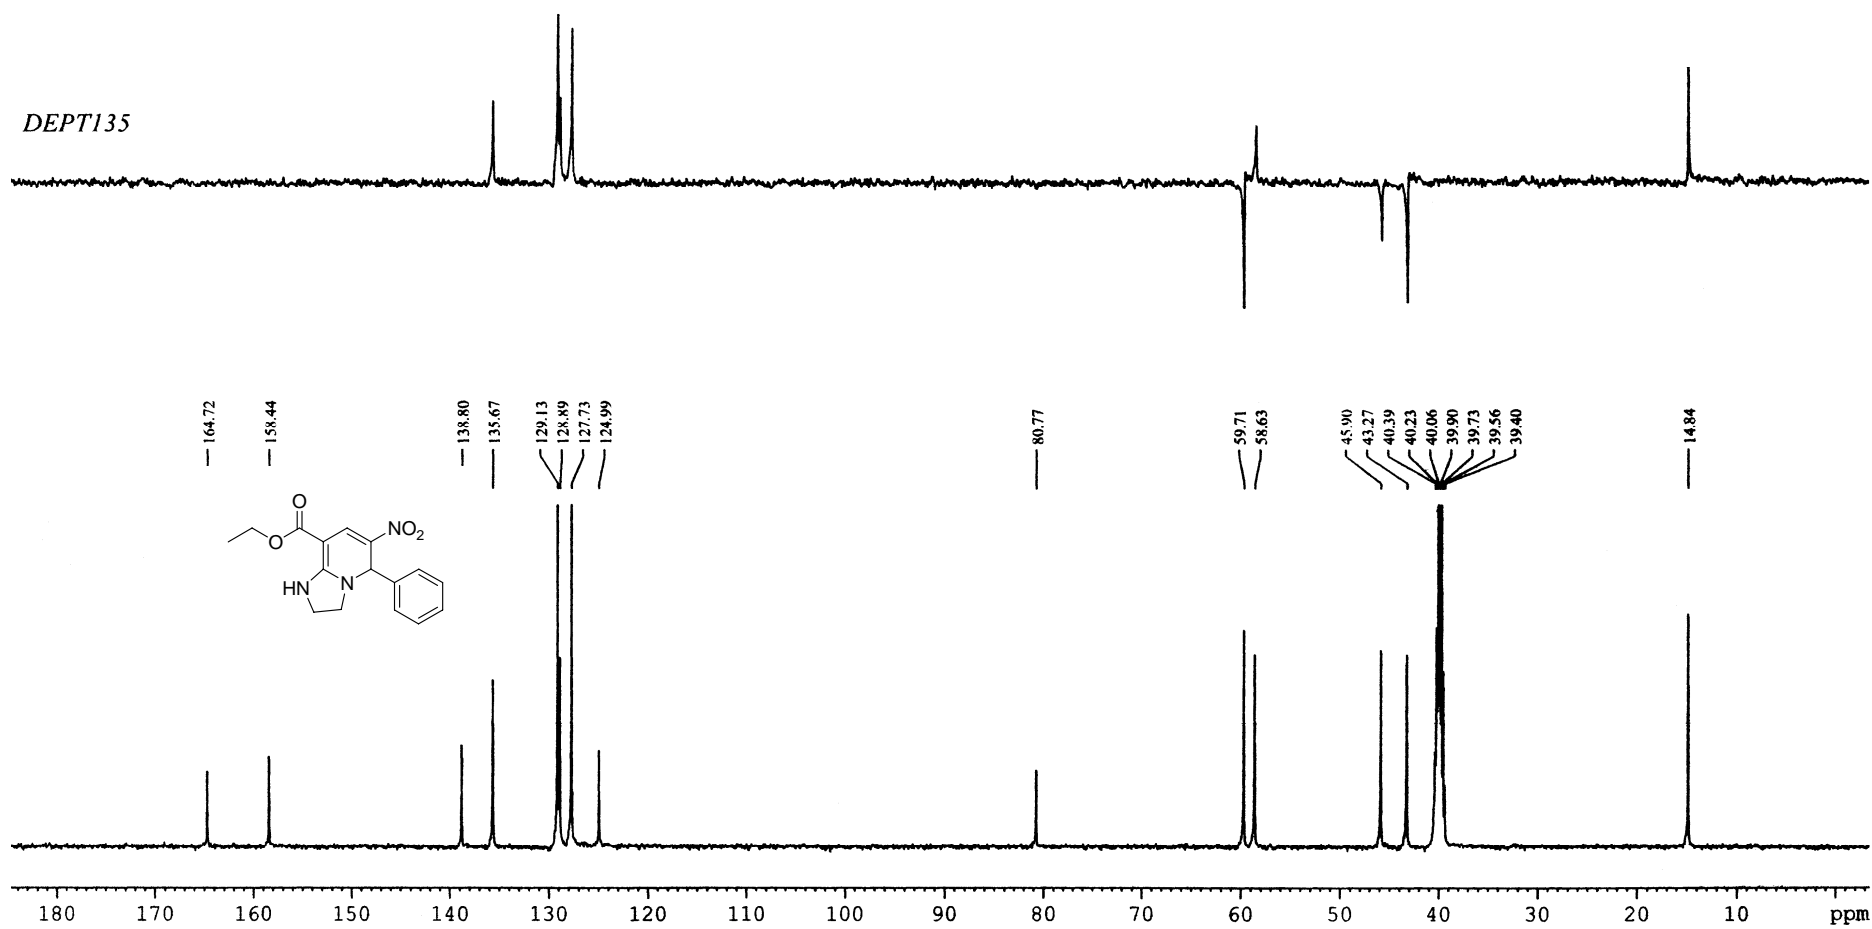

Figure 50. <sup>13</sup>C NMR (125 MHz, DMSO-*d*<sub>6</sub>) spectra of compound **4y**



## References and Notes

1. (a) Z.-T. Huang and M.-X. Wang, *Synthesis* 1992, **12**, 1273; (b) Z.-J. Li, and D. Charles, *Synth. Commun.*, 2001, **31**, 527.
2. M.-X. Zhao, M.-X. Wang and Z.-T. Huang, *Tetrahedron* 2002, **58**, 1309.
3. (a) J.-T. Liu and C.-F. Yao, *Tetrahedron Lett.*, 2001, **42**, 6147; (b) G. Demicheli, R. Maggi, A. Mazzacani, P. Righi, G. Sartori and F. Bigi, *Tetrahedron Lett.*, 2001, **42**, 2401; (c) Y.-. Jang, W.-W. Lin, Y.-K. Shih, J.-T. Liu, M.-H. Hwang and C.-F. Yao, *Tetrahedron* 2003, **59**, 4979.
4. CCDC 818211 contain the supplementary crystallographic data for compound **4f**. These data can be obtained free of charge from The Cambridge Crystallographic Data Center via [www.ccdc.cam.ac.uk/data\\_request/cif](http://www.ccdc.cam.ac.uk/data_request/cif).
